# Supplementary material for: Total Synthesis of the Racemate of Laurolitsine
Source: MDPI journal article supplement (doi:10.3390/molecules29030745), 2024-02-05

Supporting Information for

# Total Synthesis of the Racemate of Laurolitsine

Mingyu Cao <sup>1</sup>, Yiming Wang <sup>1</sup>, Yong Zhang<sup>1</sup>, Caiyun Zhang<sup>1</sup>, Niangen Chen<sup>1,\*</sup> and Xiaopo Zhang<sup>1,2,\*</sup>

1 Key Laboratory of Tropical Translational Medicine of Ministry of Education, Hainan Key Laboratory for Research and Development of Tropical Herbs, School of Pharmacy, Hainan Medical University, Haikou 571199, China

2 Research Center for Drug Safety Evaluation of Hainan Province, Hainan Medical University, Haikou 571101, China

3 Correspondence: hy0207011@hainmc.edu.cn (N. C.); hy0207077@hainmc.edu.cn (X. Z.). Tel: +86-0898-66893826 (X. Z.)

## Table of Contents

|                                                                                |         |
|--------------------------------------------------------------------------------|---------|
| ● <sup>1</sup> H NMR and <sup>13</sup> C NMR spectra of 2.....                 | S2-S3   |
| ● <sup>1</sup> H NMR and <sup>13</sup> C NMR spectra of 3.....                 | S4-S5   |
| ● <sup>1</sup> H NMR and <sup>13</sup> C NMR spectra of 4.....                 | S6-S7   |
| ● <sup>1</sup> H NMR and <sup>13</sup> C NMR spectra of 6.....                 | S8-S9   |
| ● <sup>1</sup> H NMR and <sup>13</sup> C NMR spectra of 7.....                 | S10-S11 |
| ● <sup>1</sup> H NMR and <sup>13</sup> C NMR spectra of 8.....                 | S12-S13 |
| ● <sup>1</sup> H NMR and <sup>13</sup> C NMR spectra of 9.....                 | S14-S15 |
| ● <sup>1</sup> H NMR and <sup>13</sup> C NMR spectra of 10.....                | S16-S17 |
| ● <sup>1</sup> H NMR and <sup>13</sup> C NMR spectra of 11.....                | S18-S19 |
| ● <sup>1</sup> H NMR and <sup>13</sup> C NMR spectra of 12.....                | S20-S21 |
| ● <sup>1</sup> H NMR and <sup>13</sup> C NMR spectra of 13.....                | S22-S23 |
| ● <sup>1</sup> H NMR and <sup>13</sup> C NMR spectra of 14.....                | S24-S25 |
| ● <sup>1</sup> H NMR and <sup>13</sup> C NMR spectra of 15.....                | S26-S27 |
| ● <sup>1</sup> H NMR and <sup>13</sup> C NMR spectra of Laurolitsine (16)..... | S28-S29 |

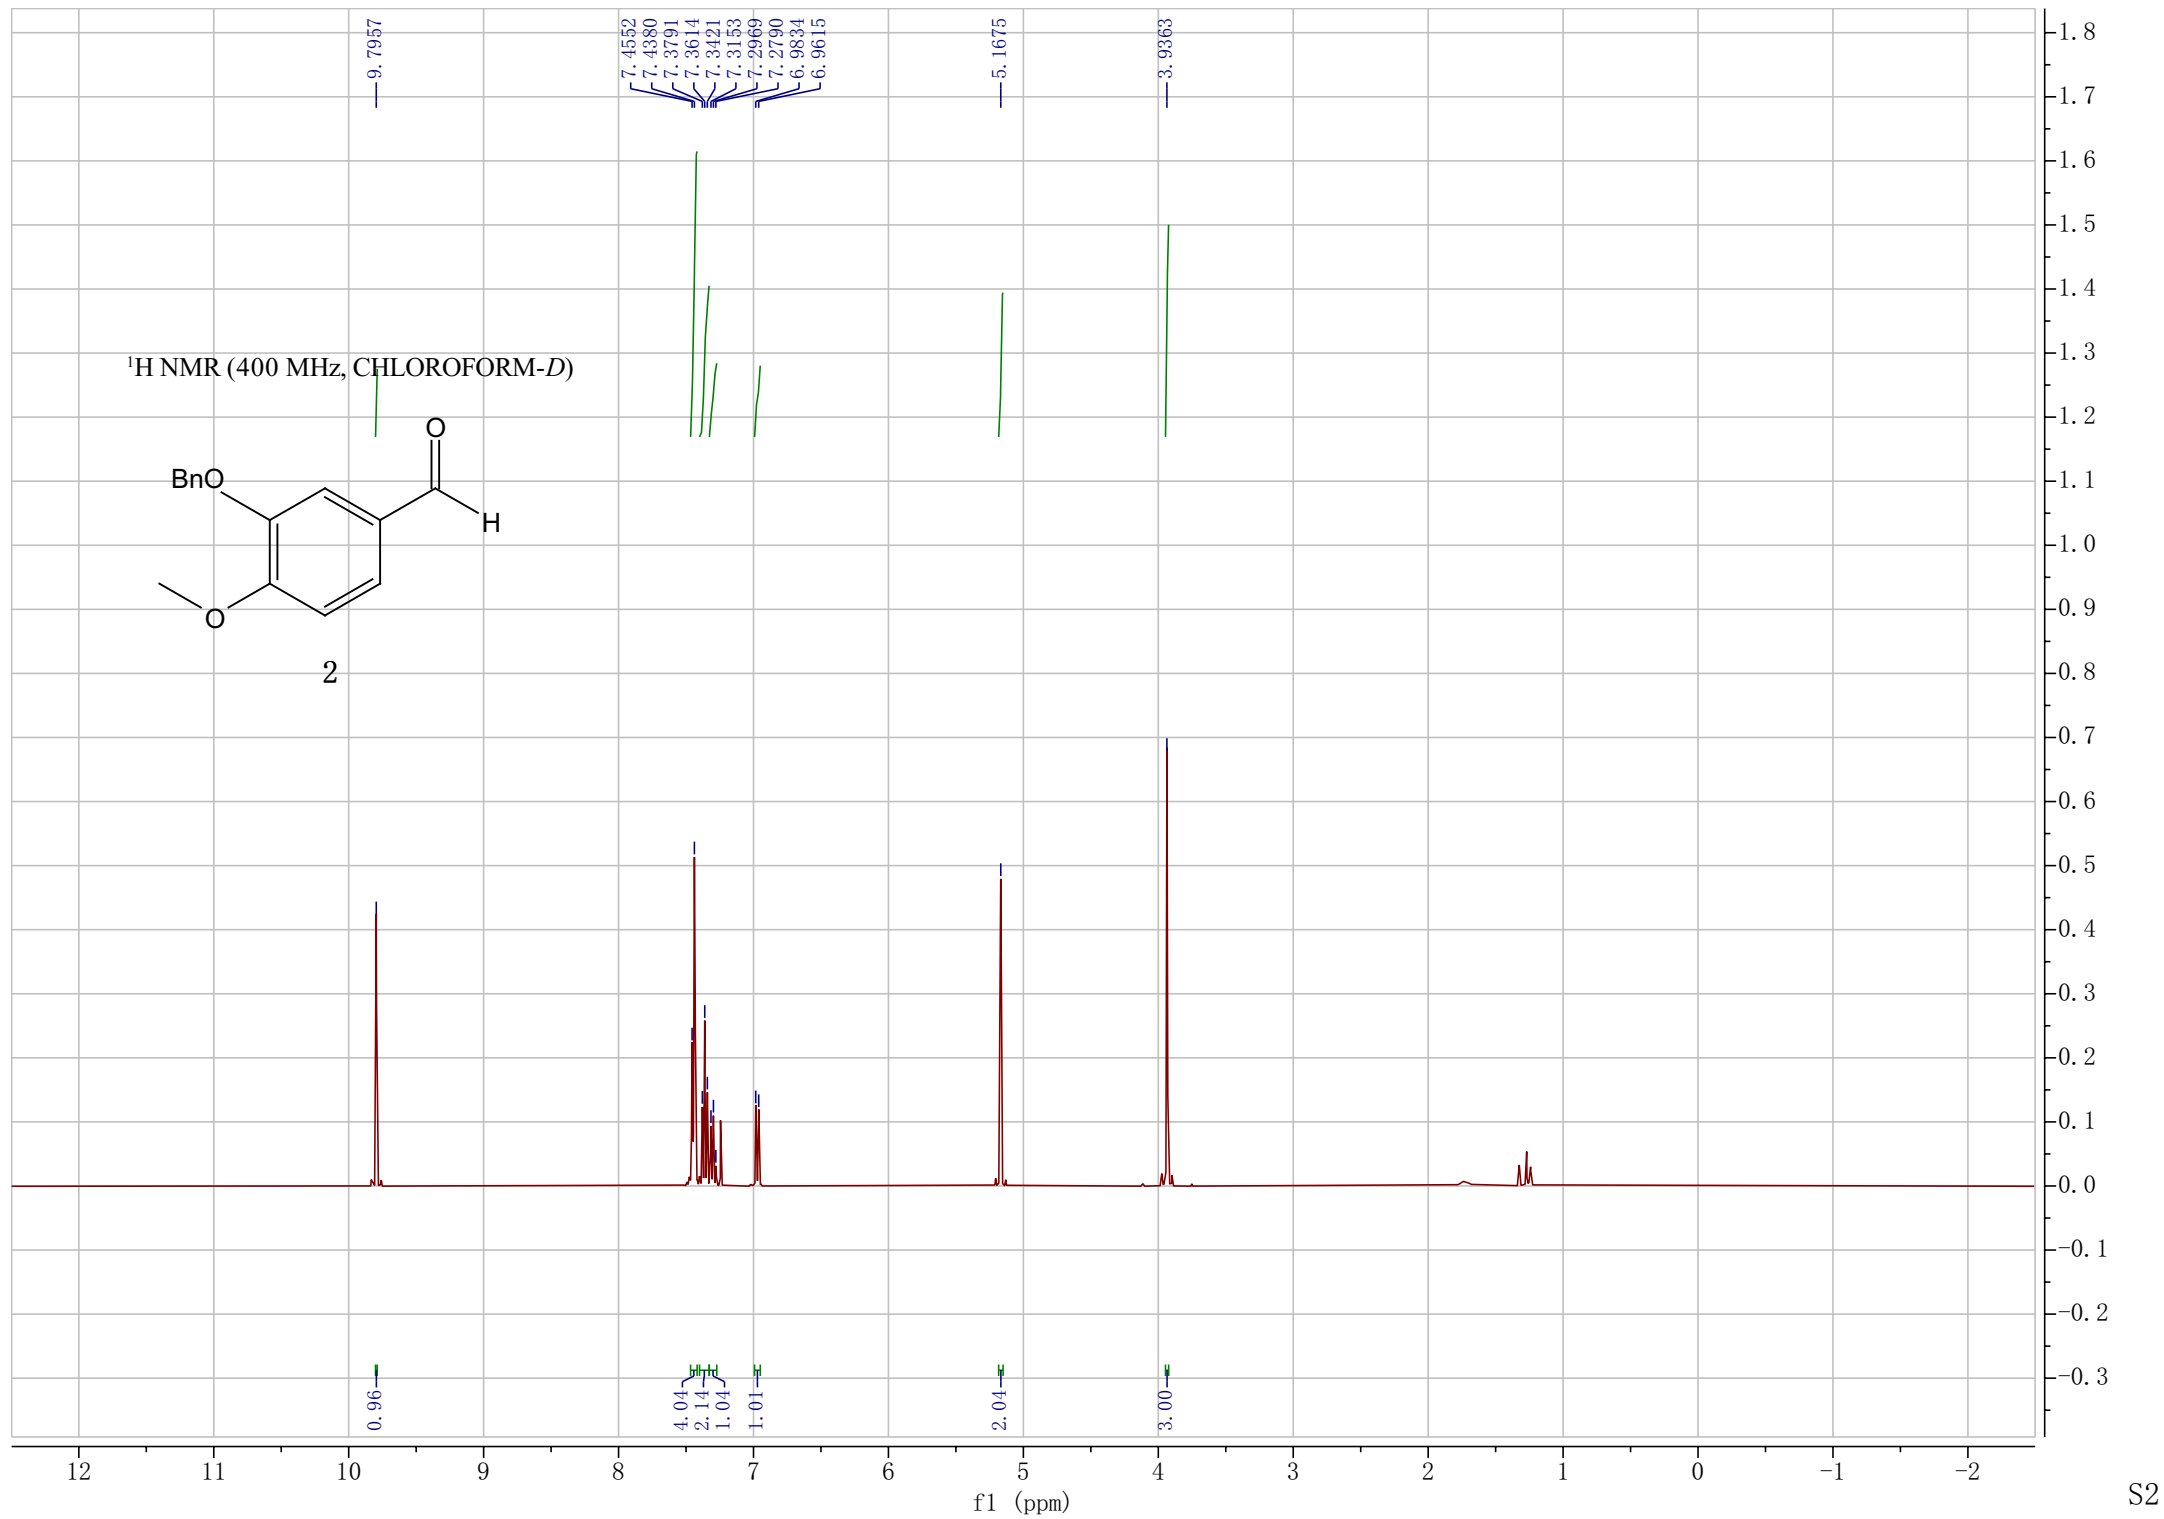

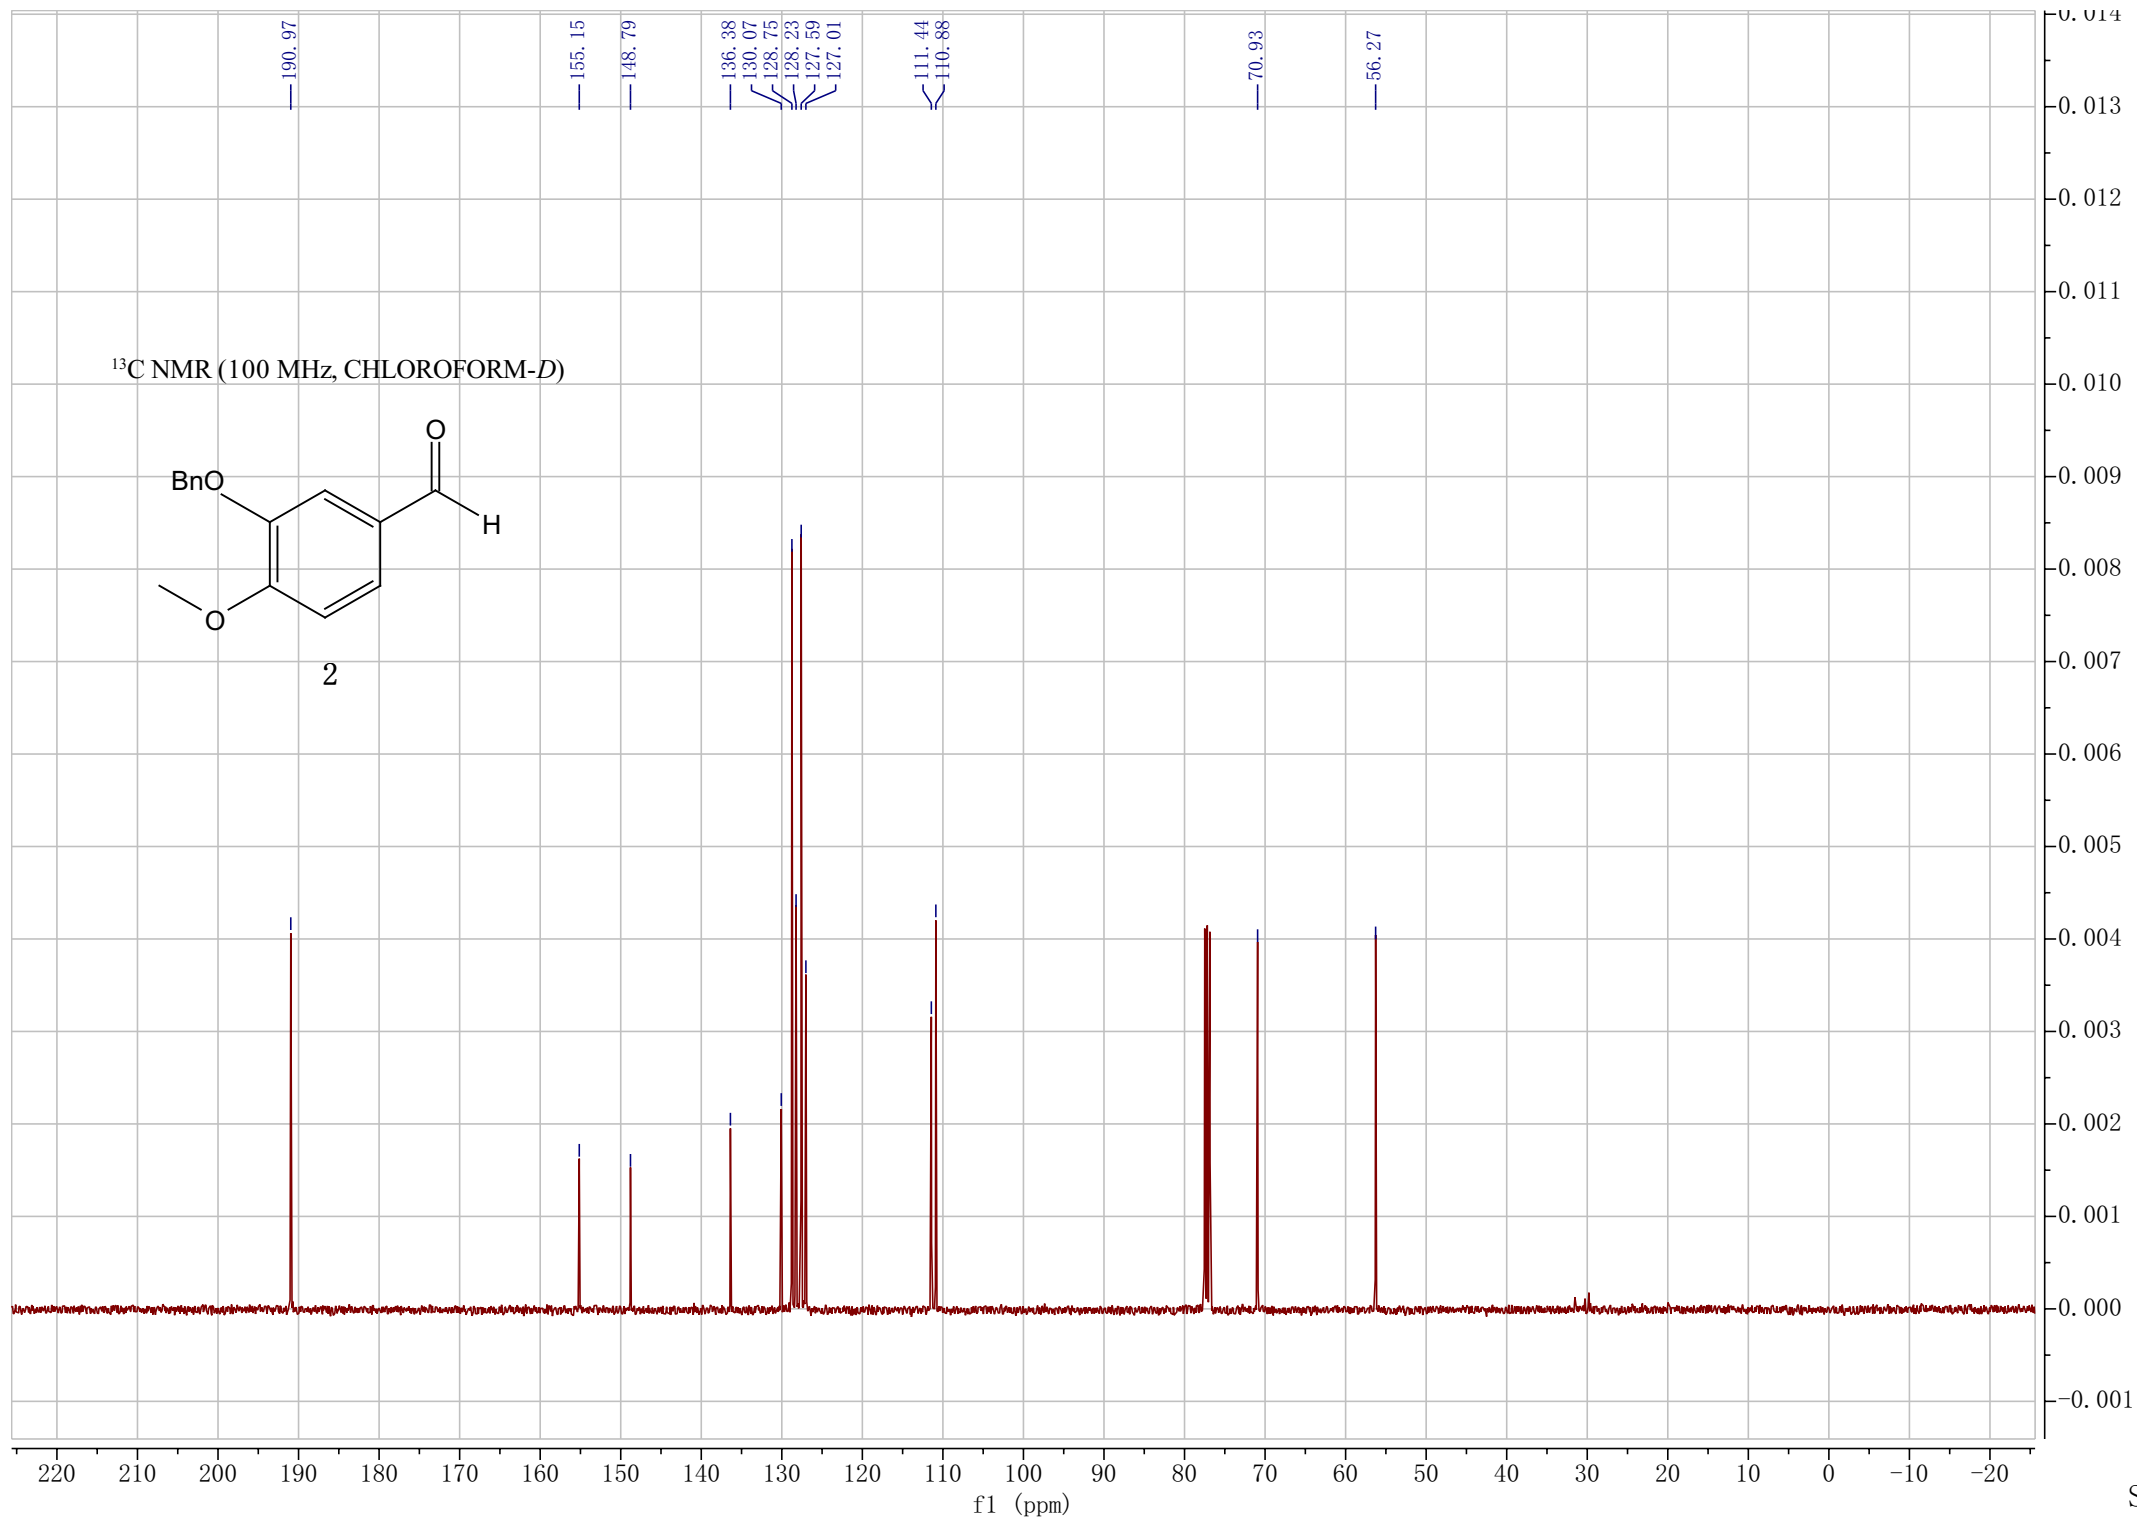

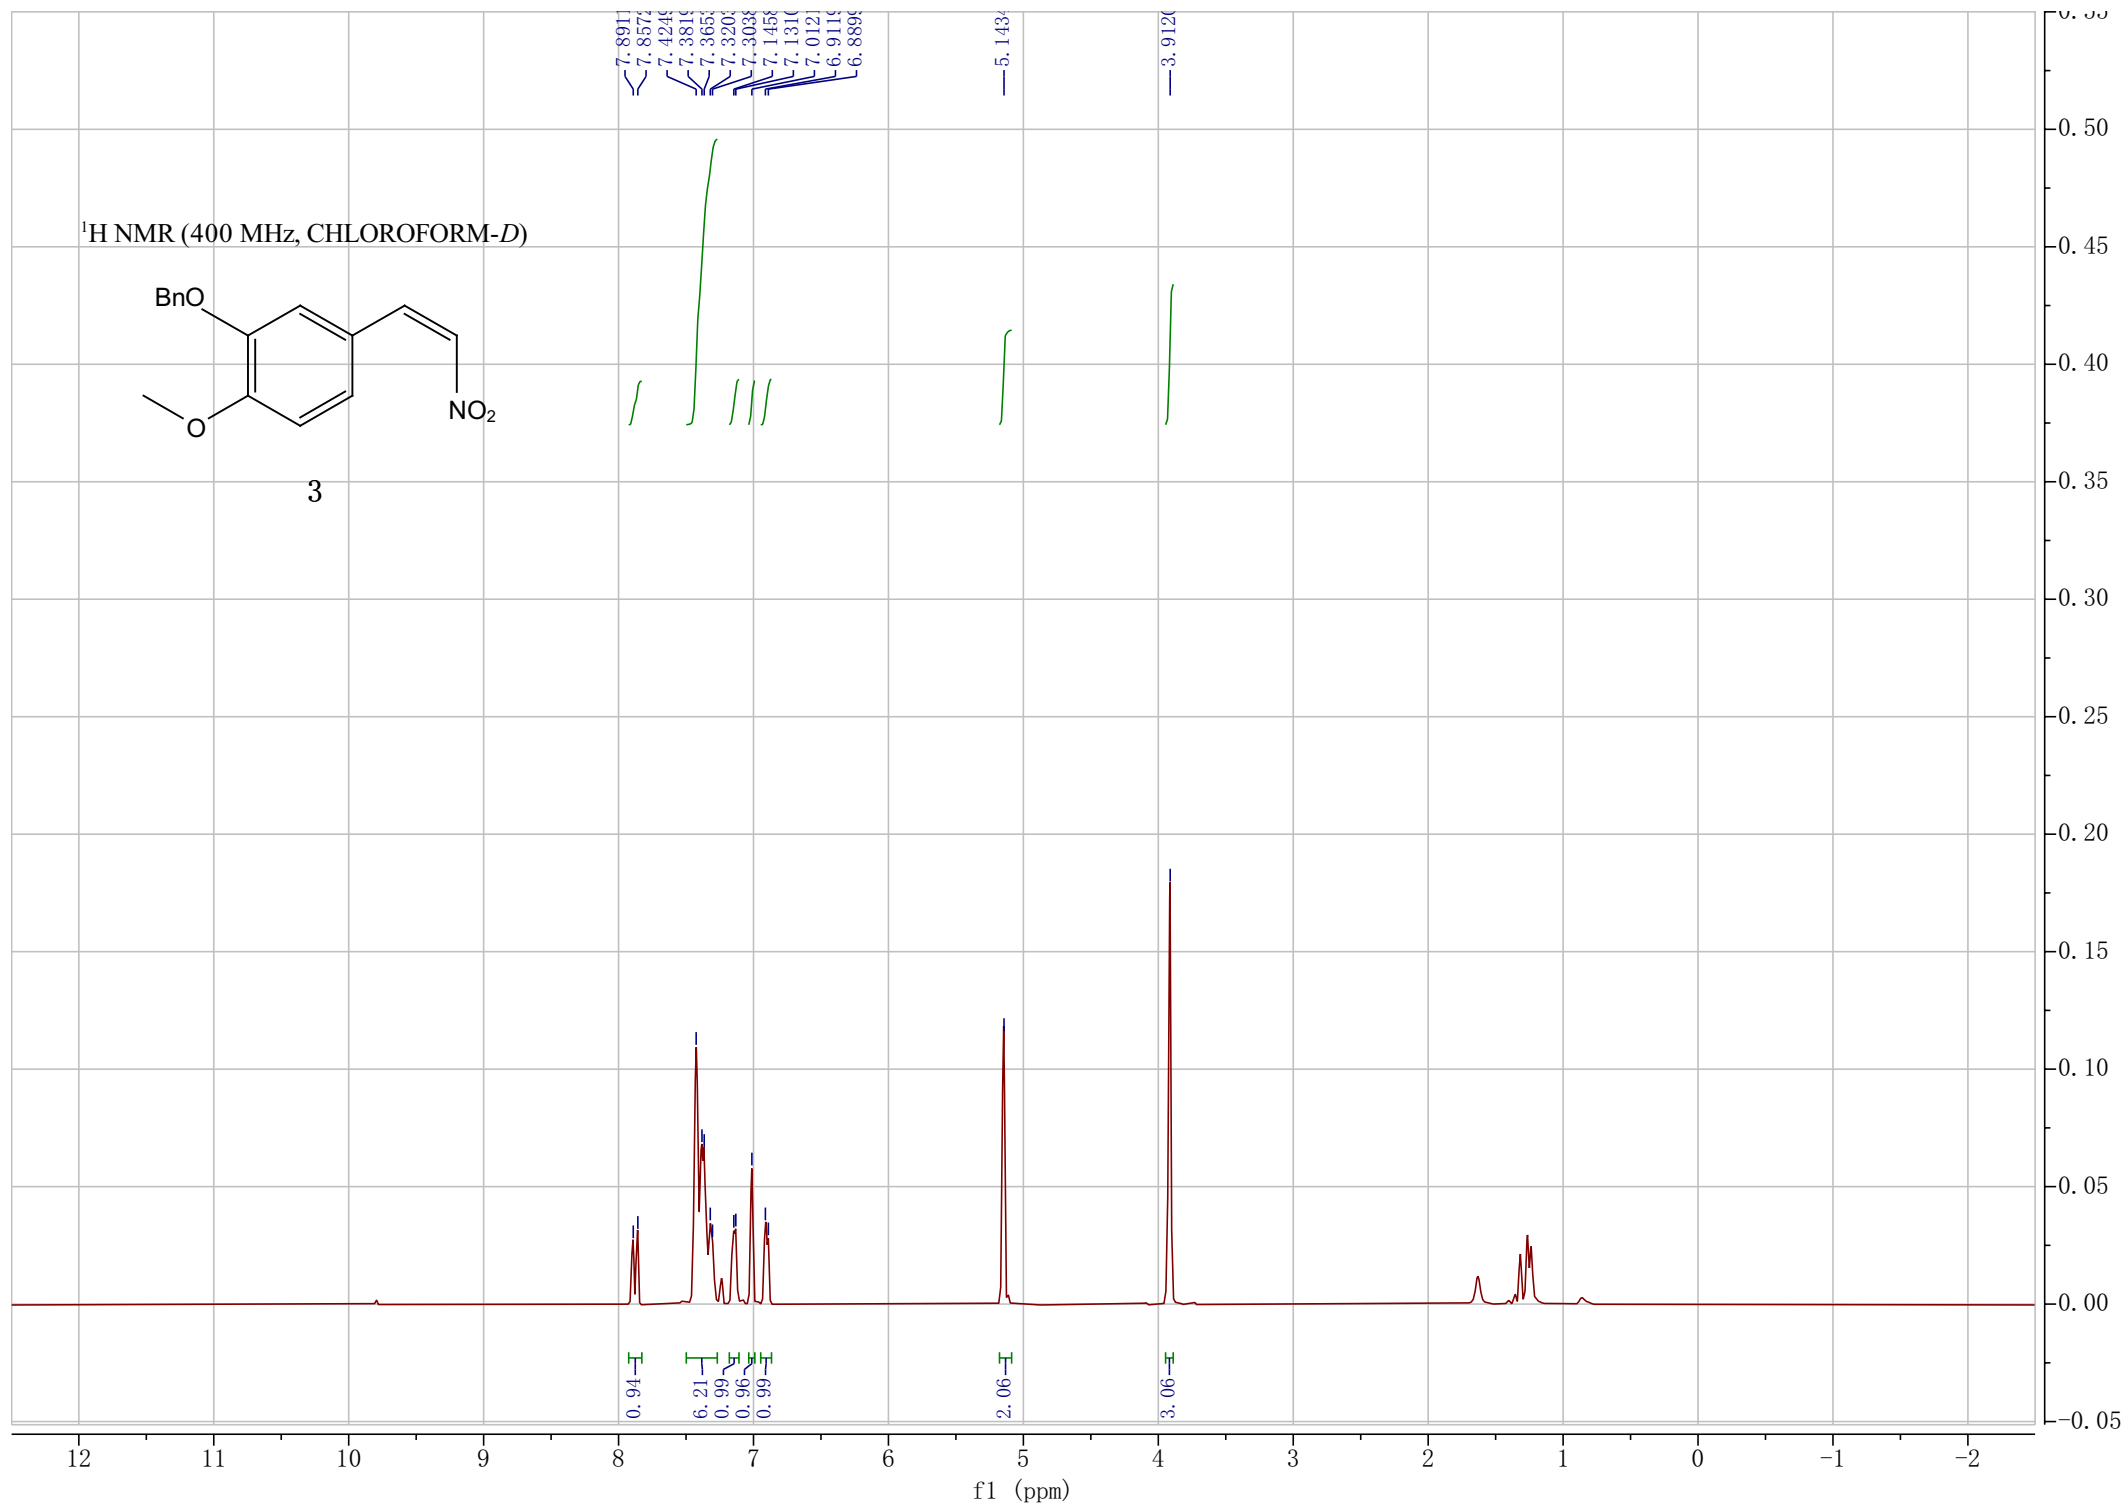

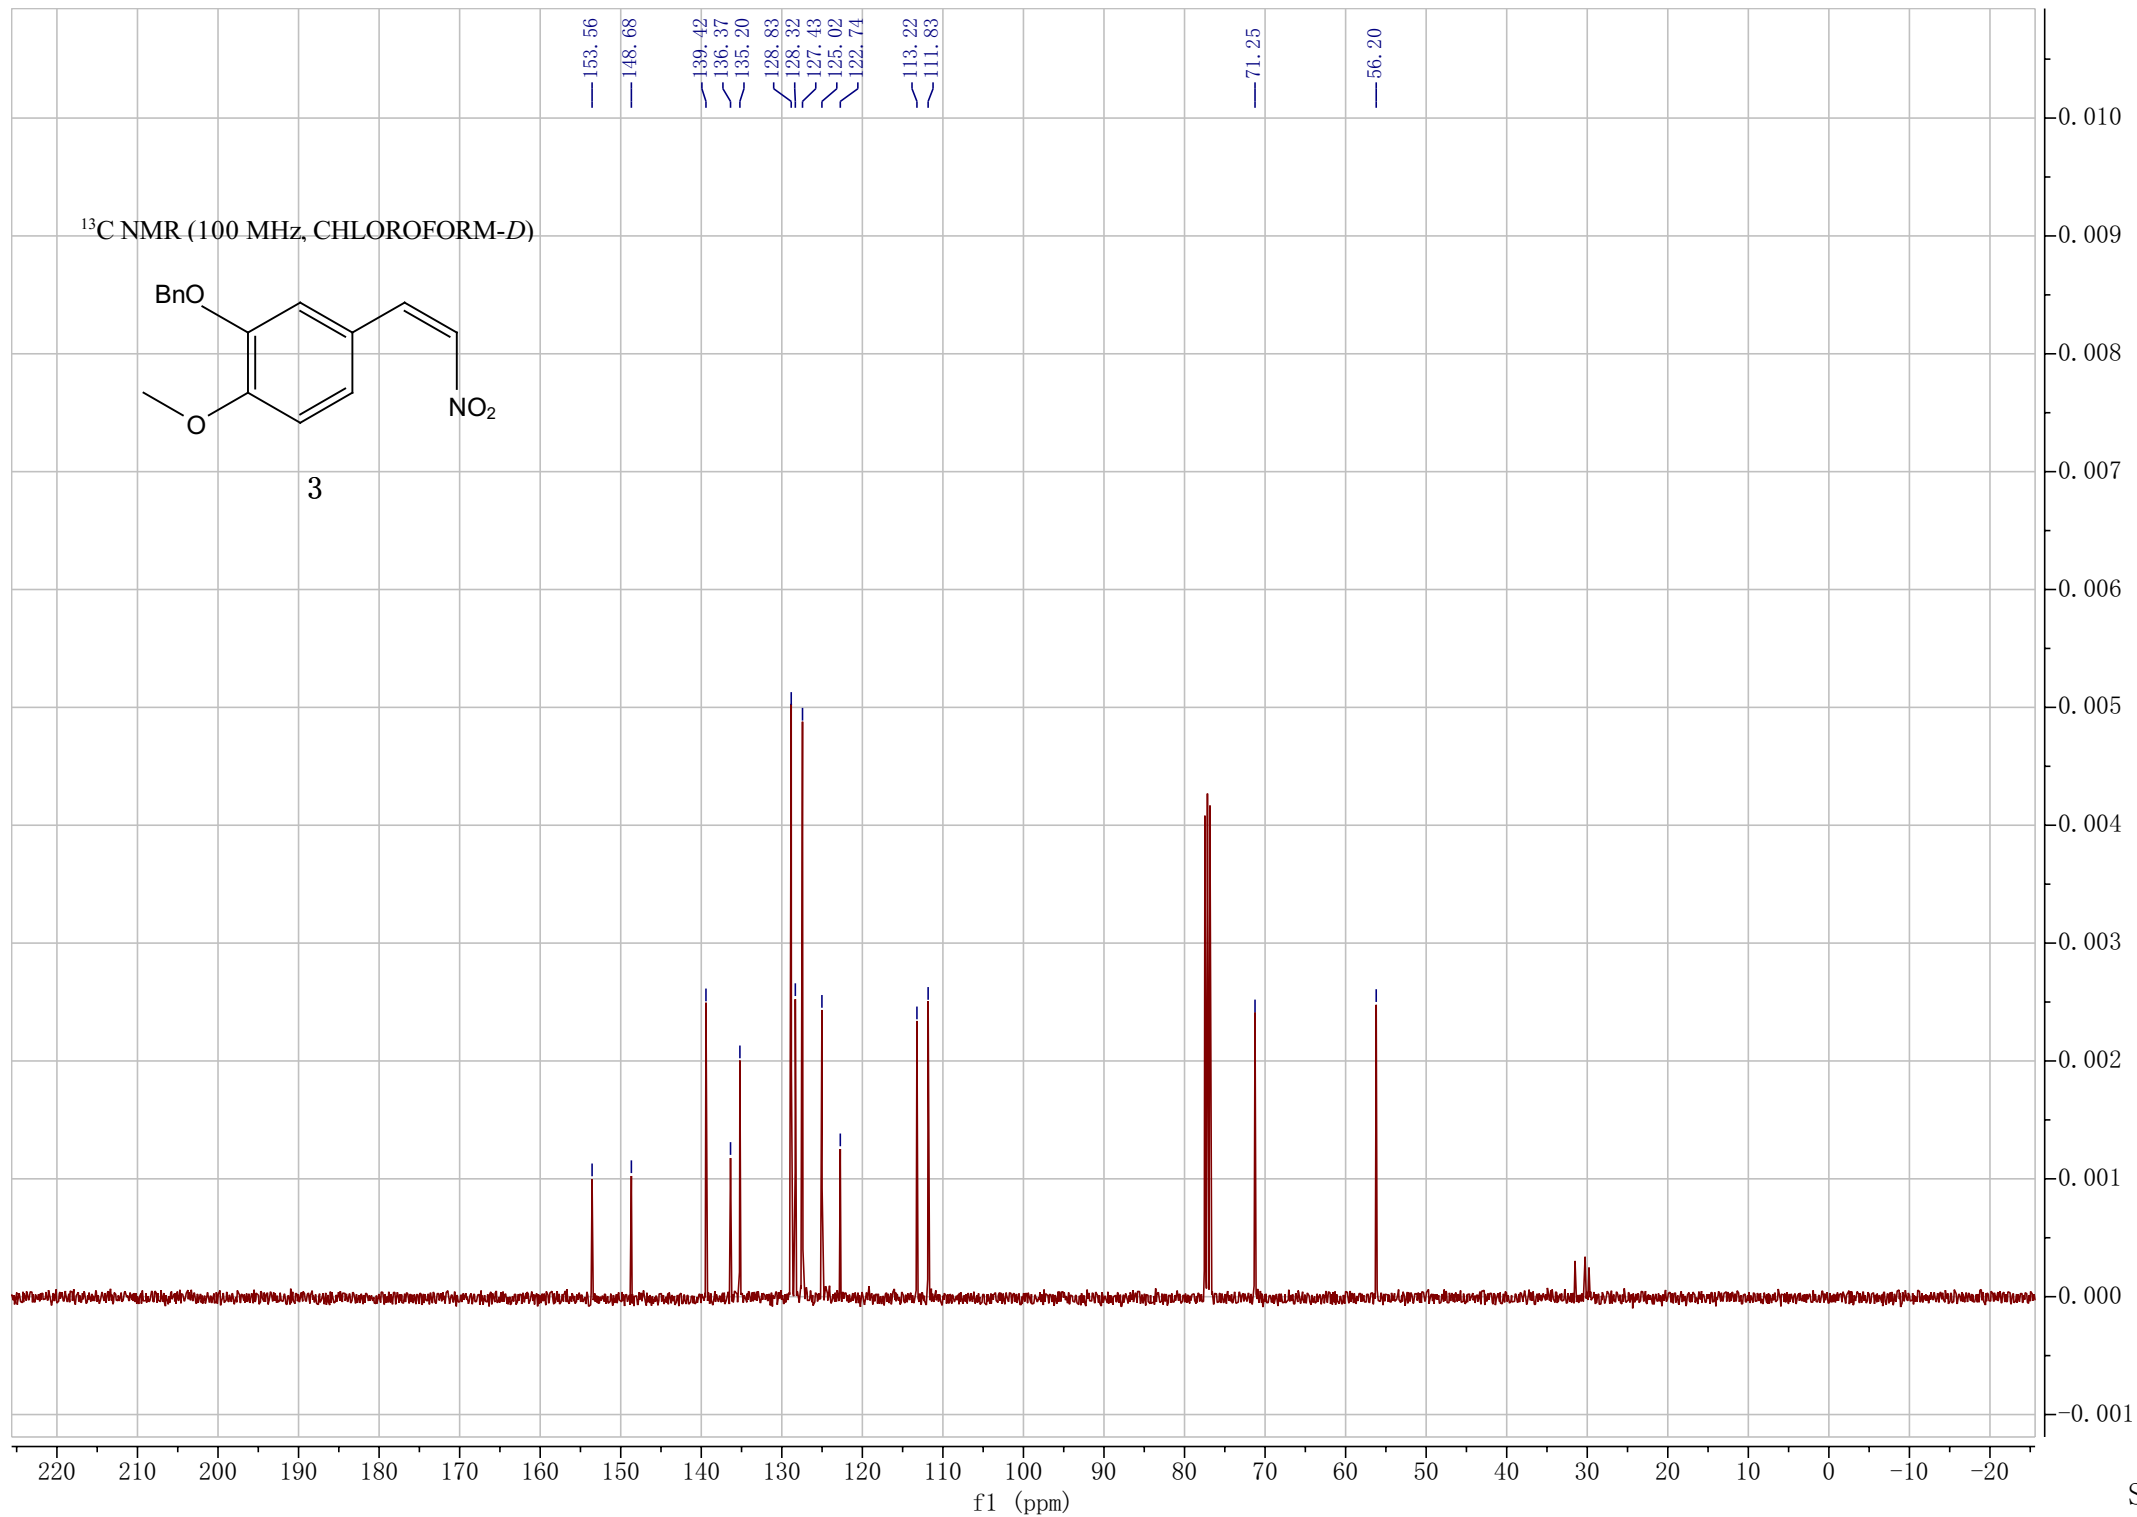

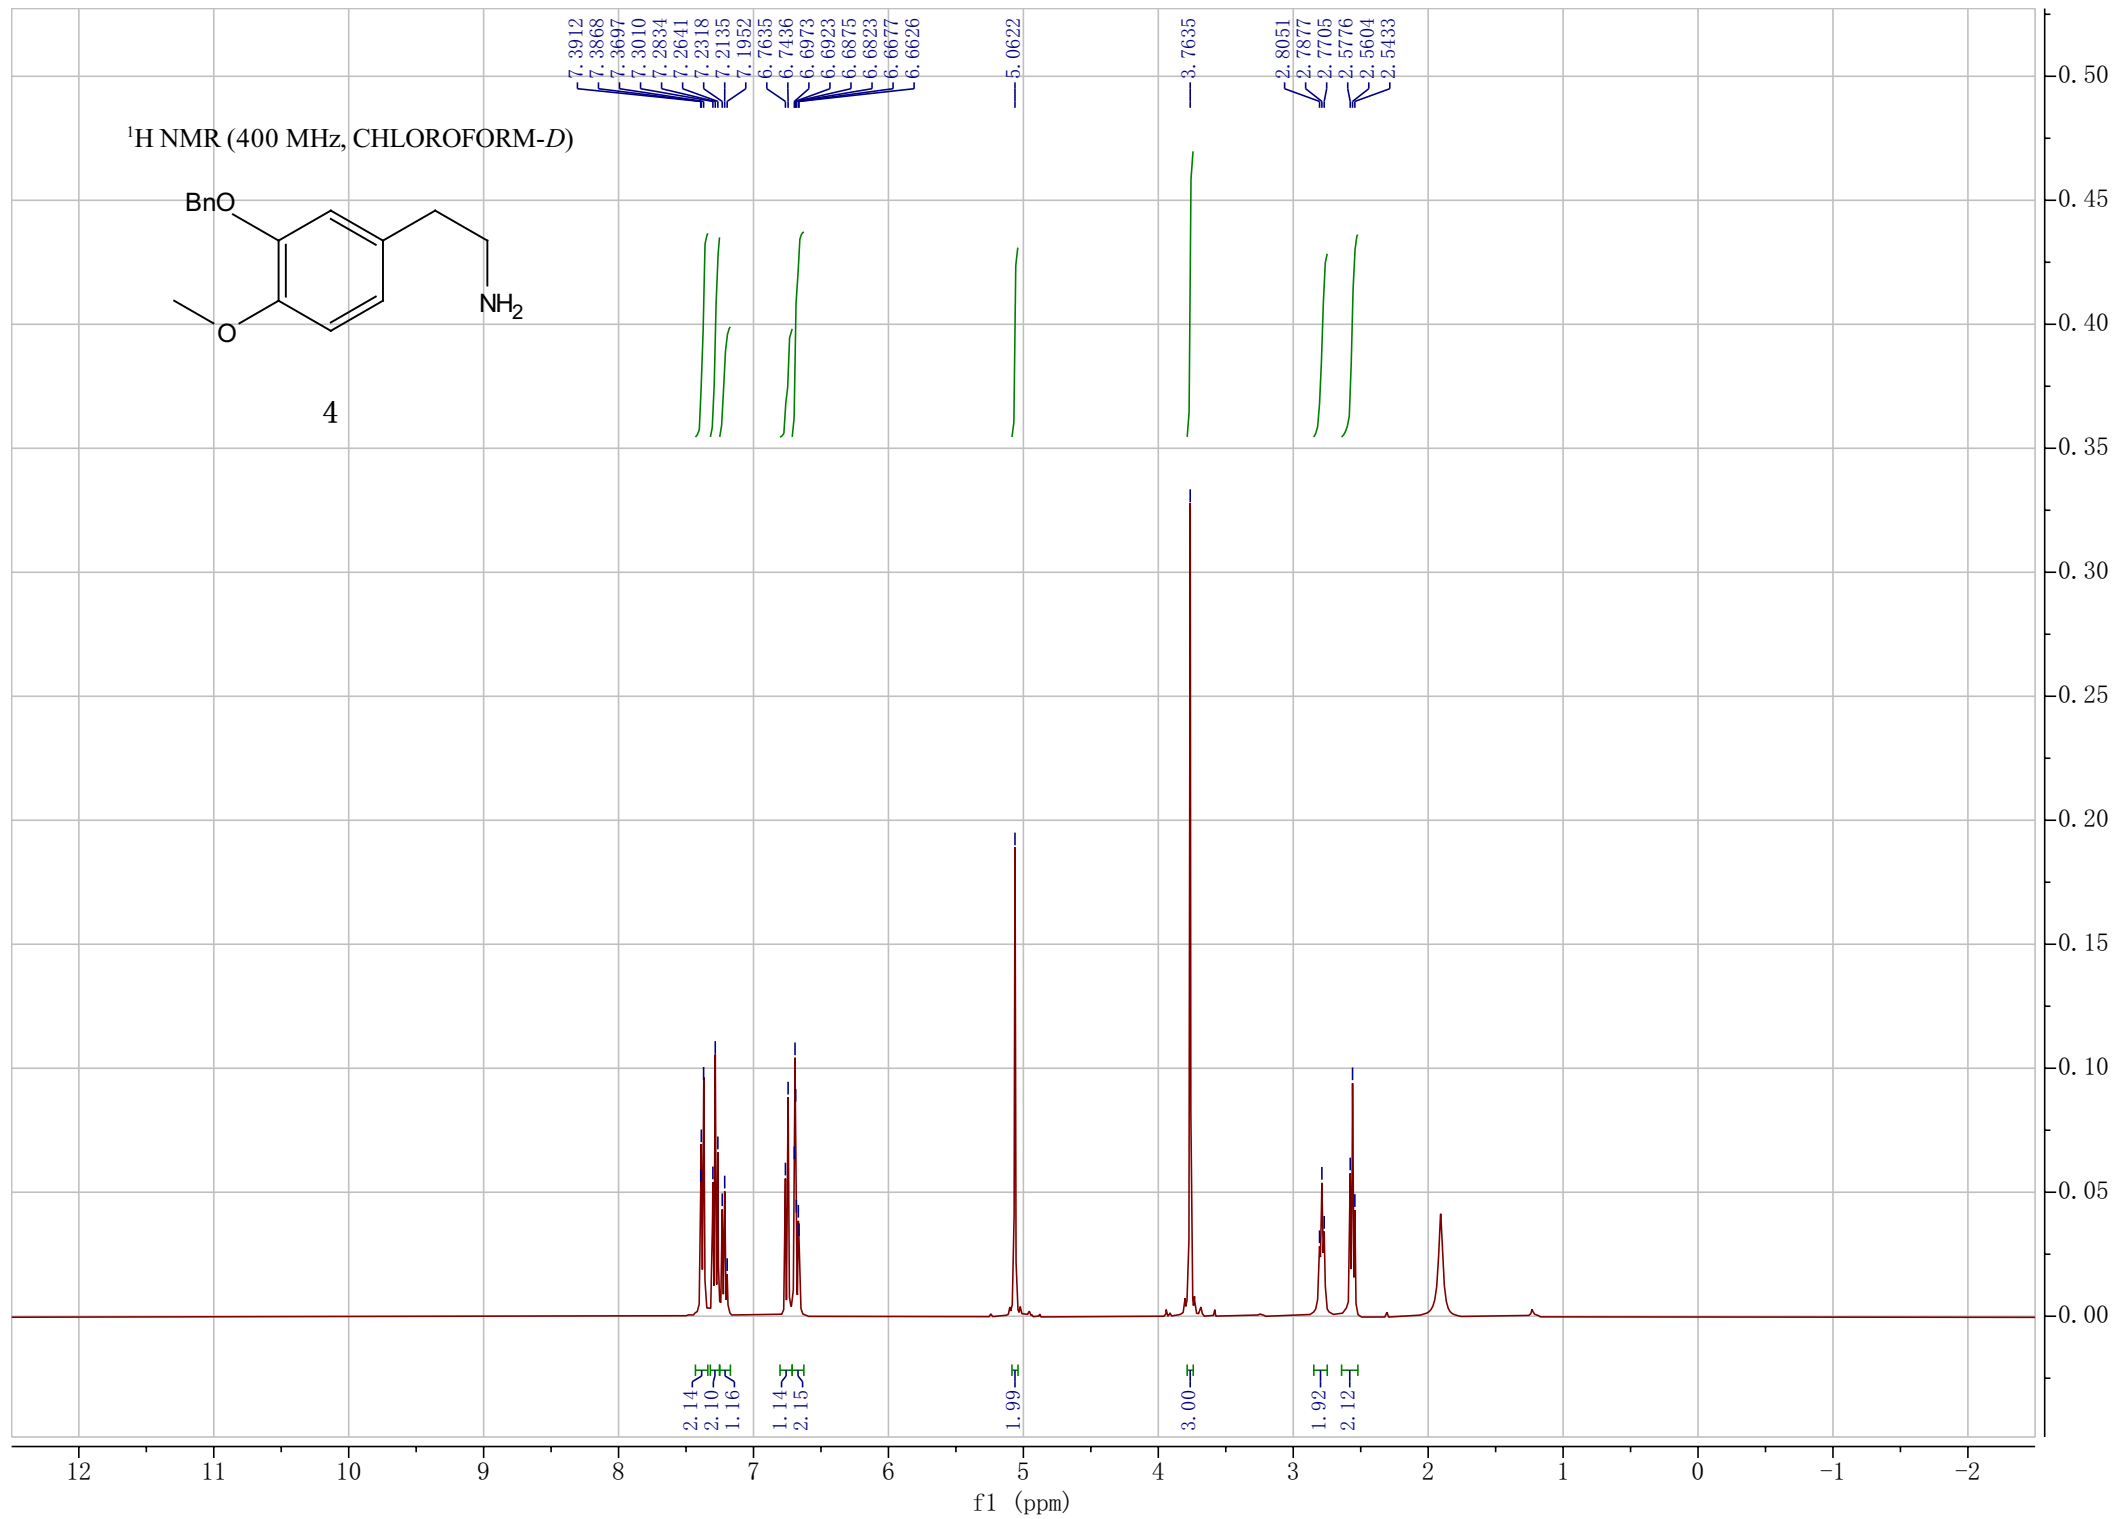

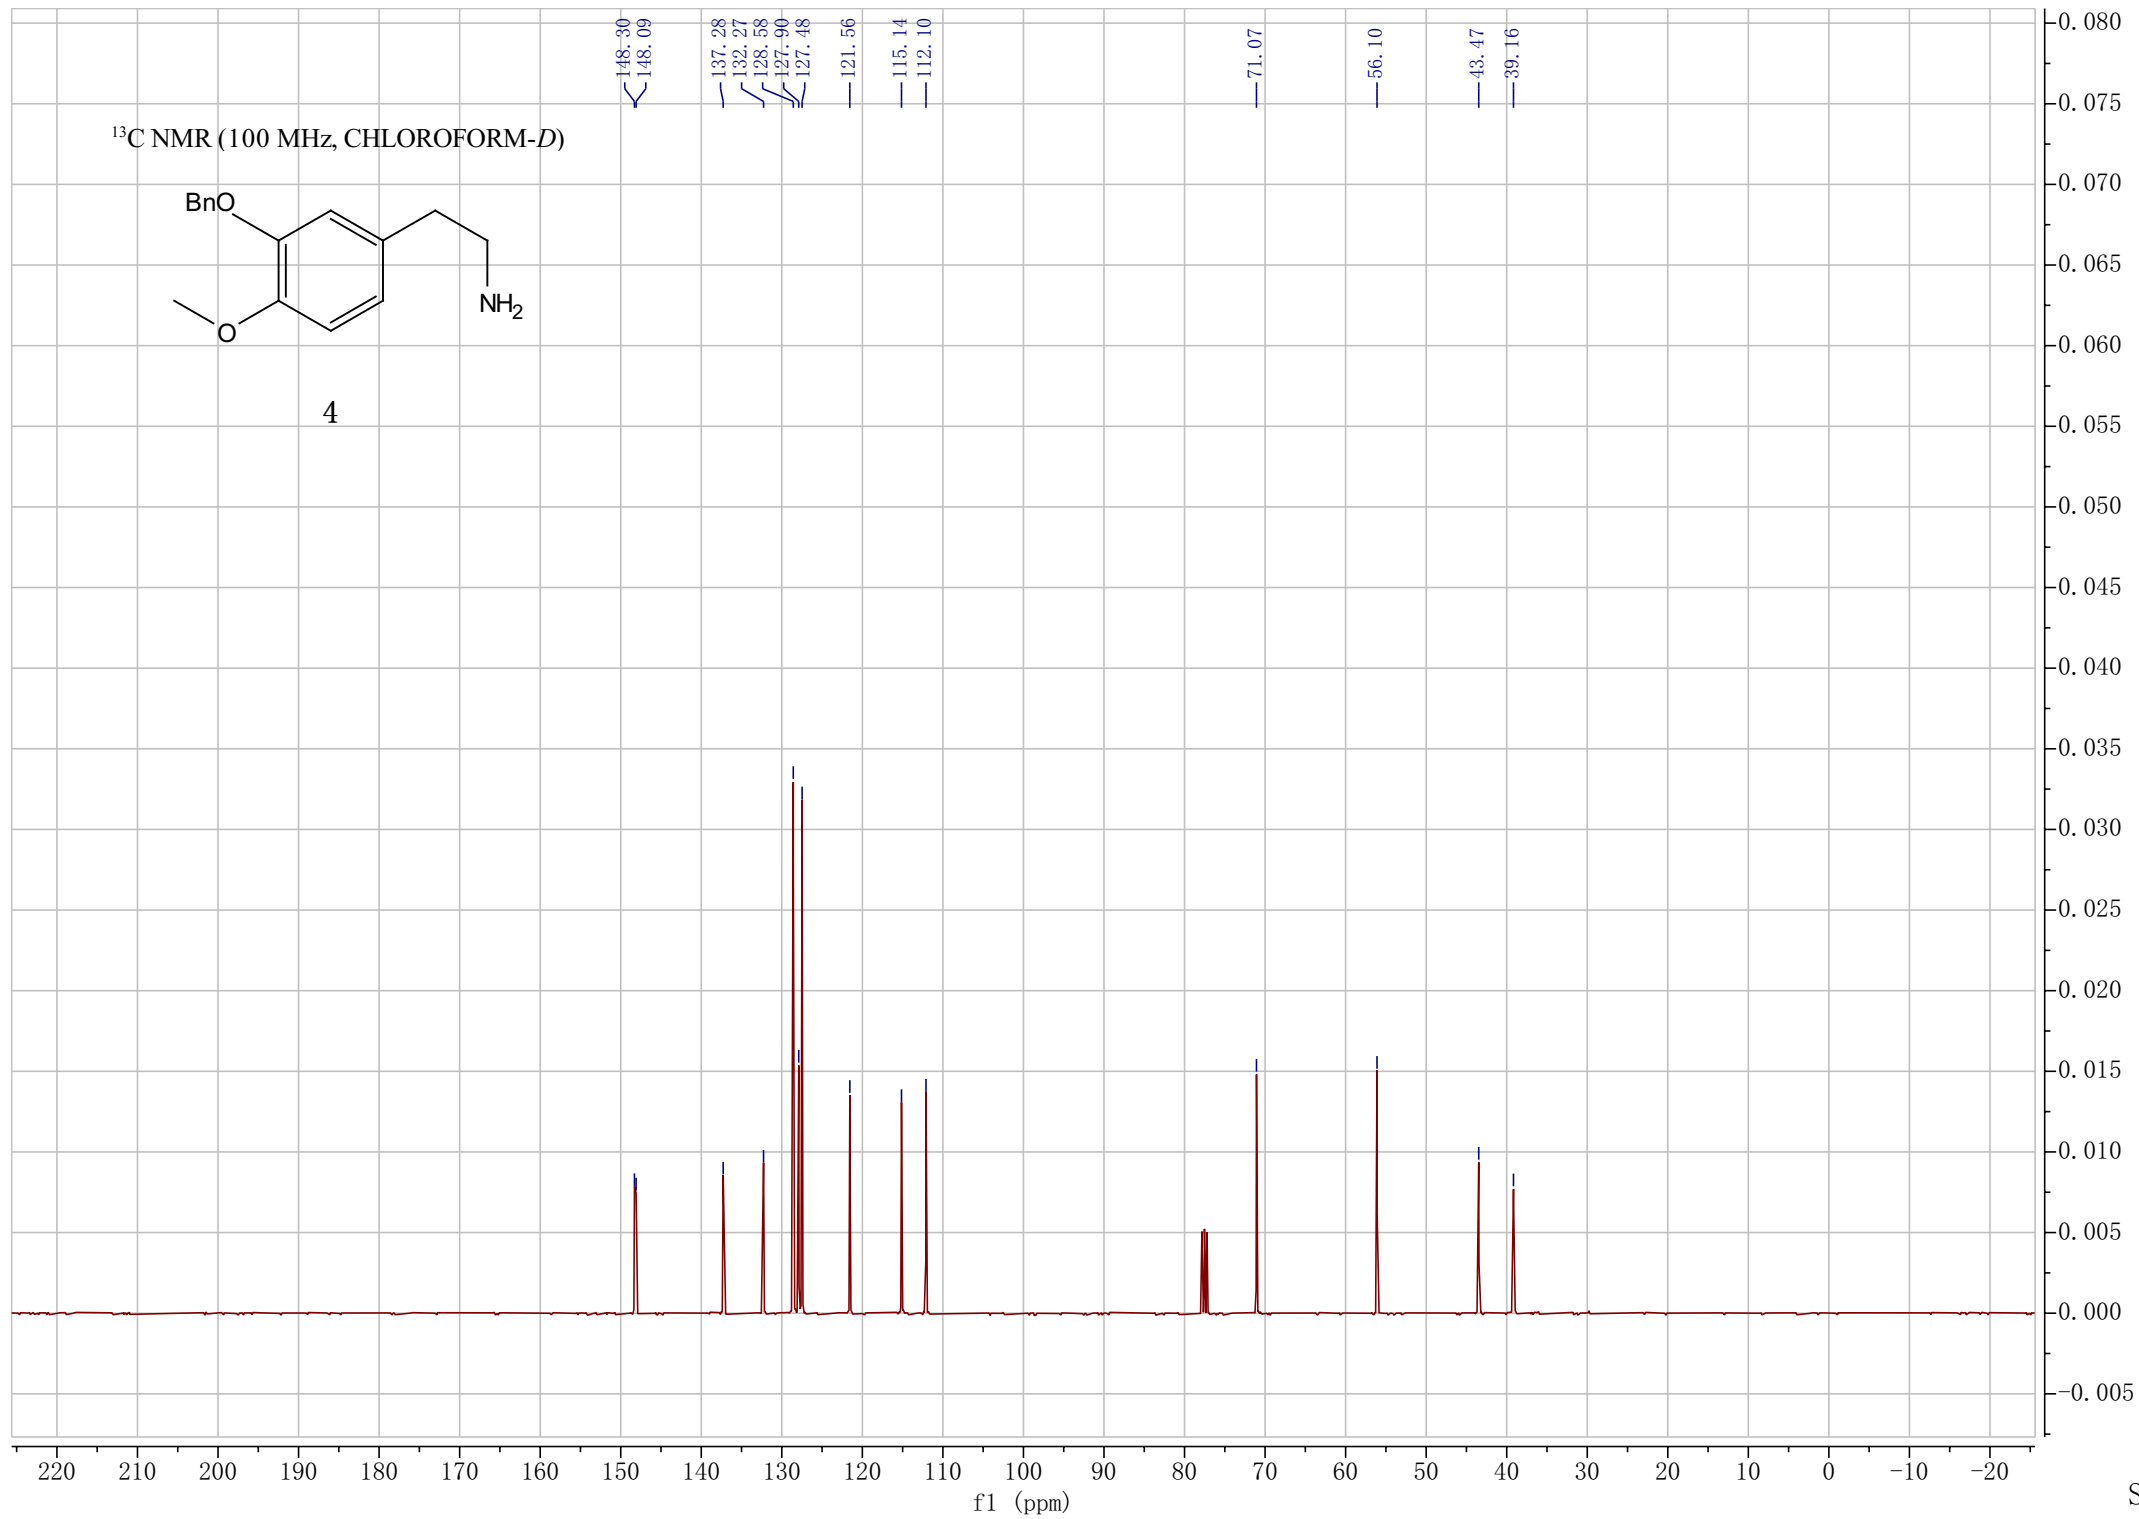

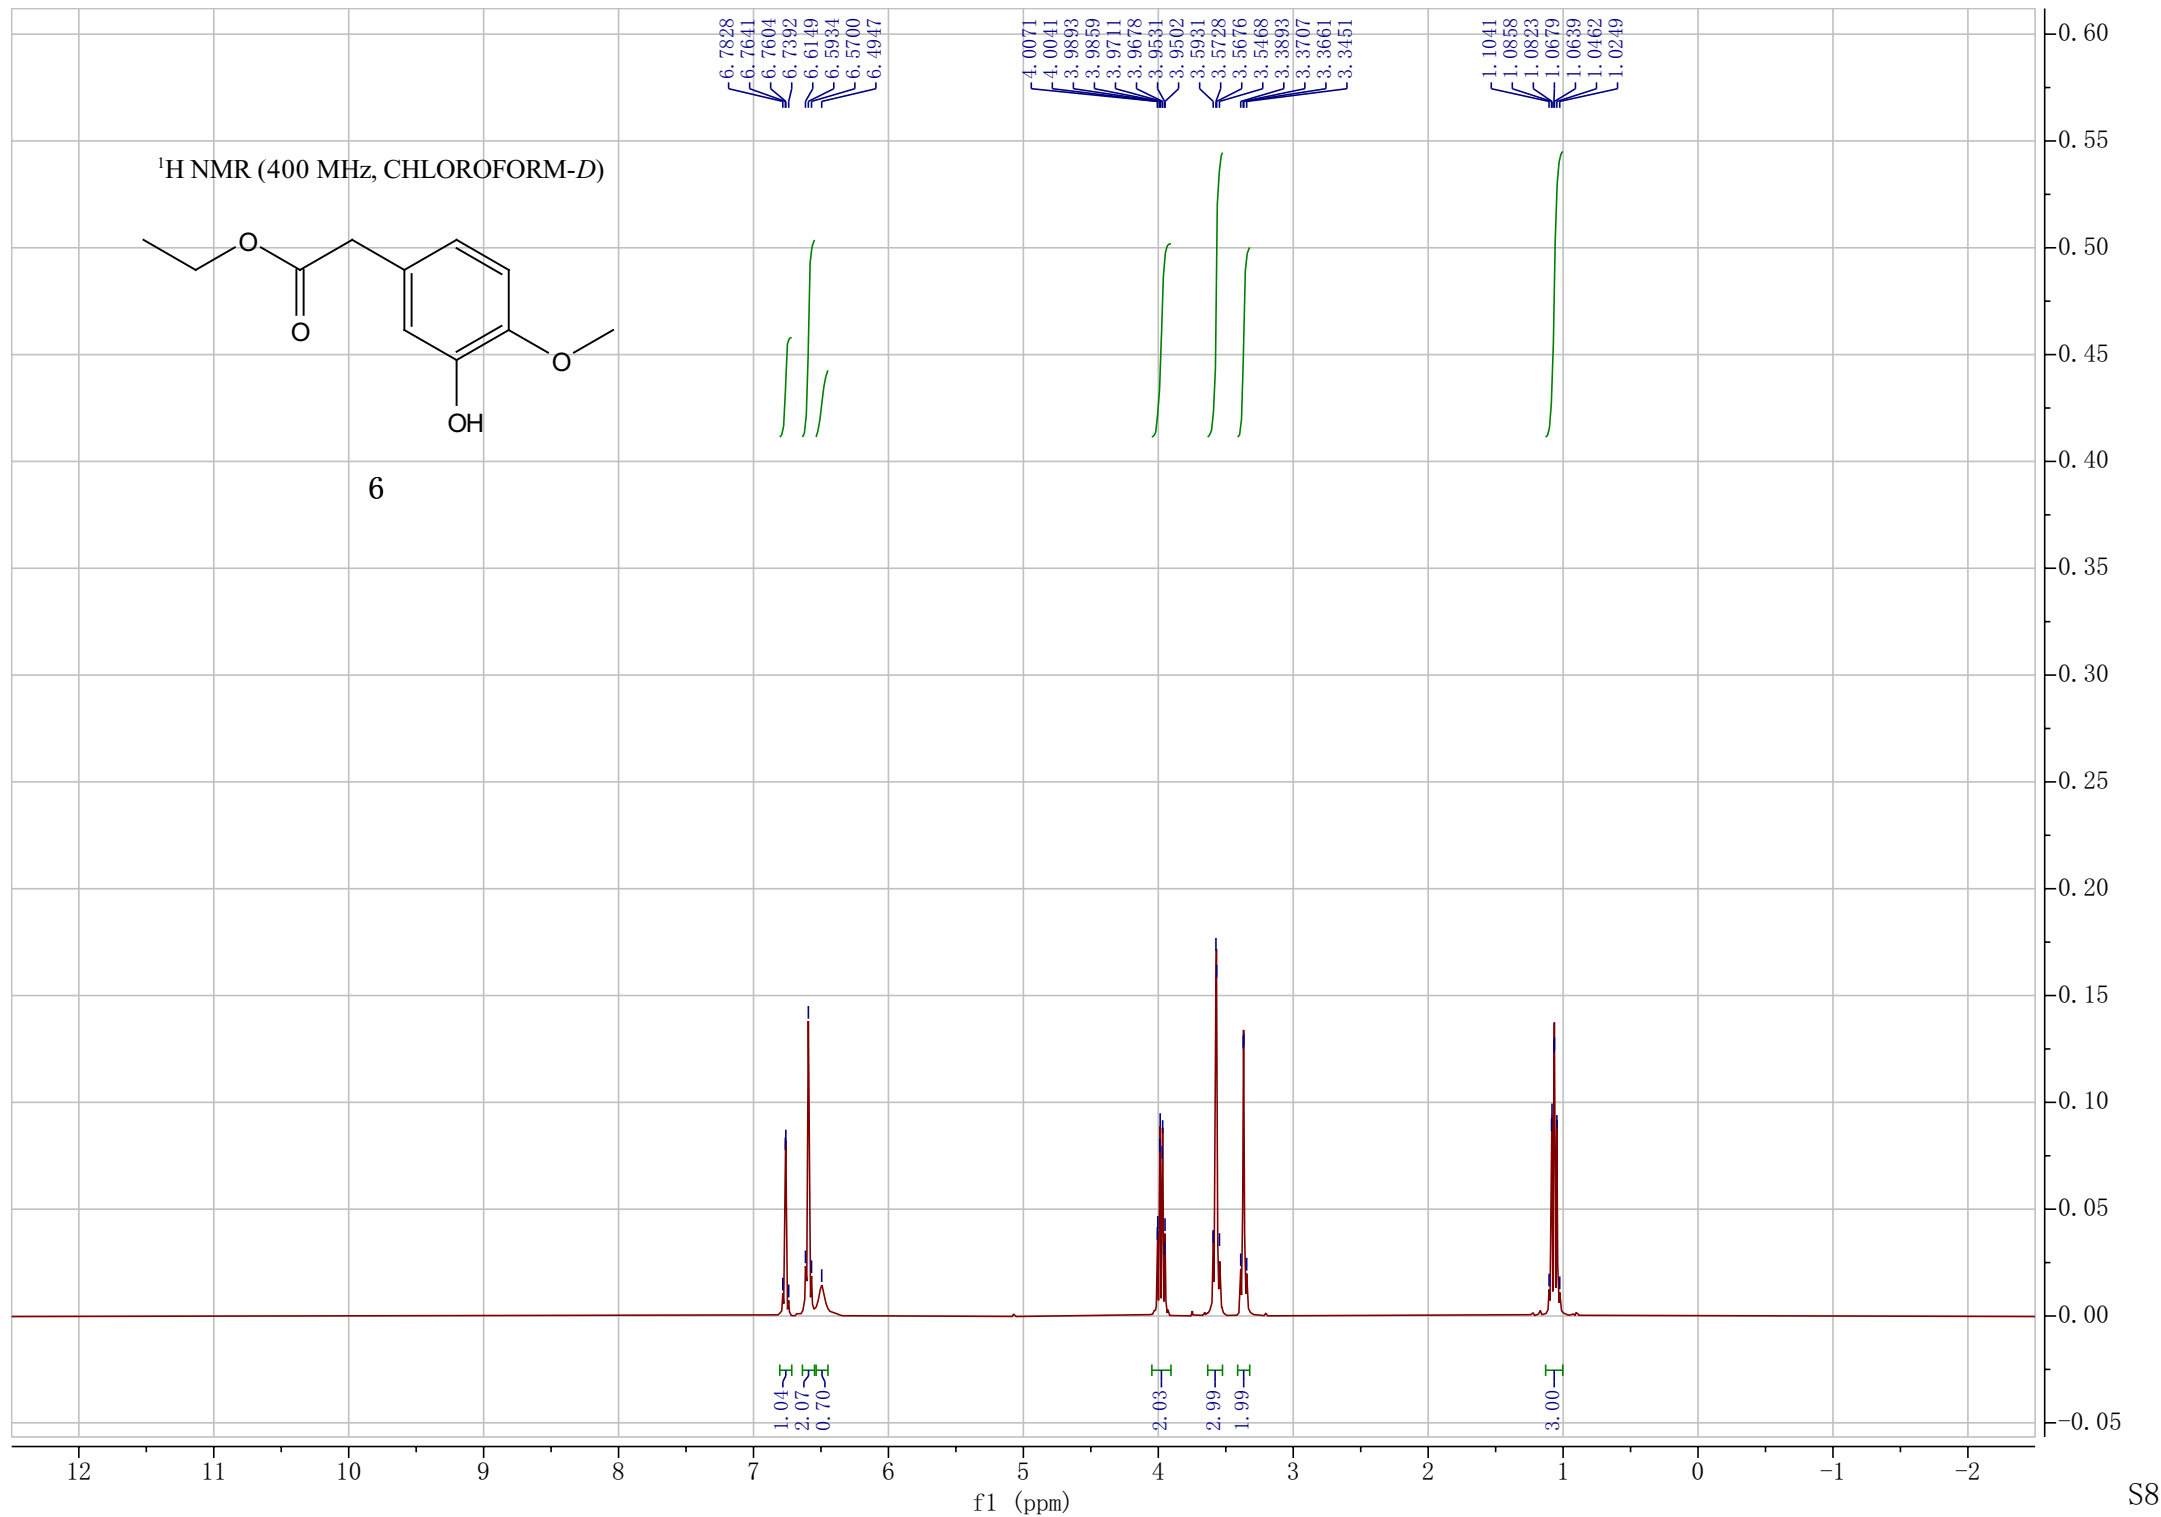



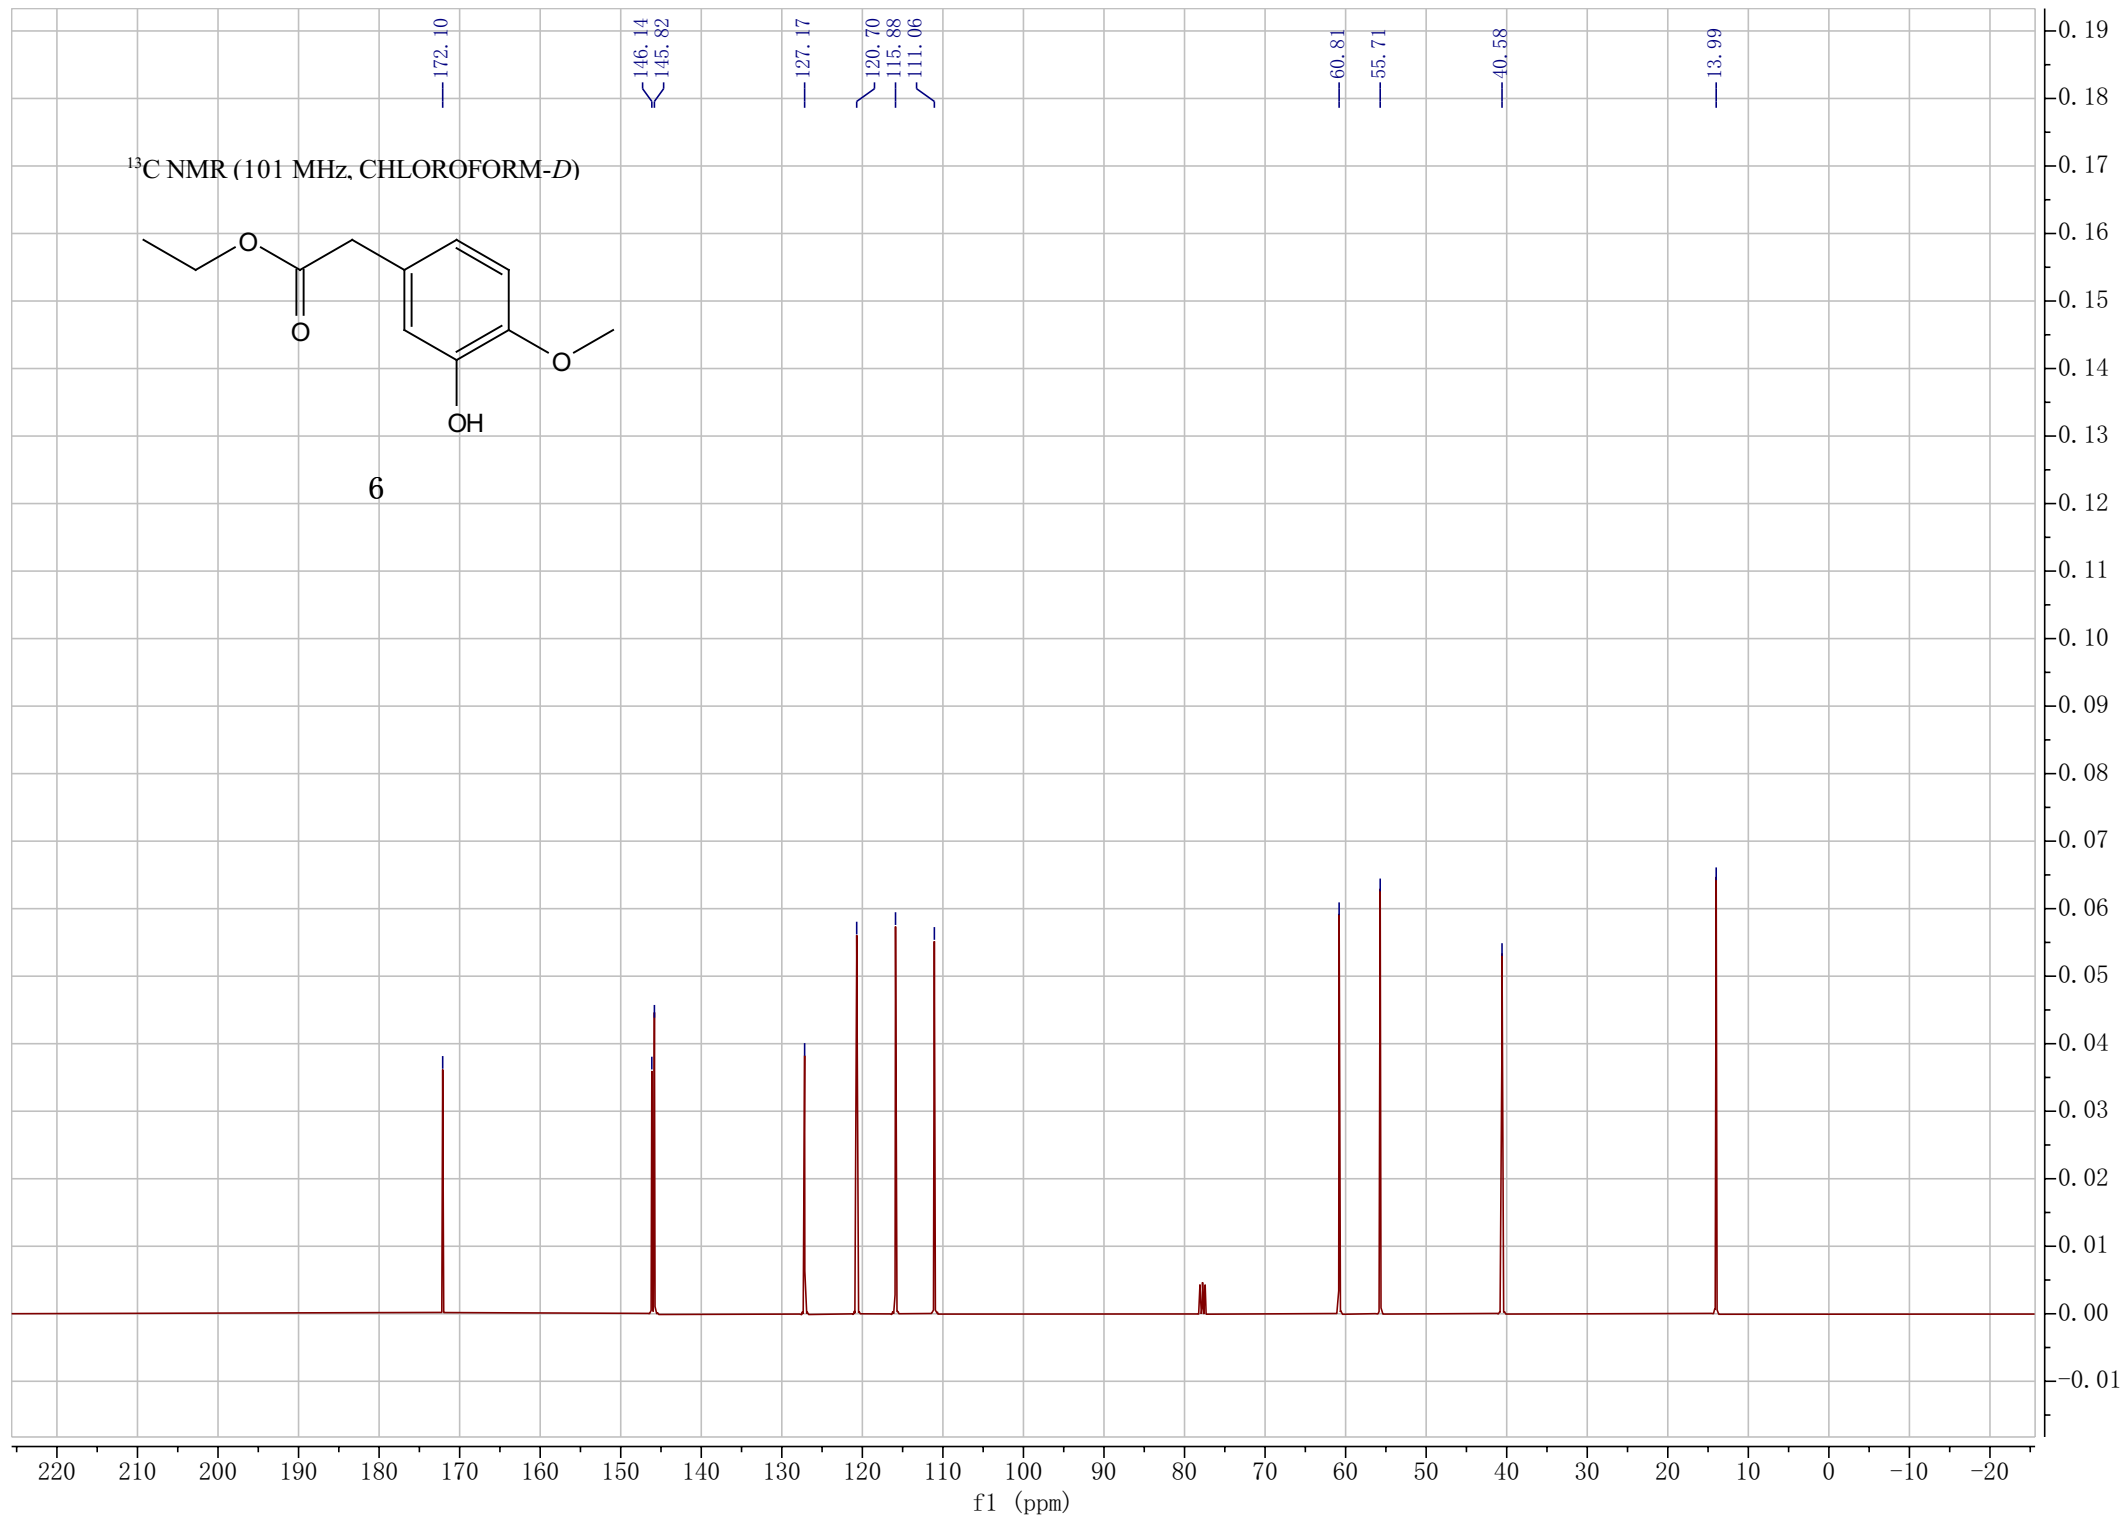

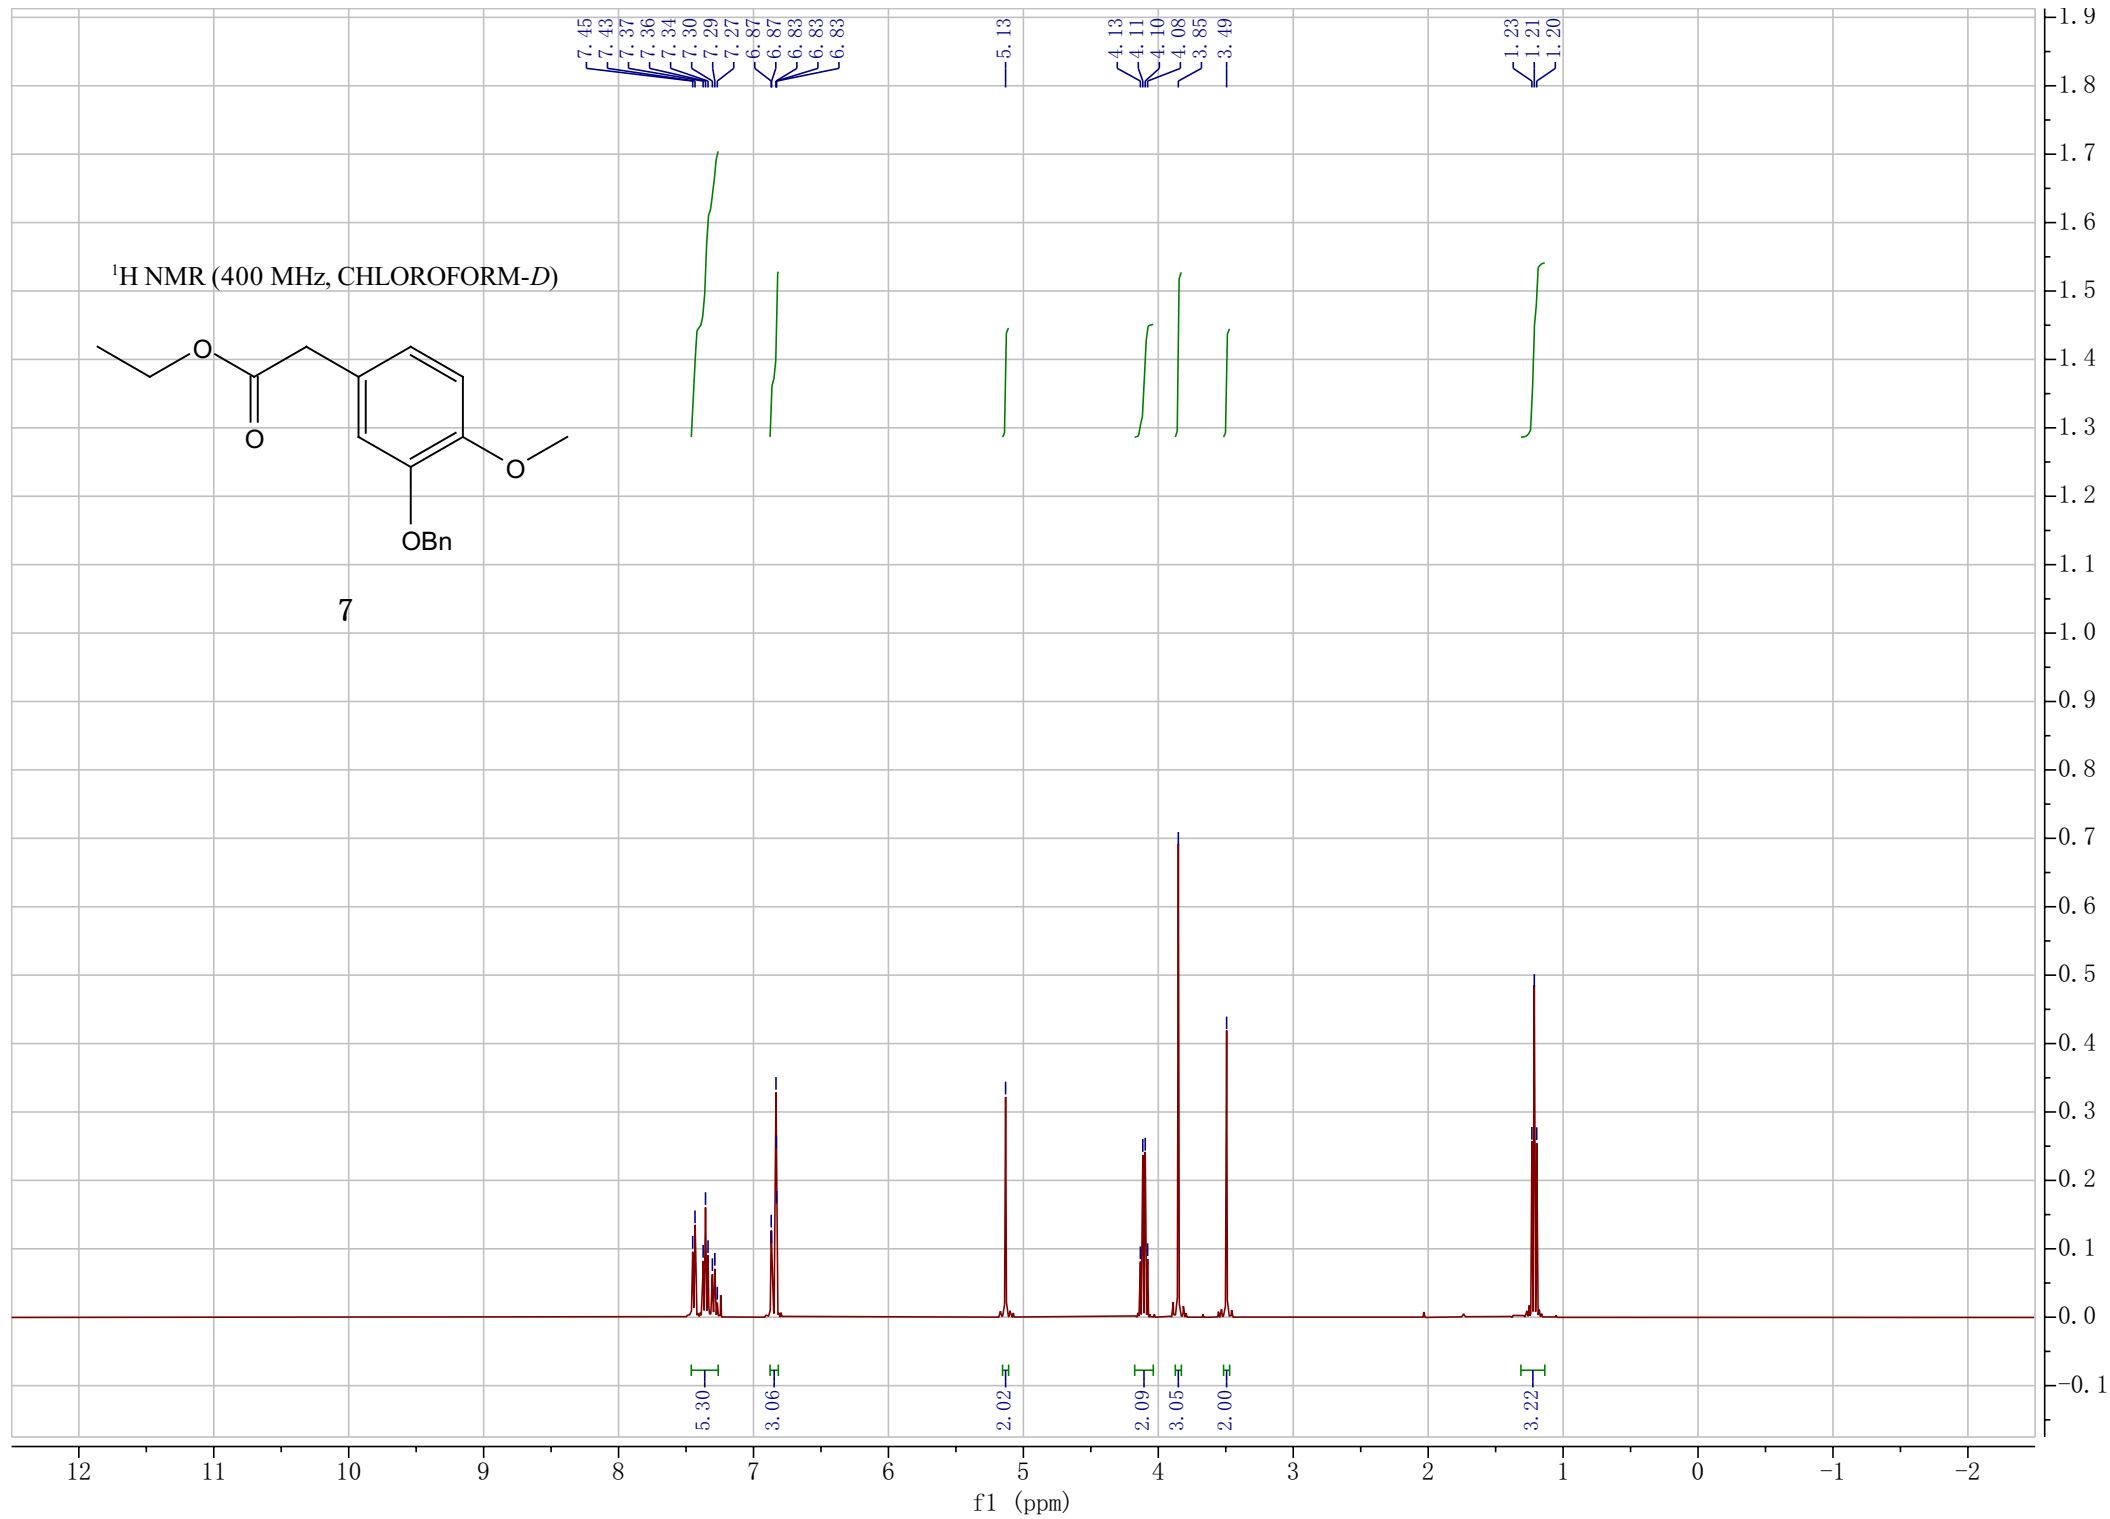

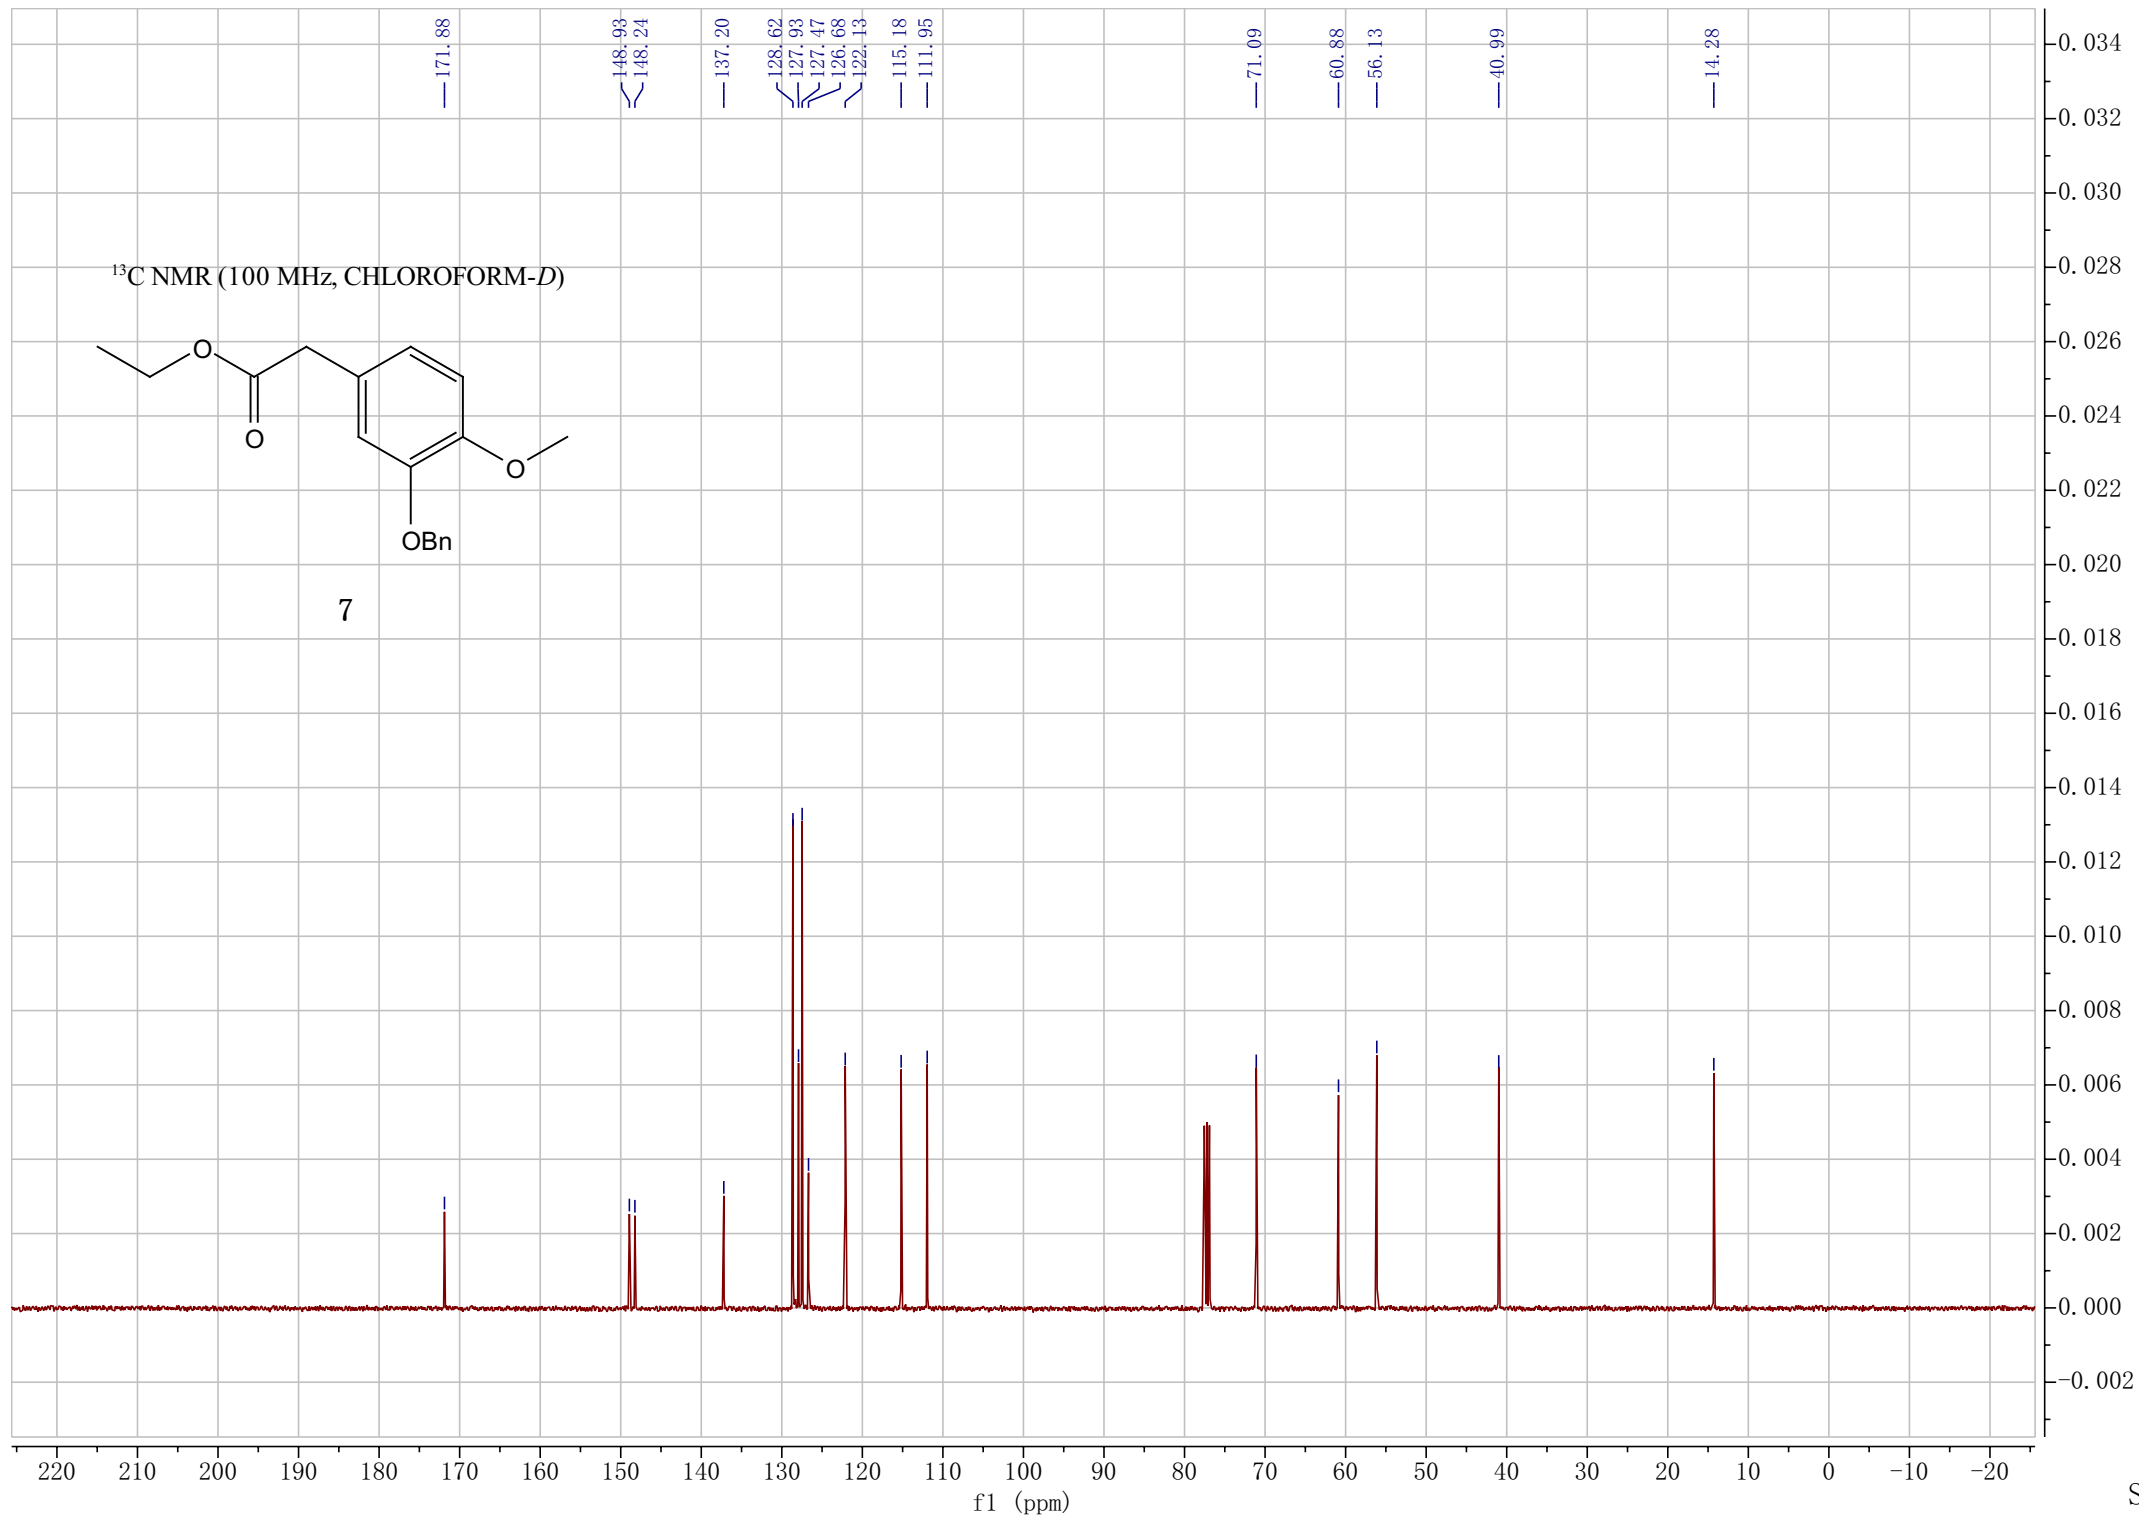

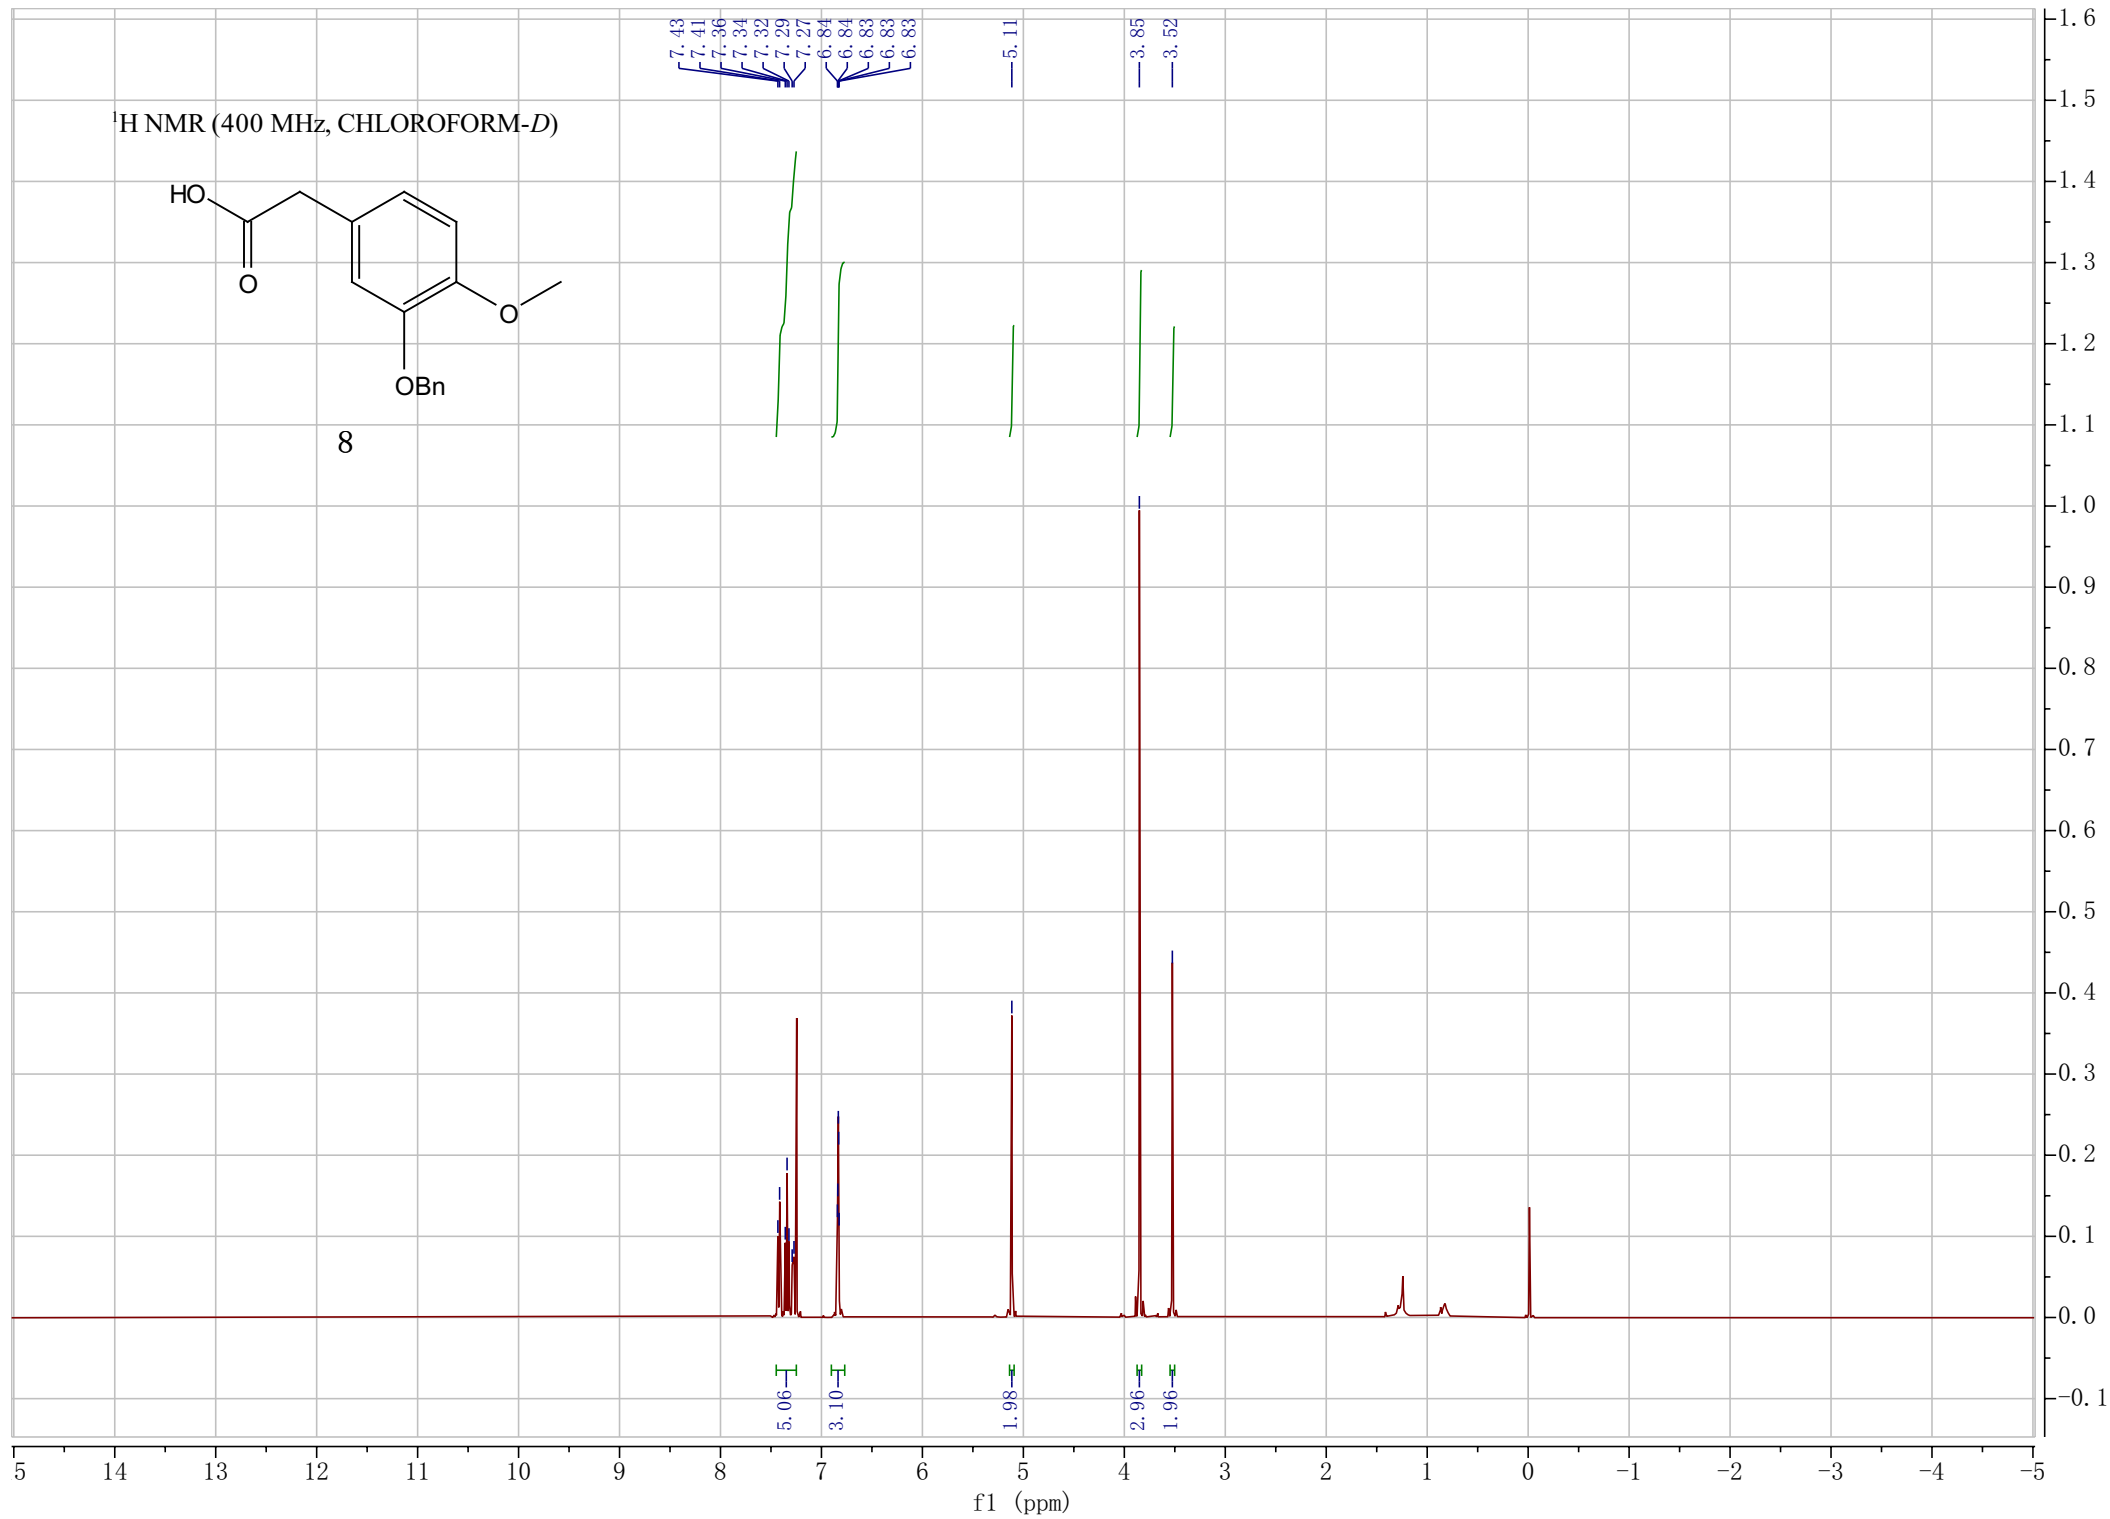

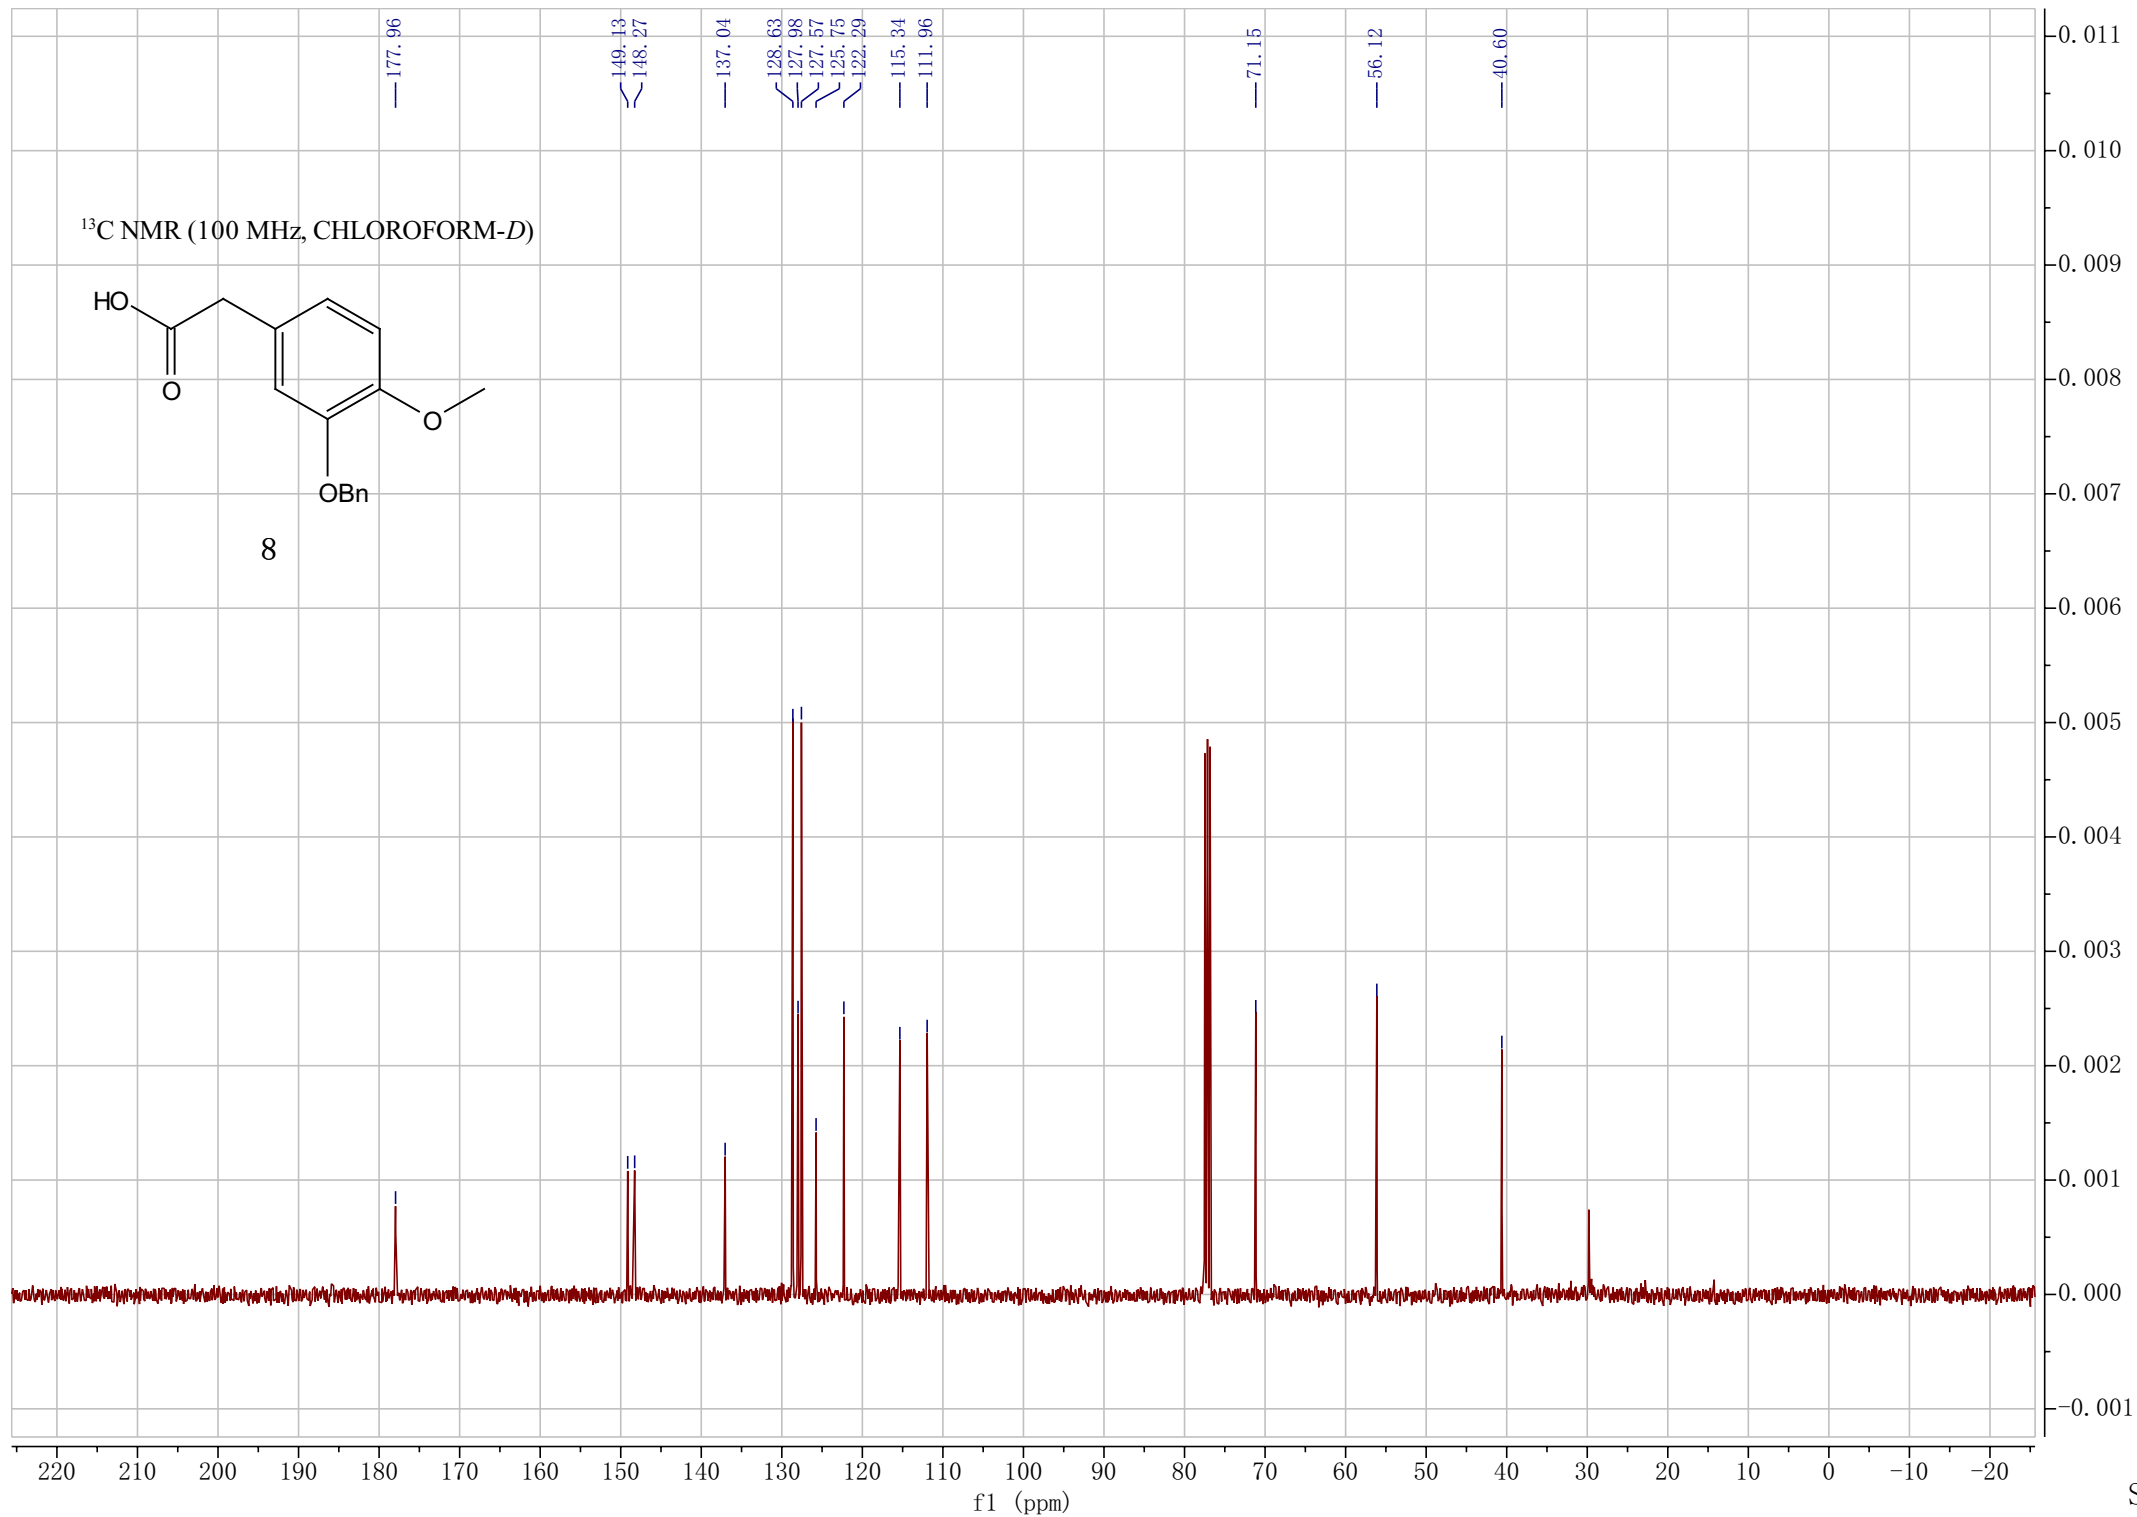

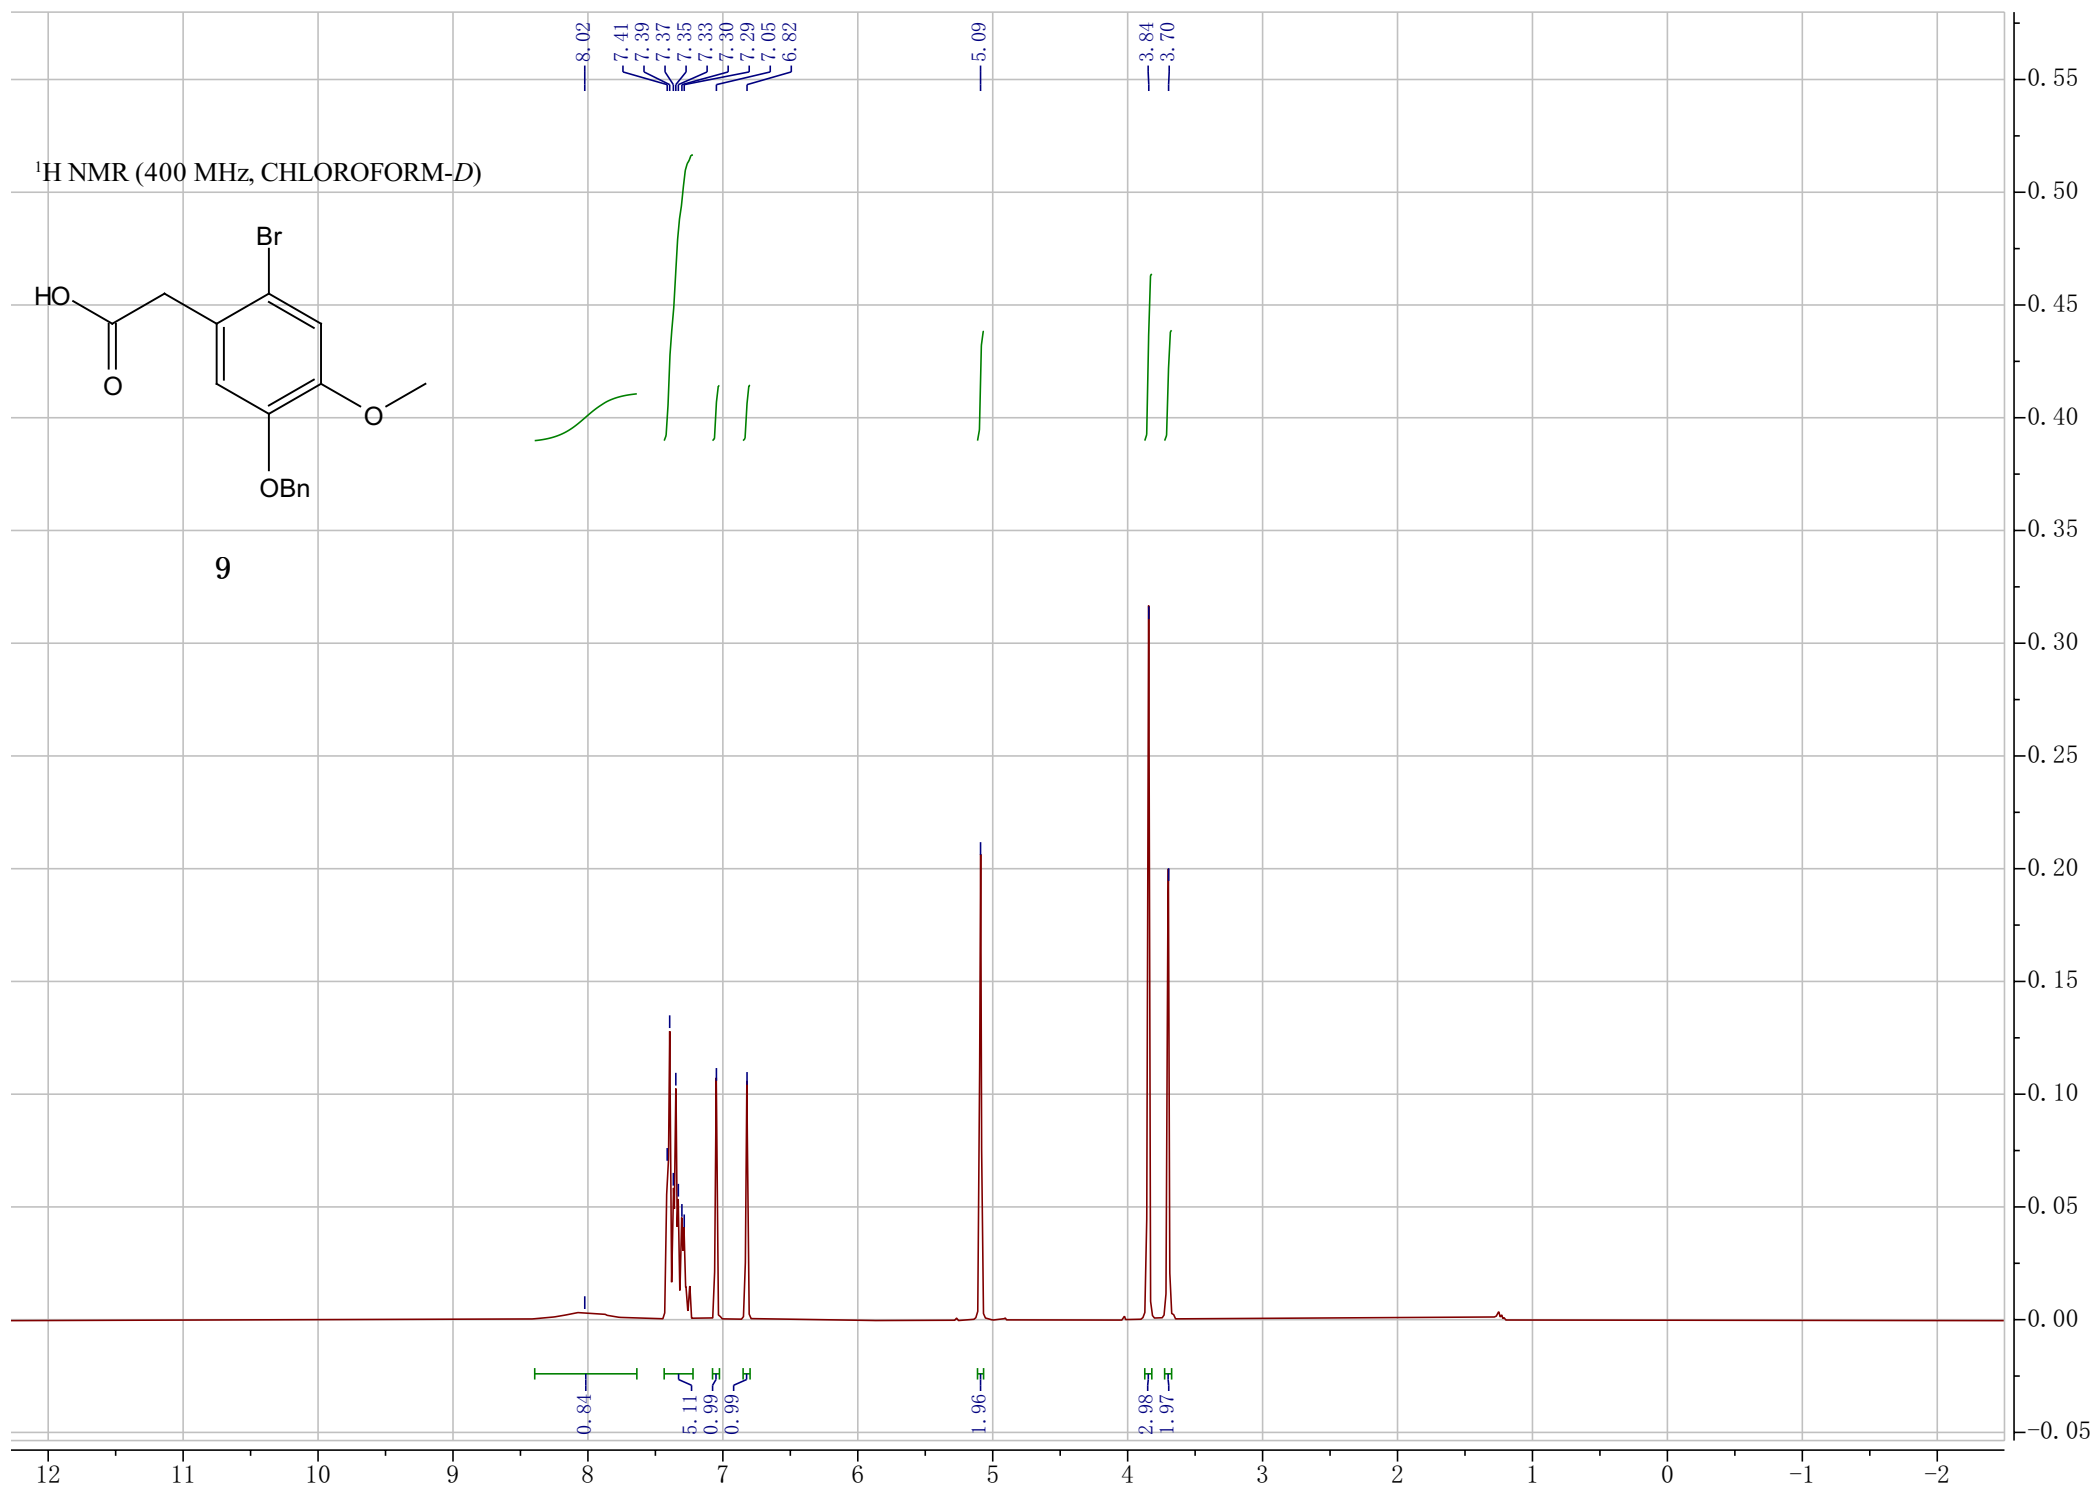

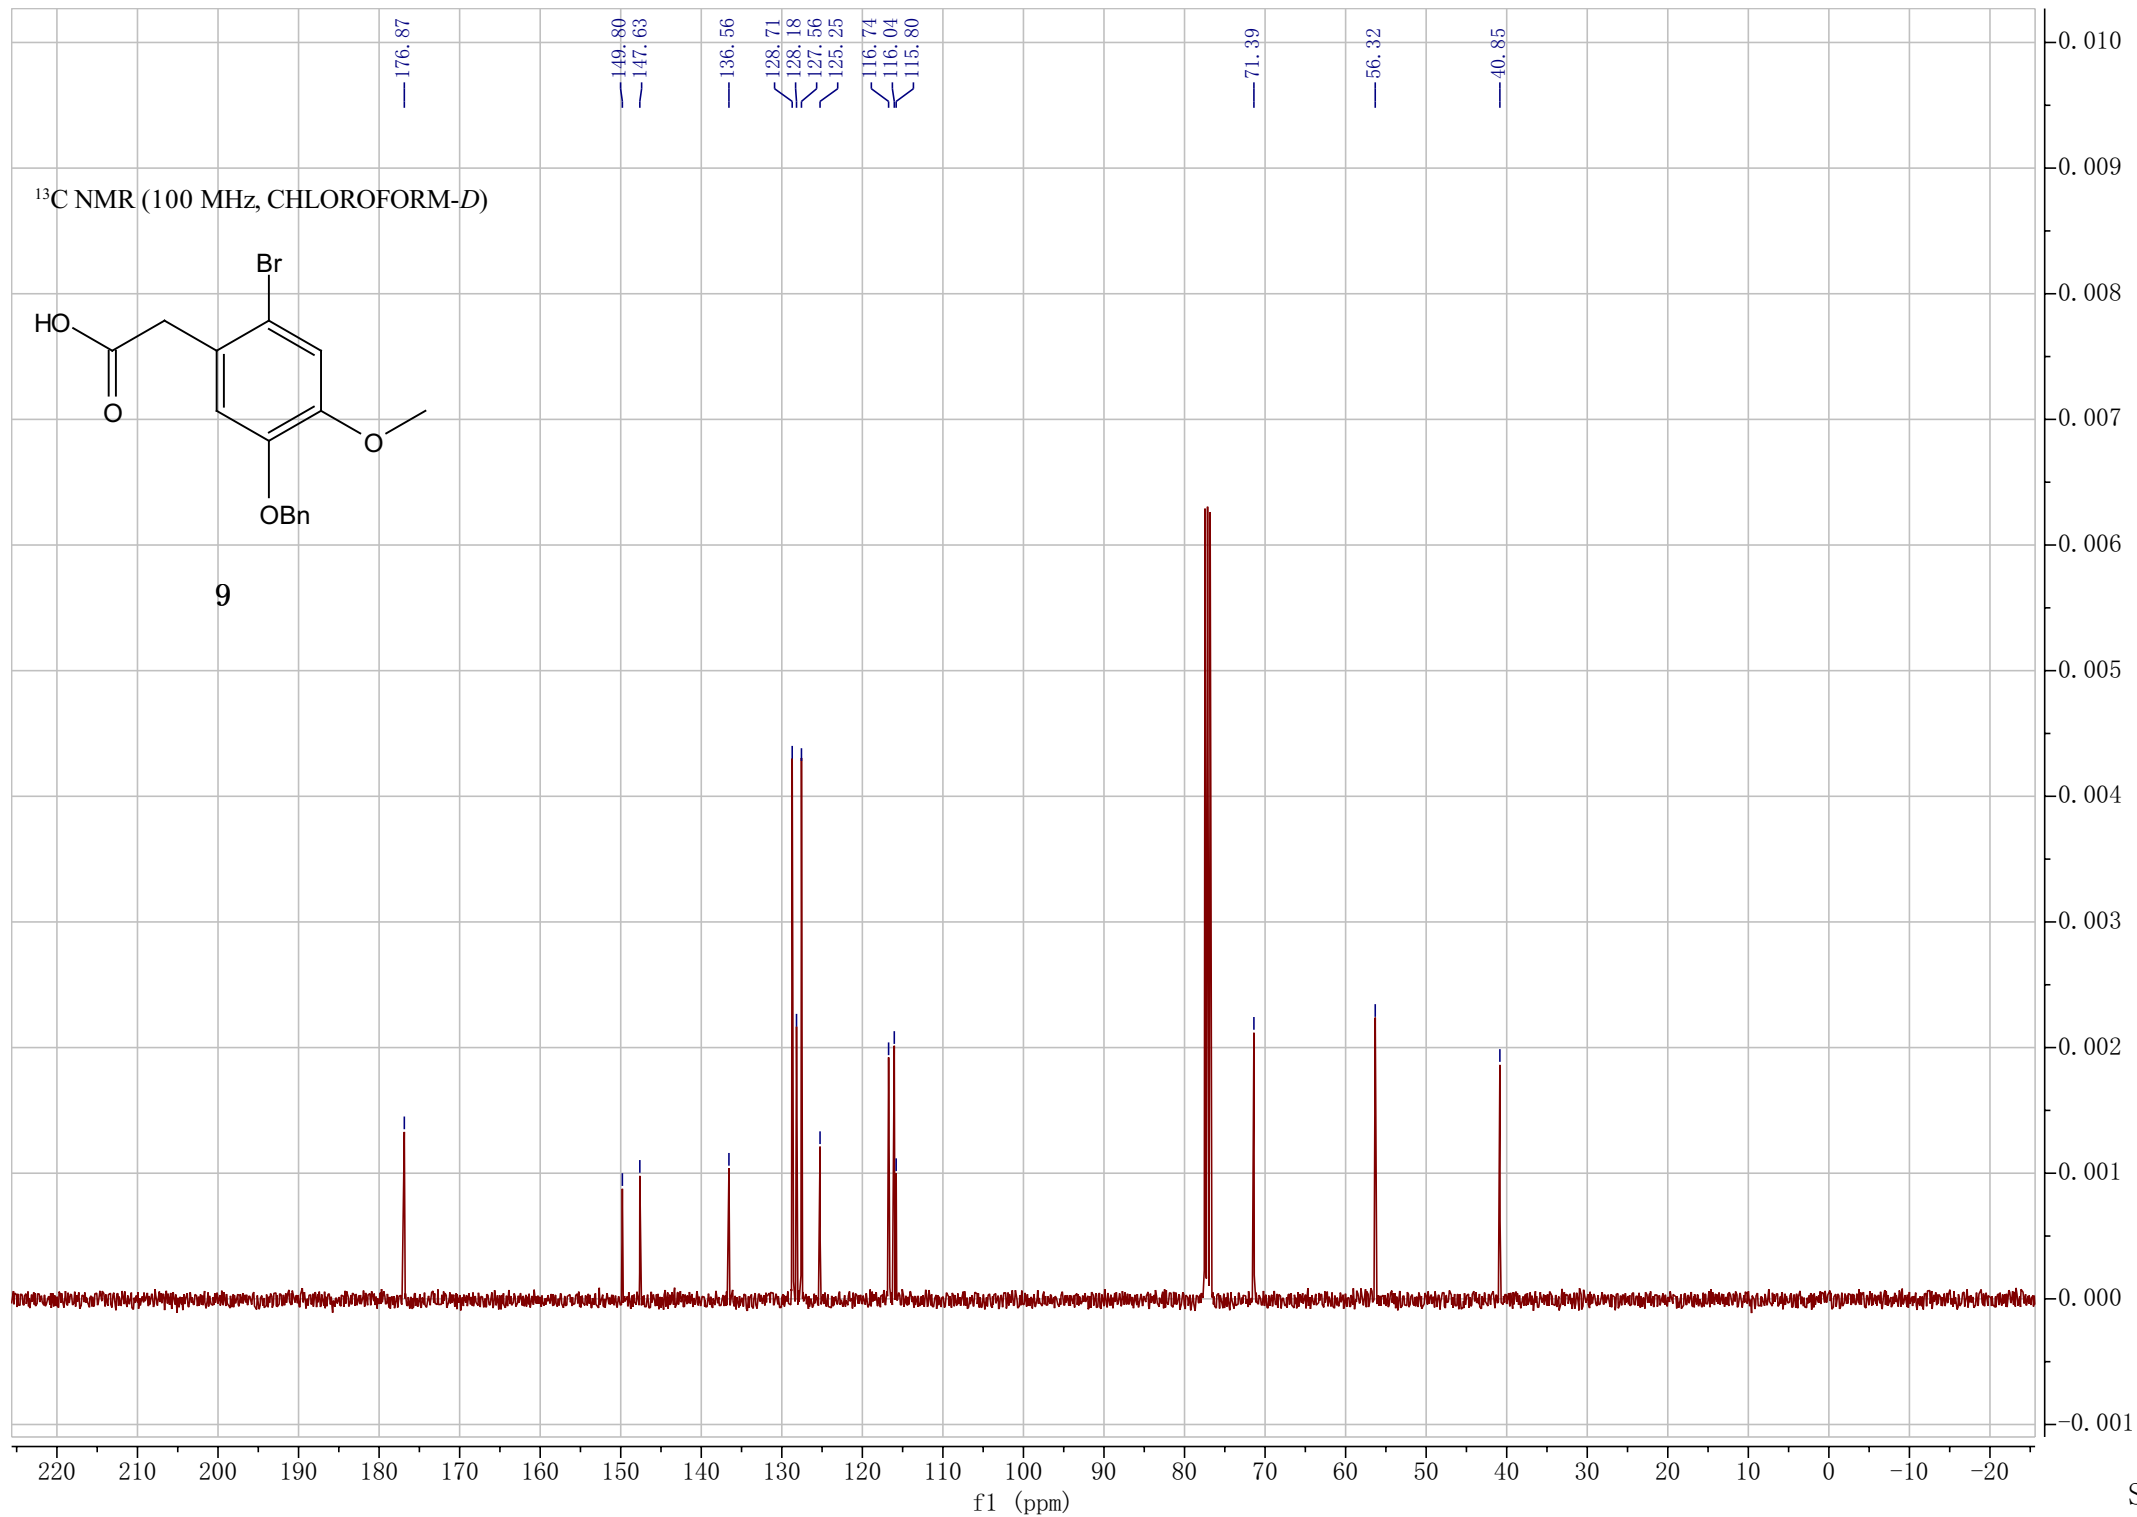

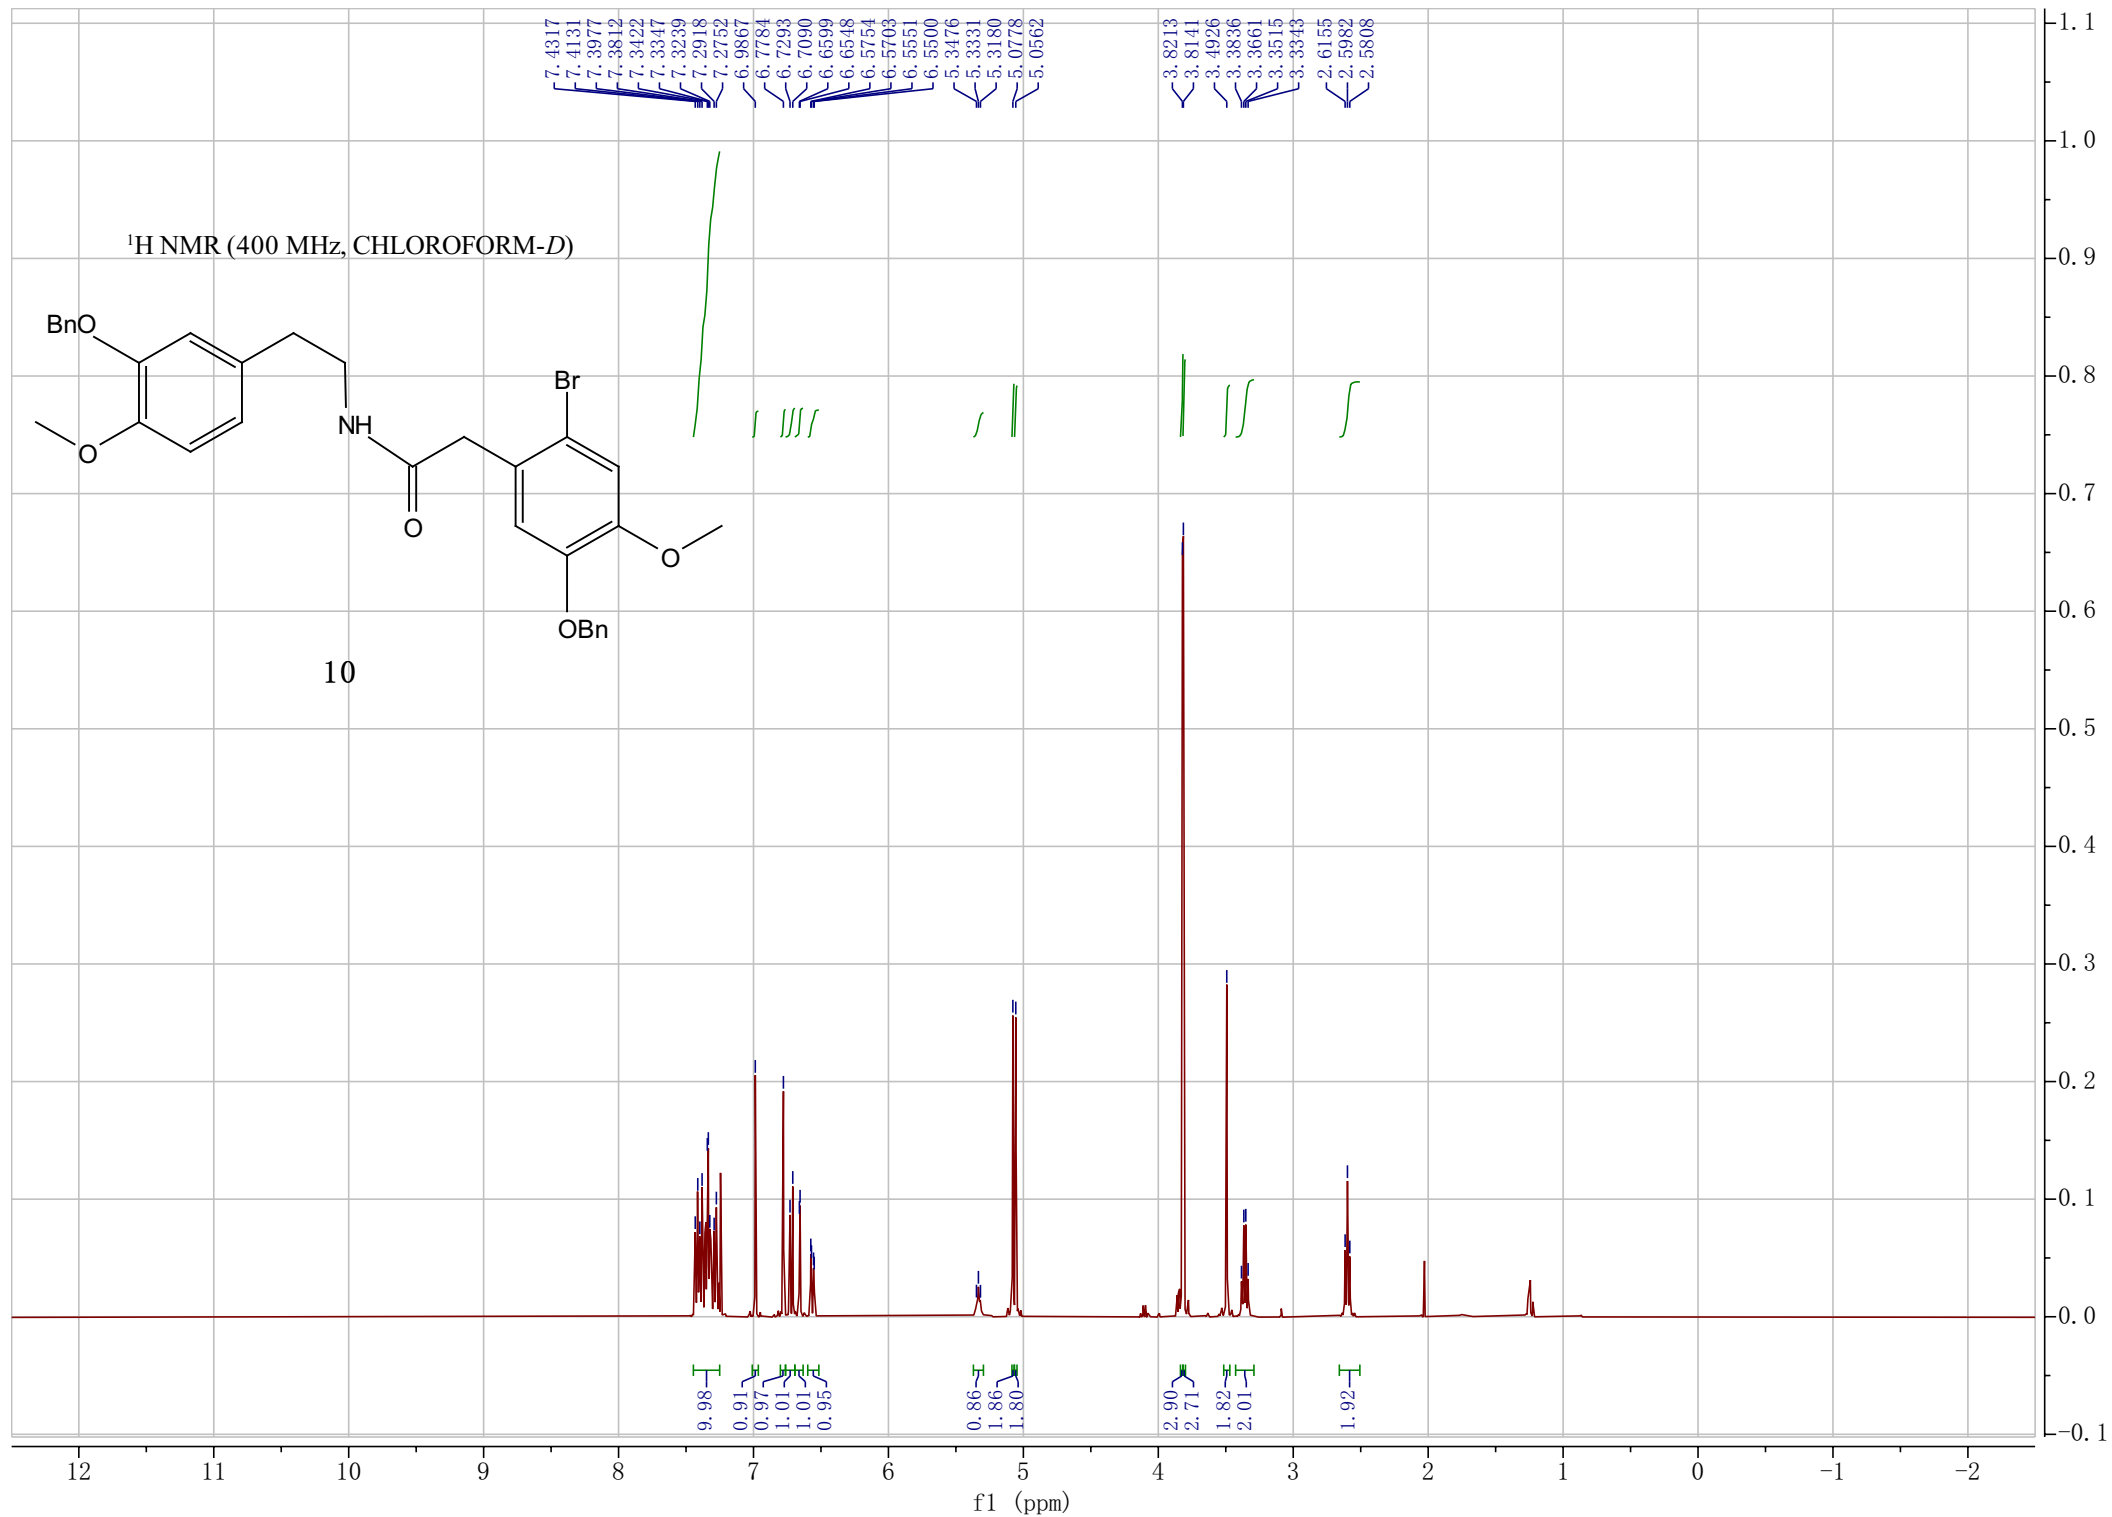



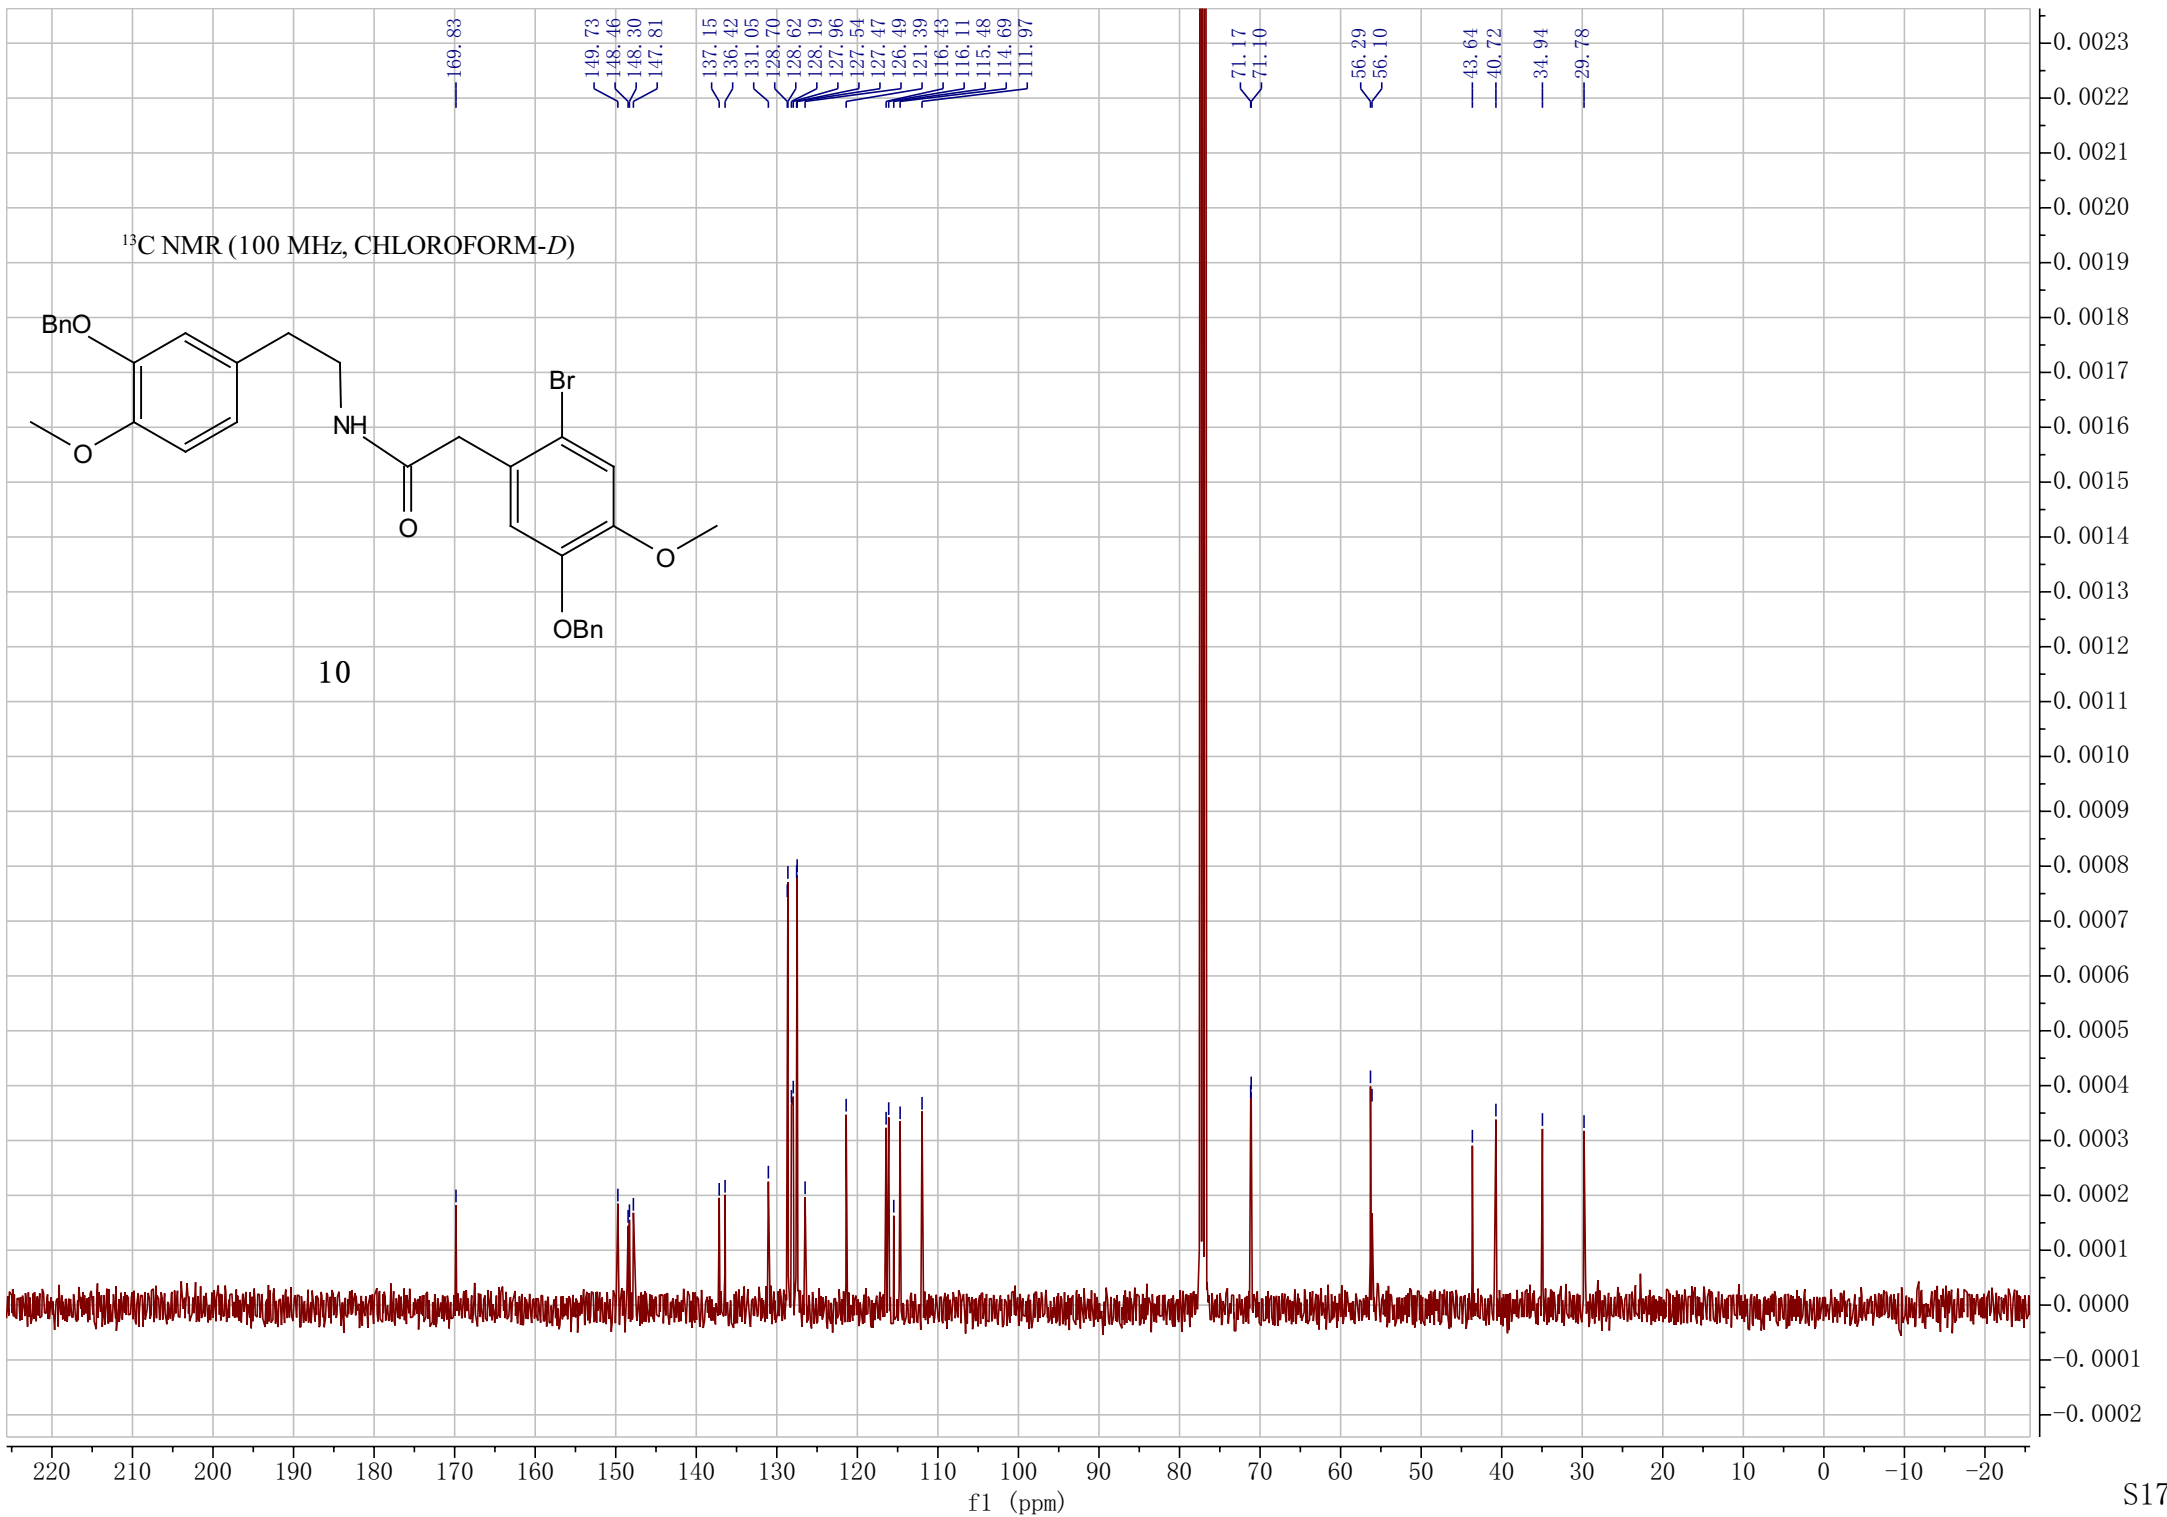

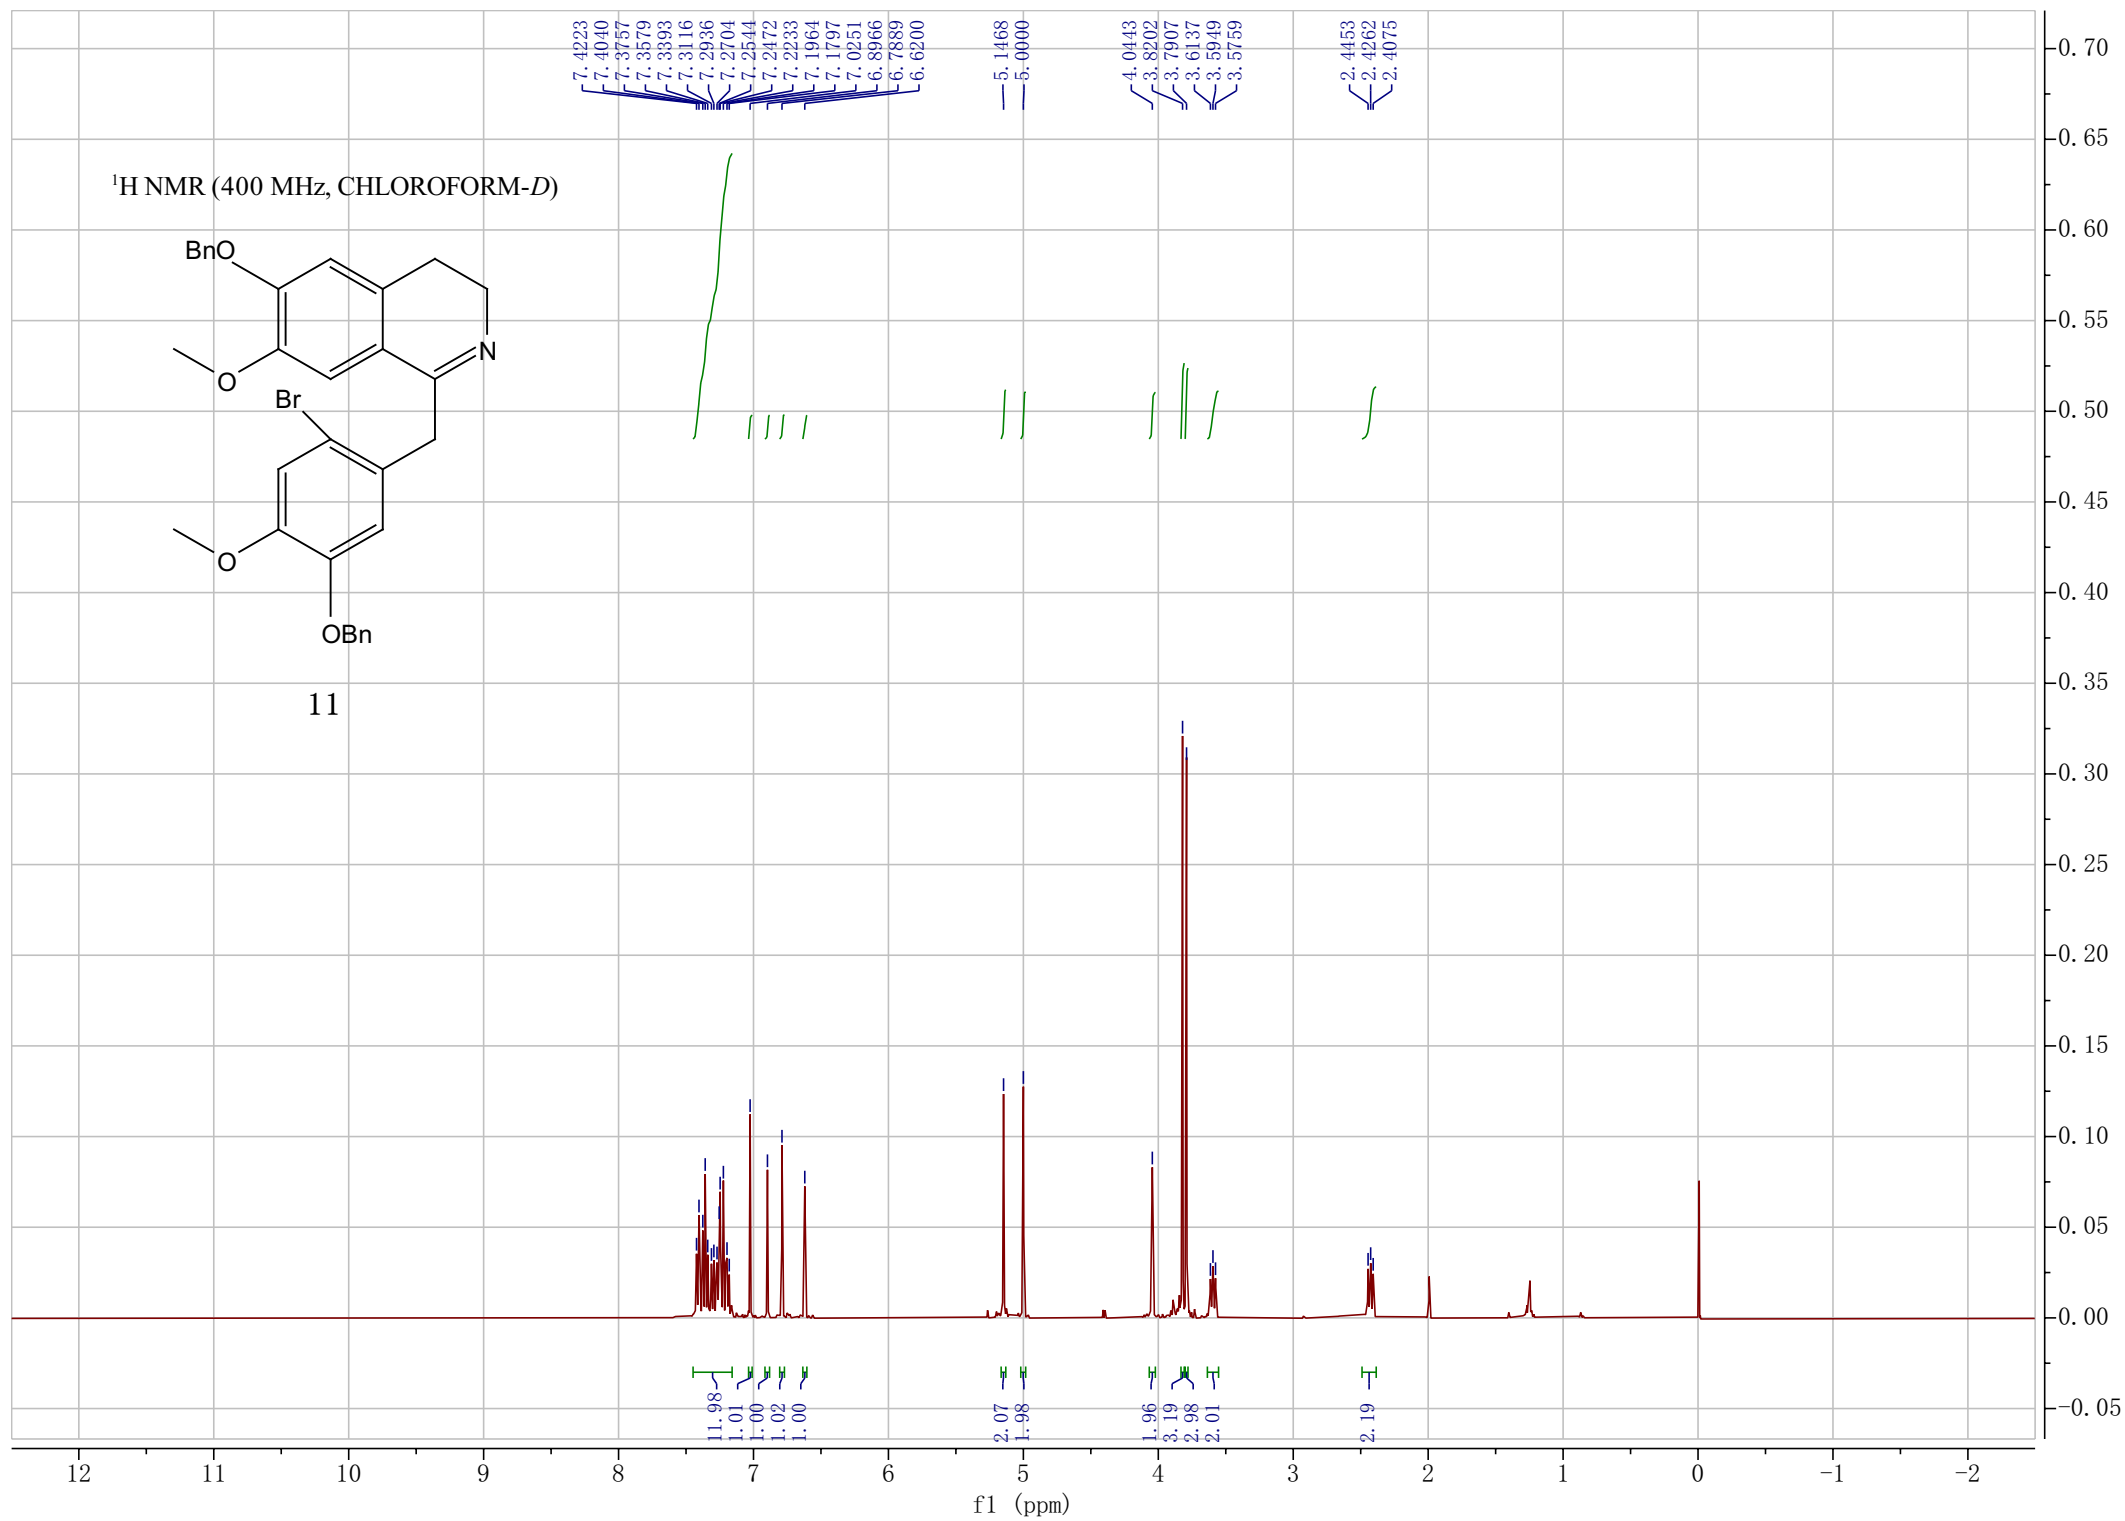

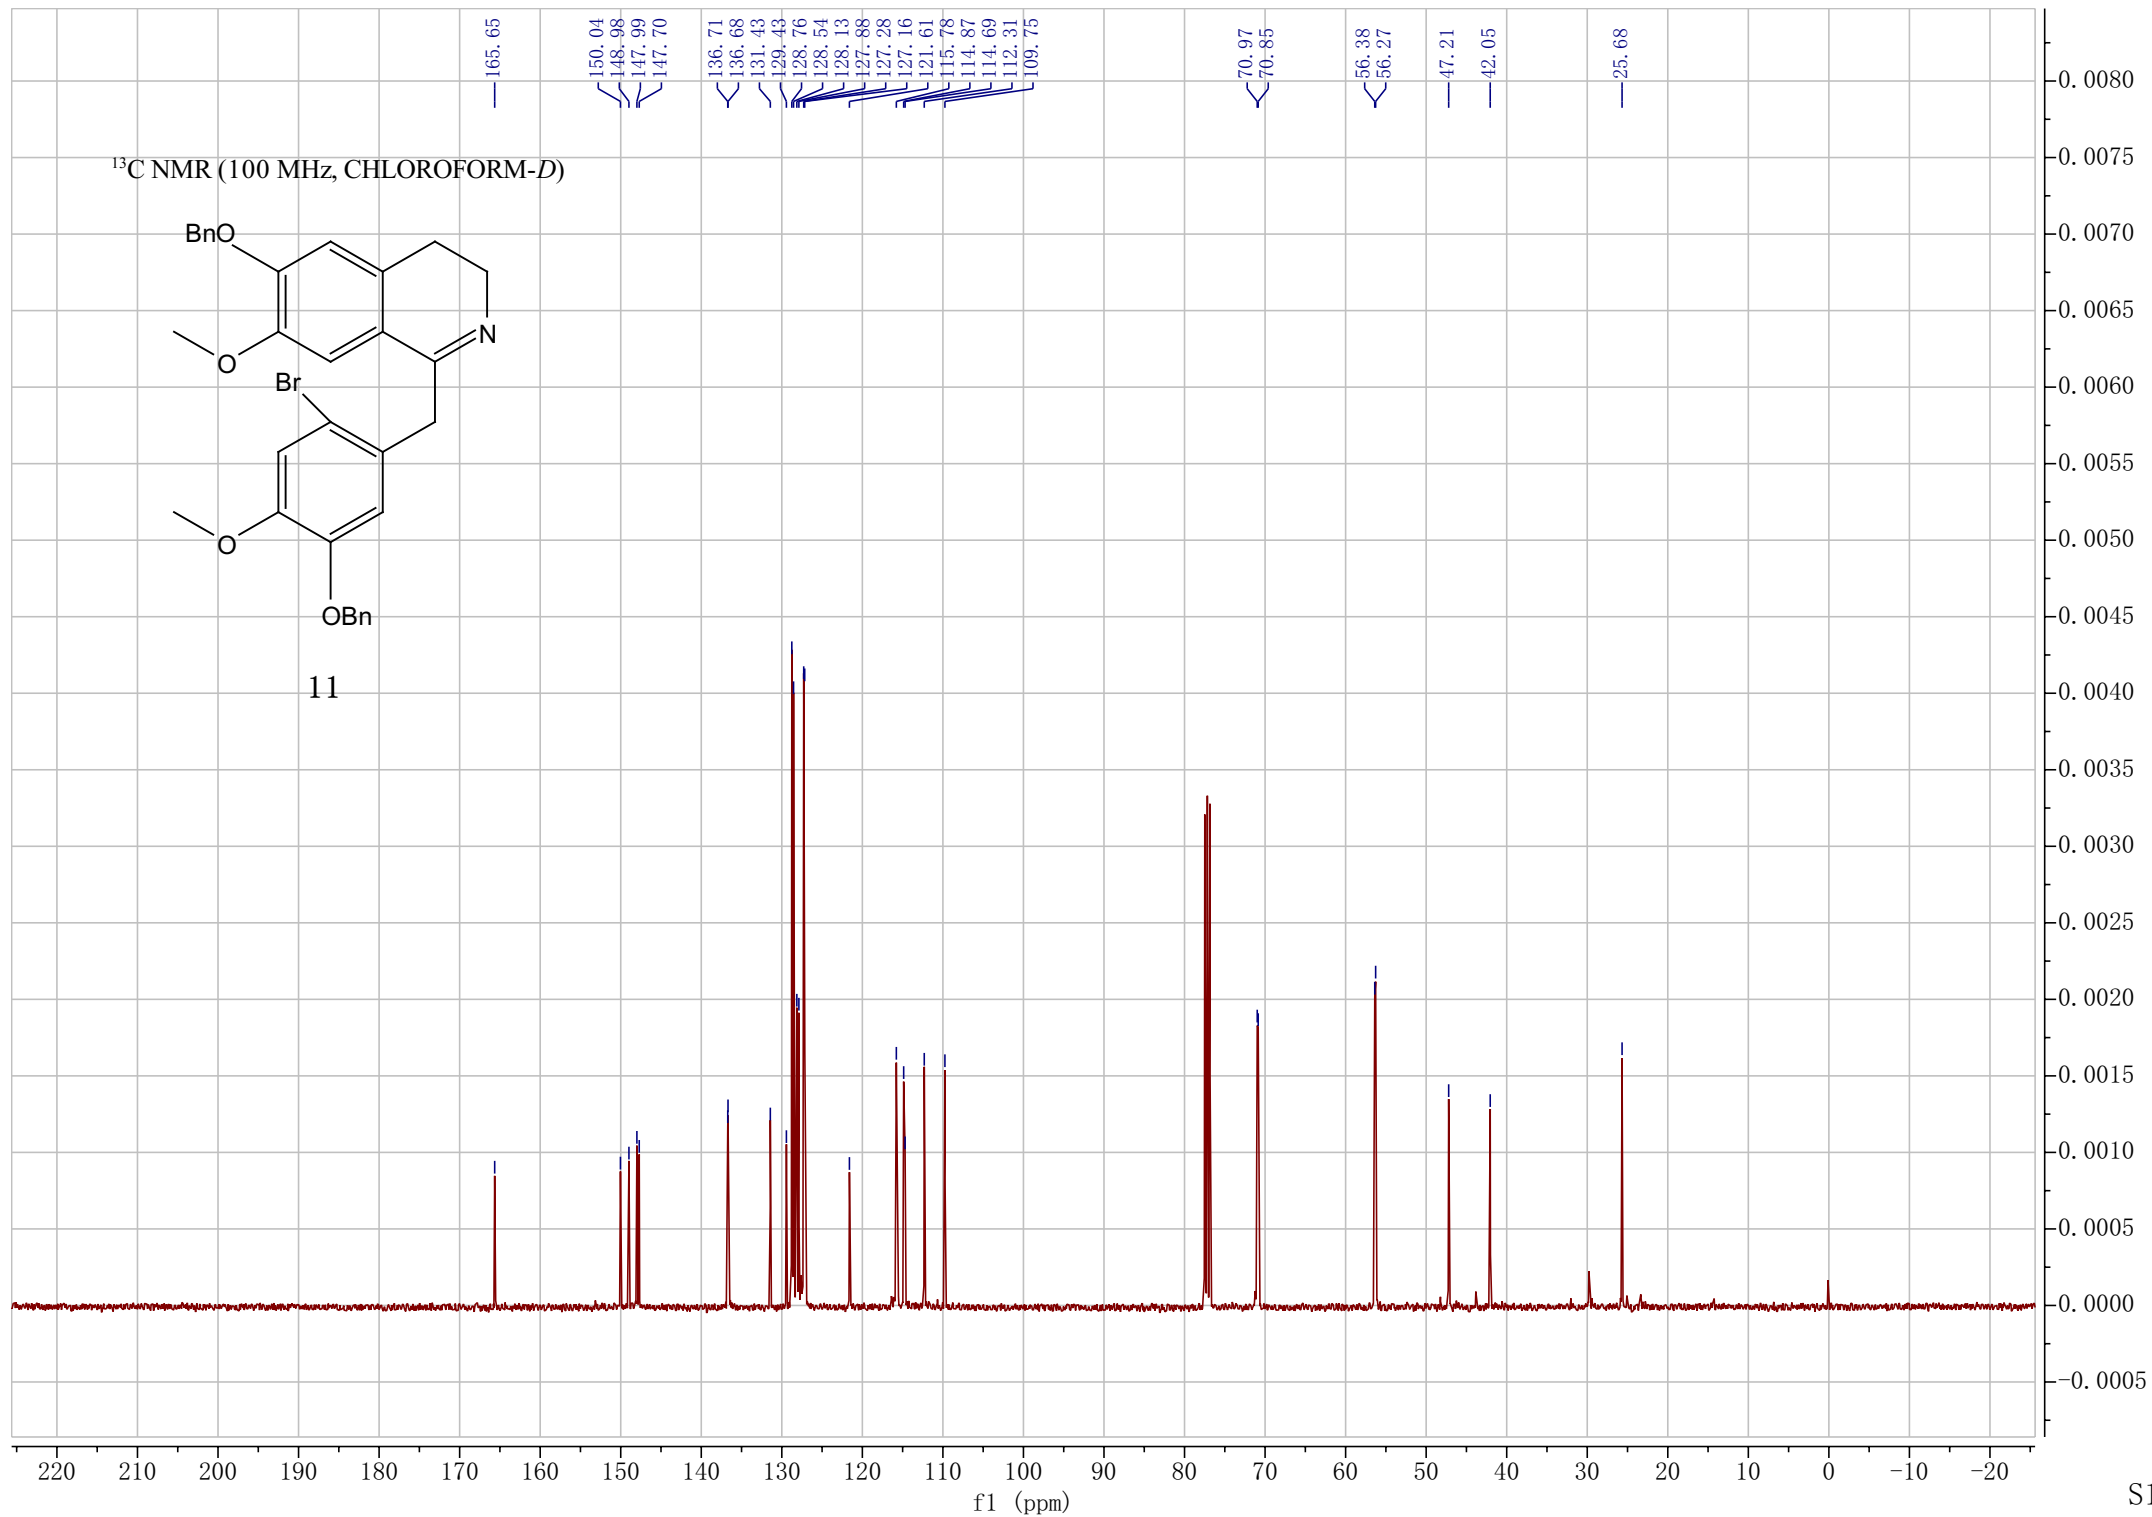

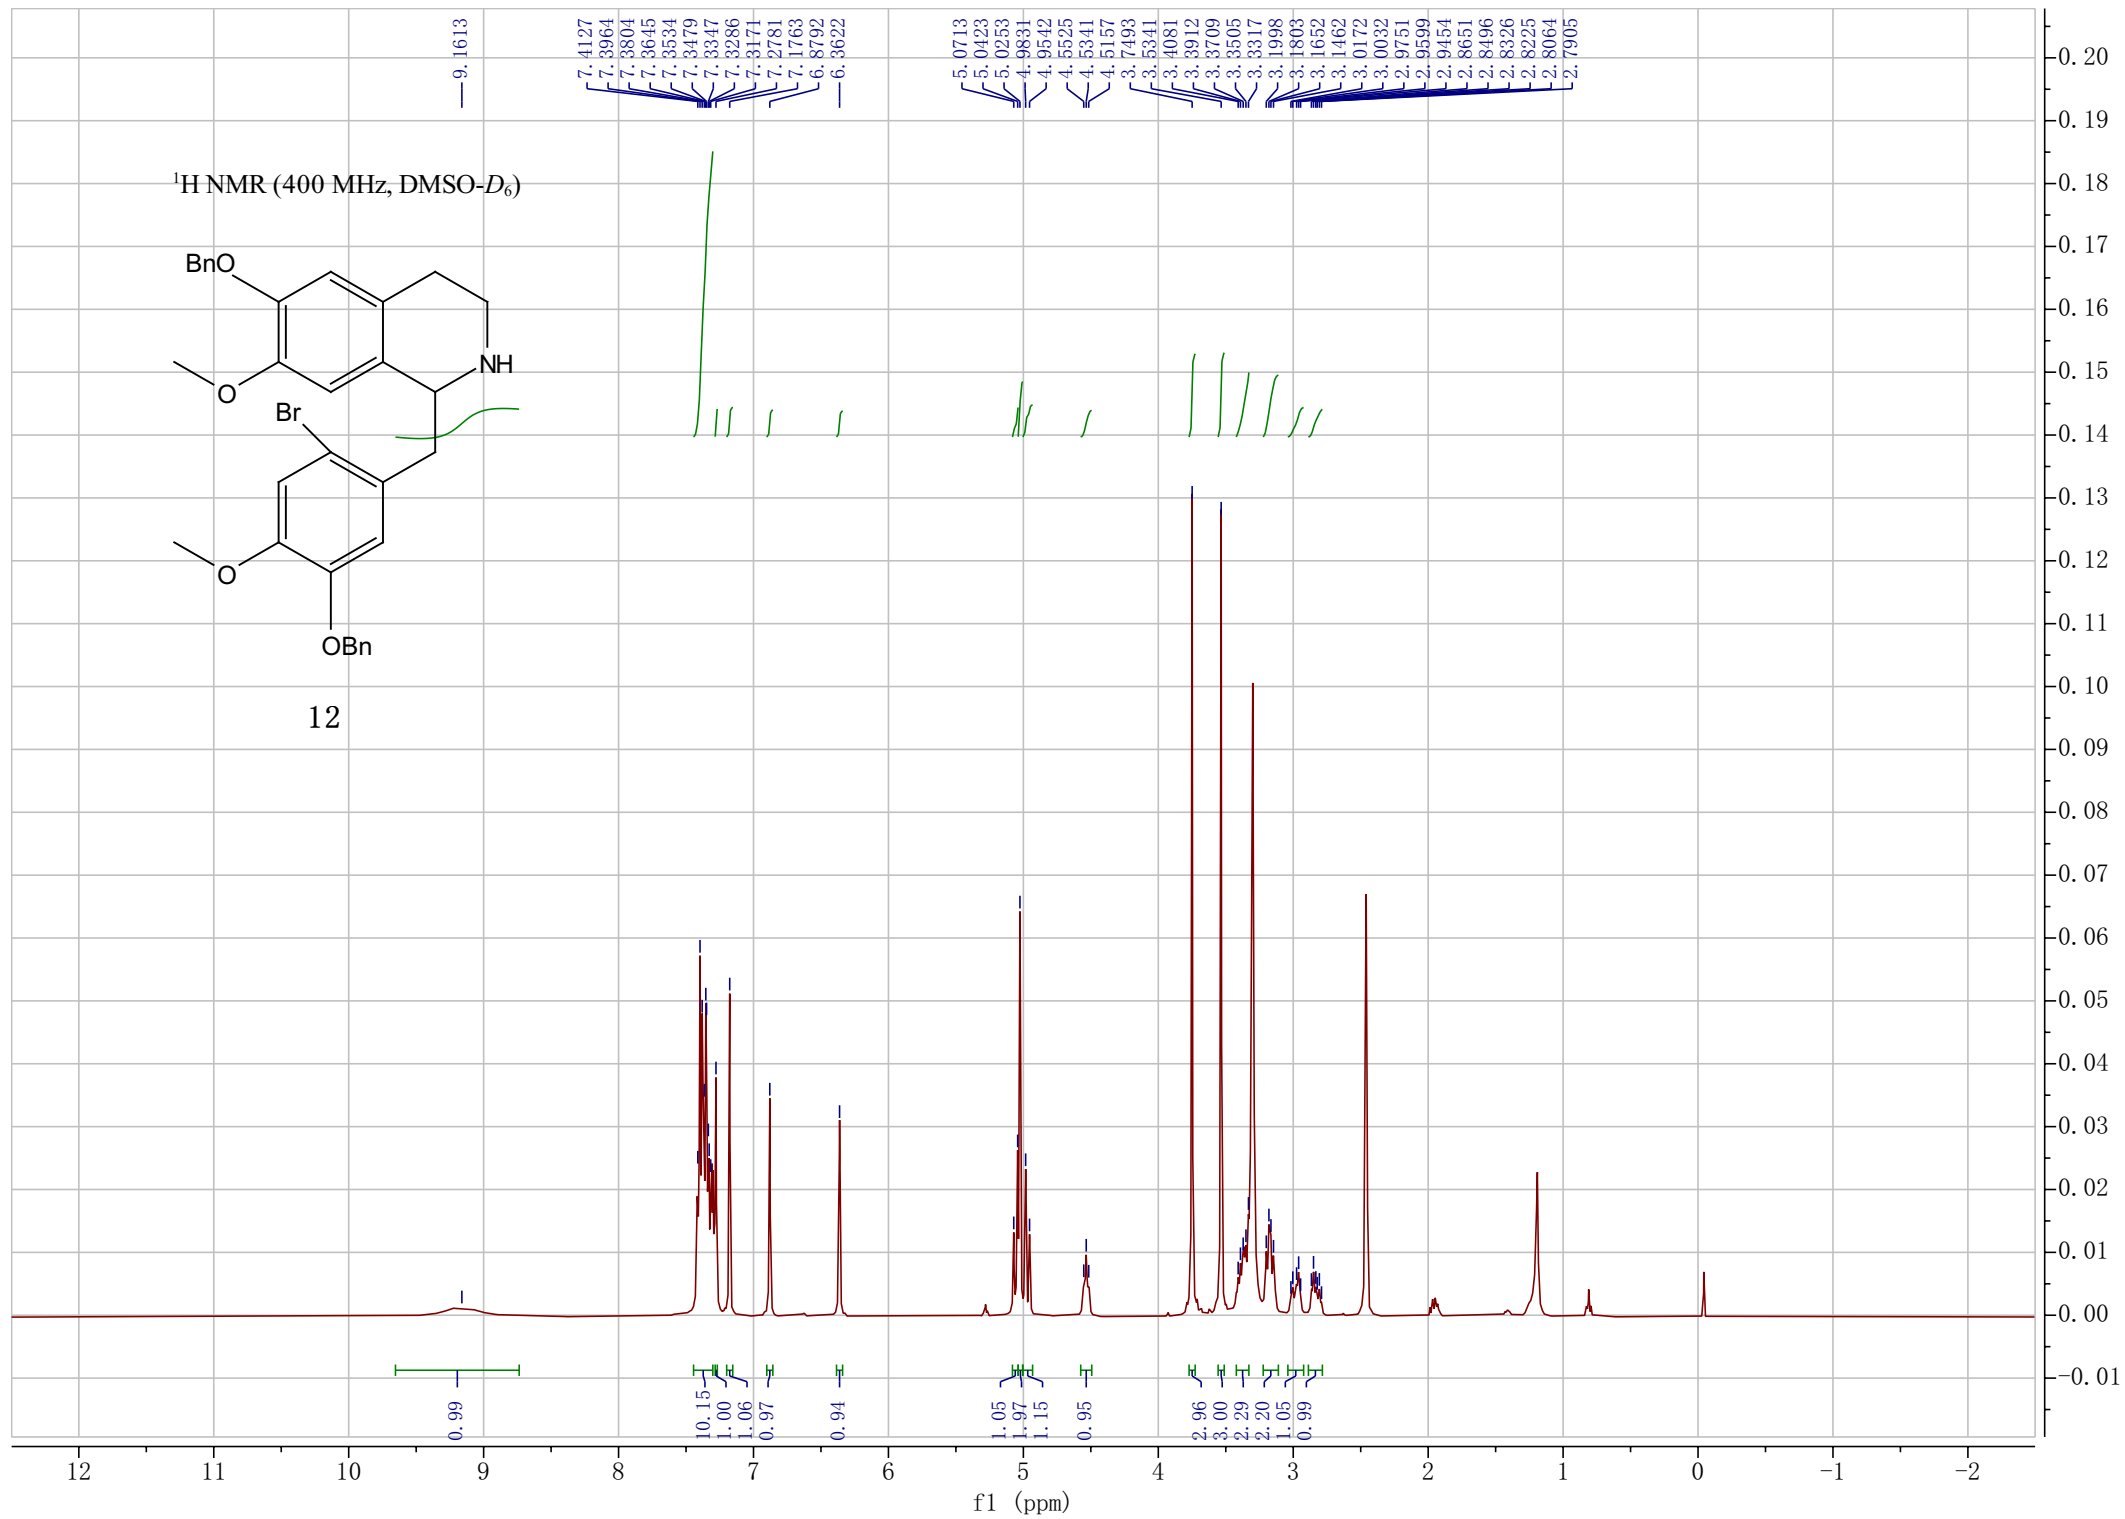

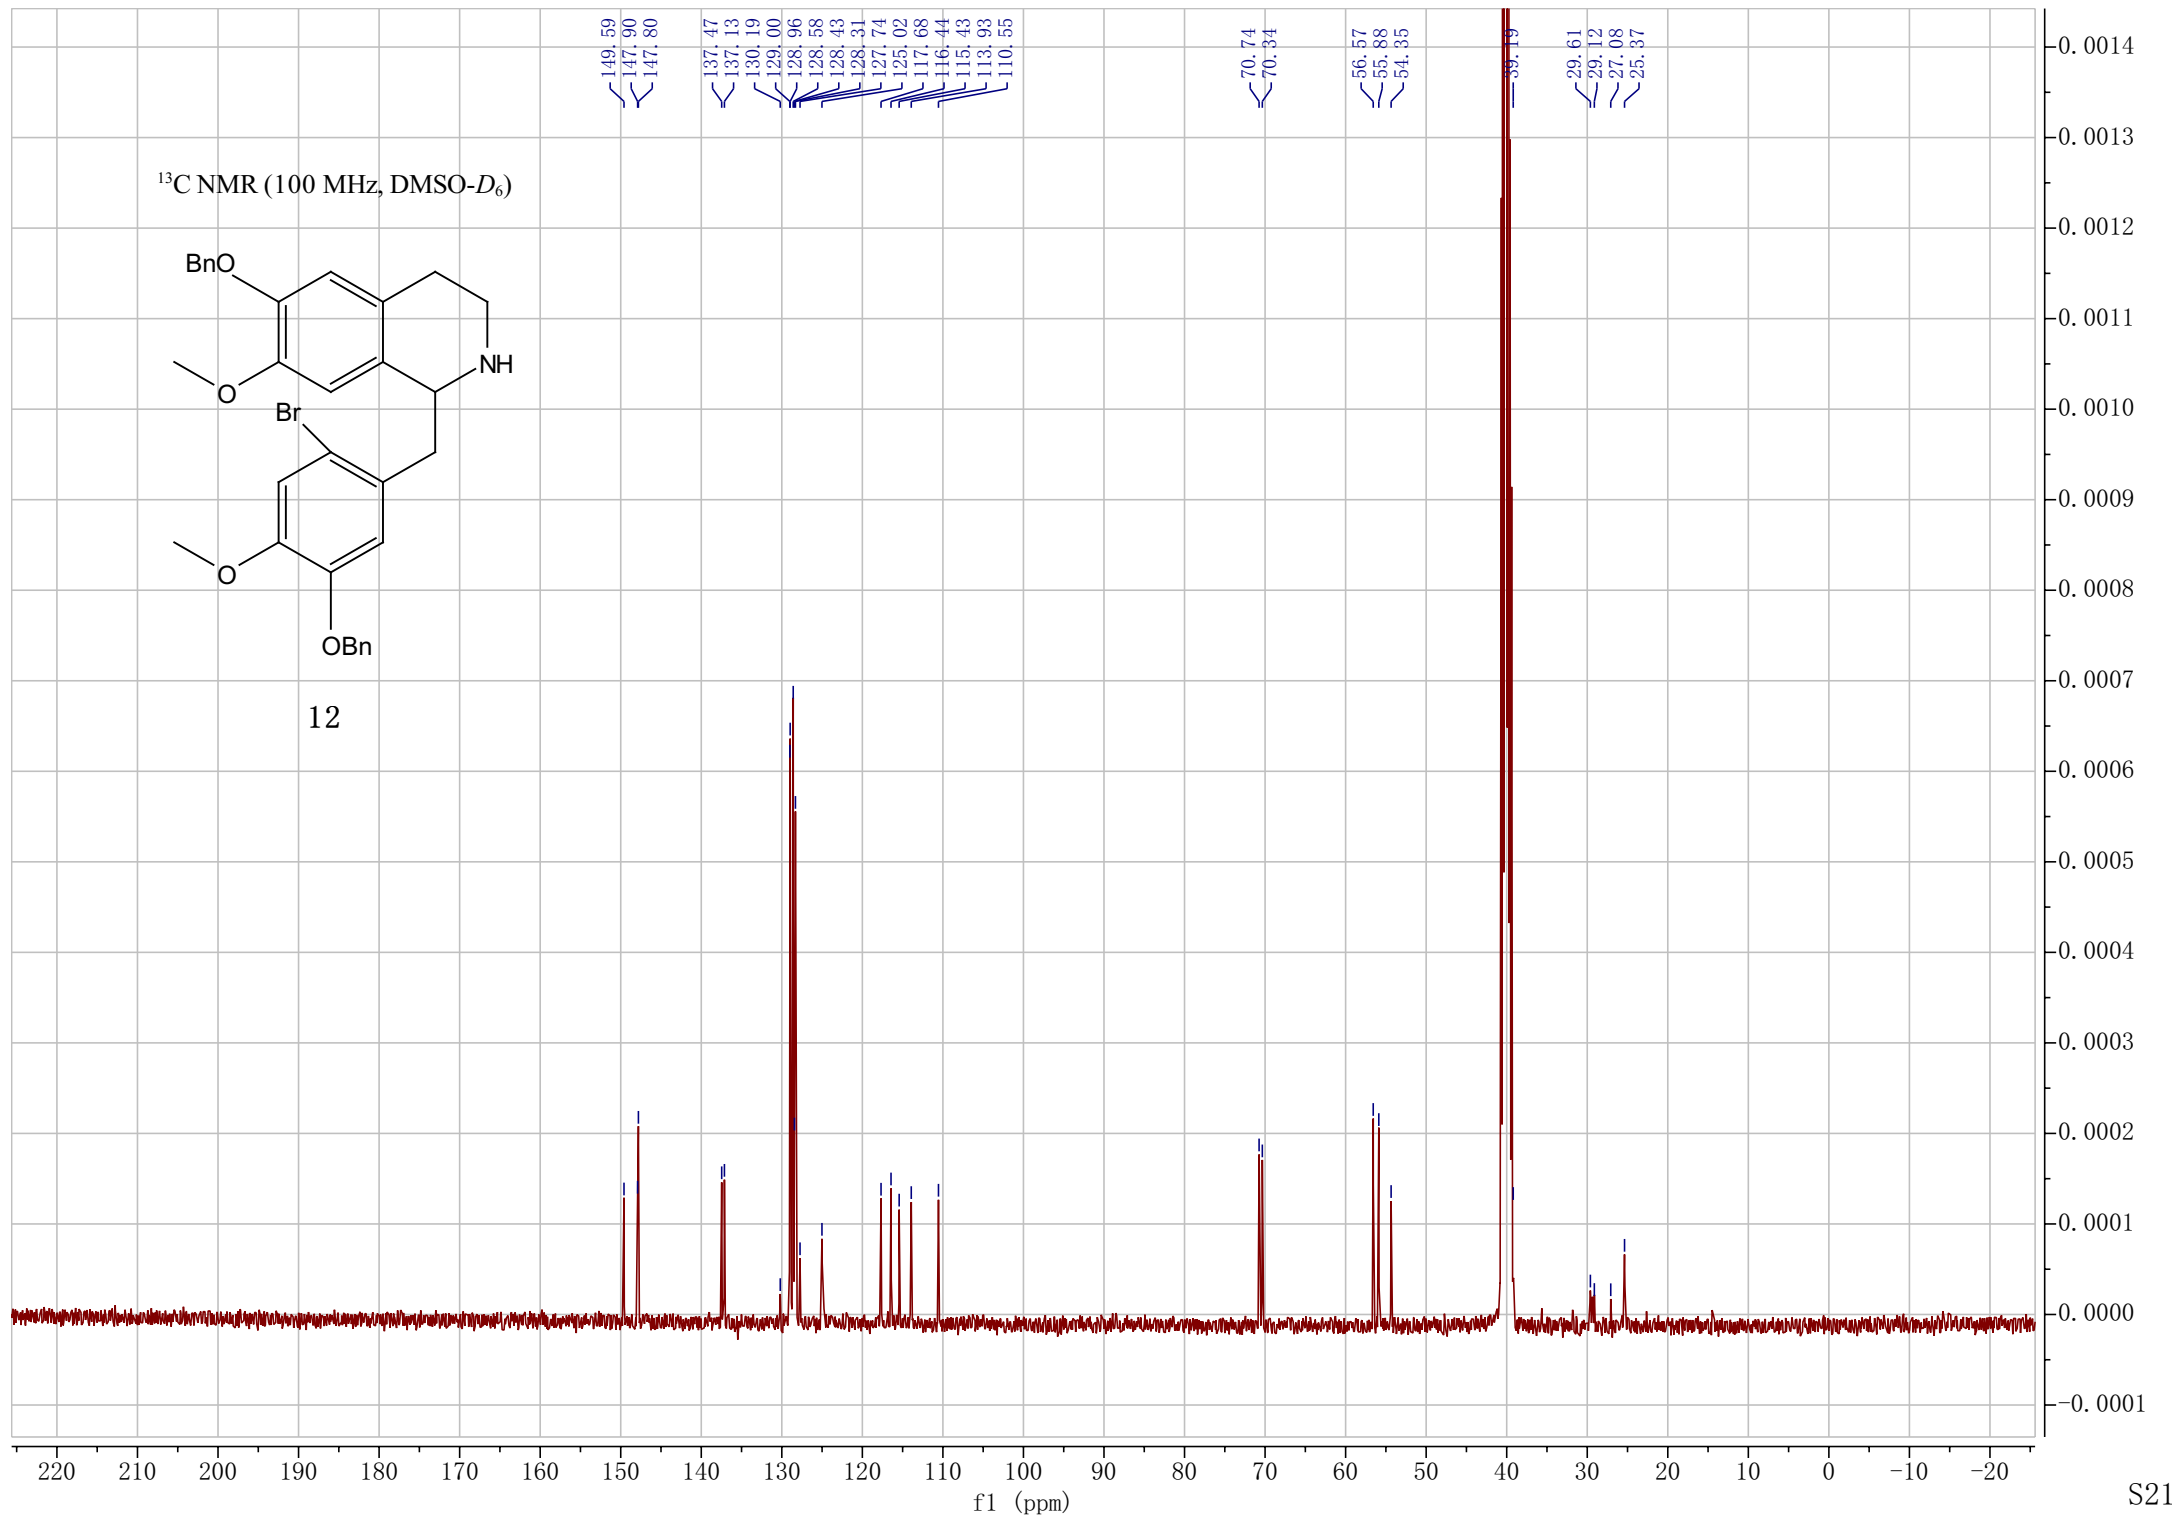

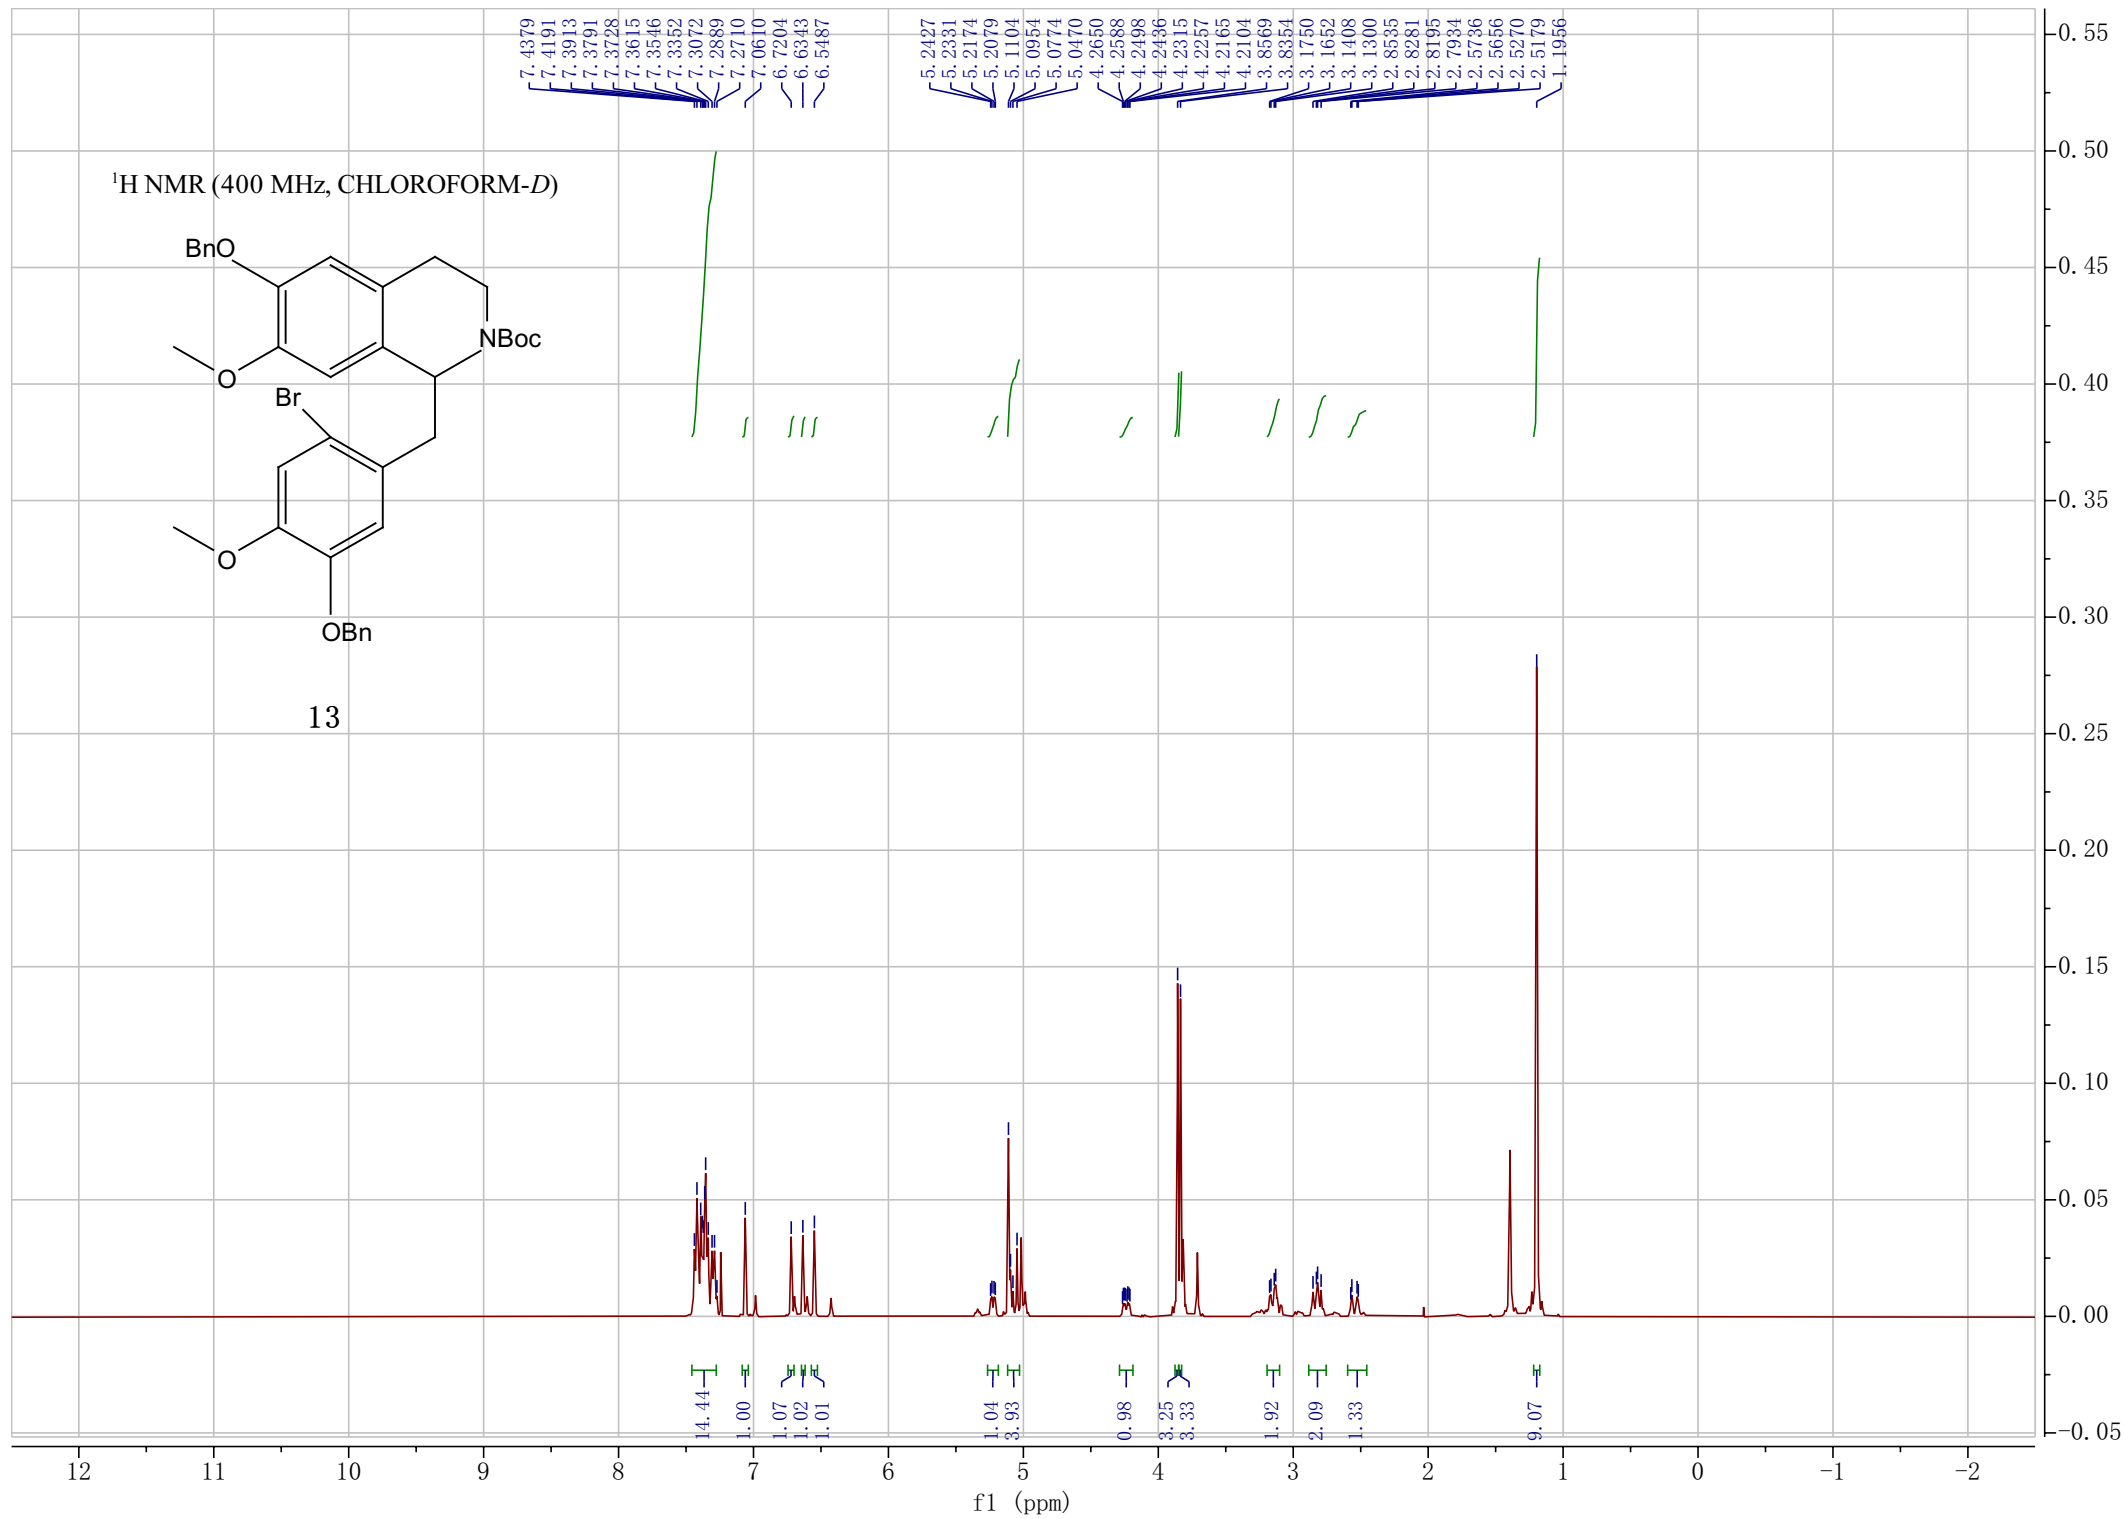

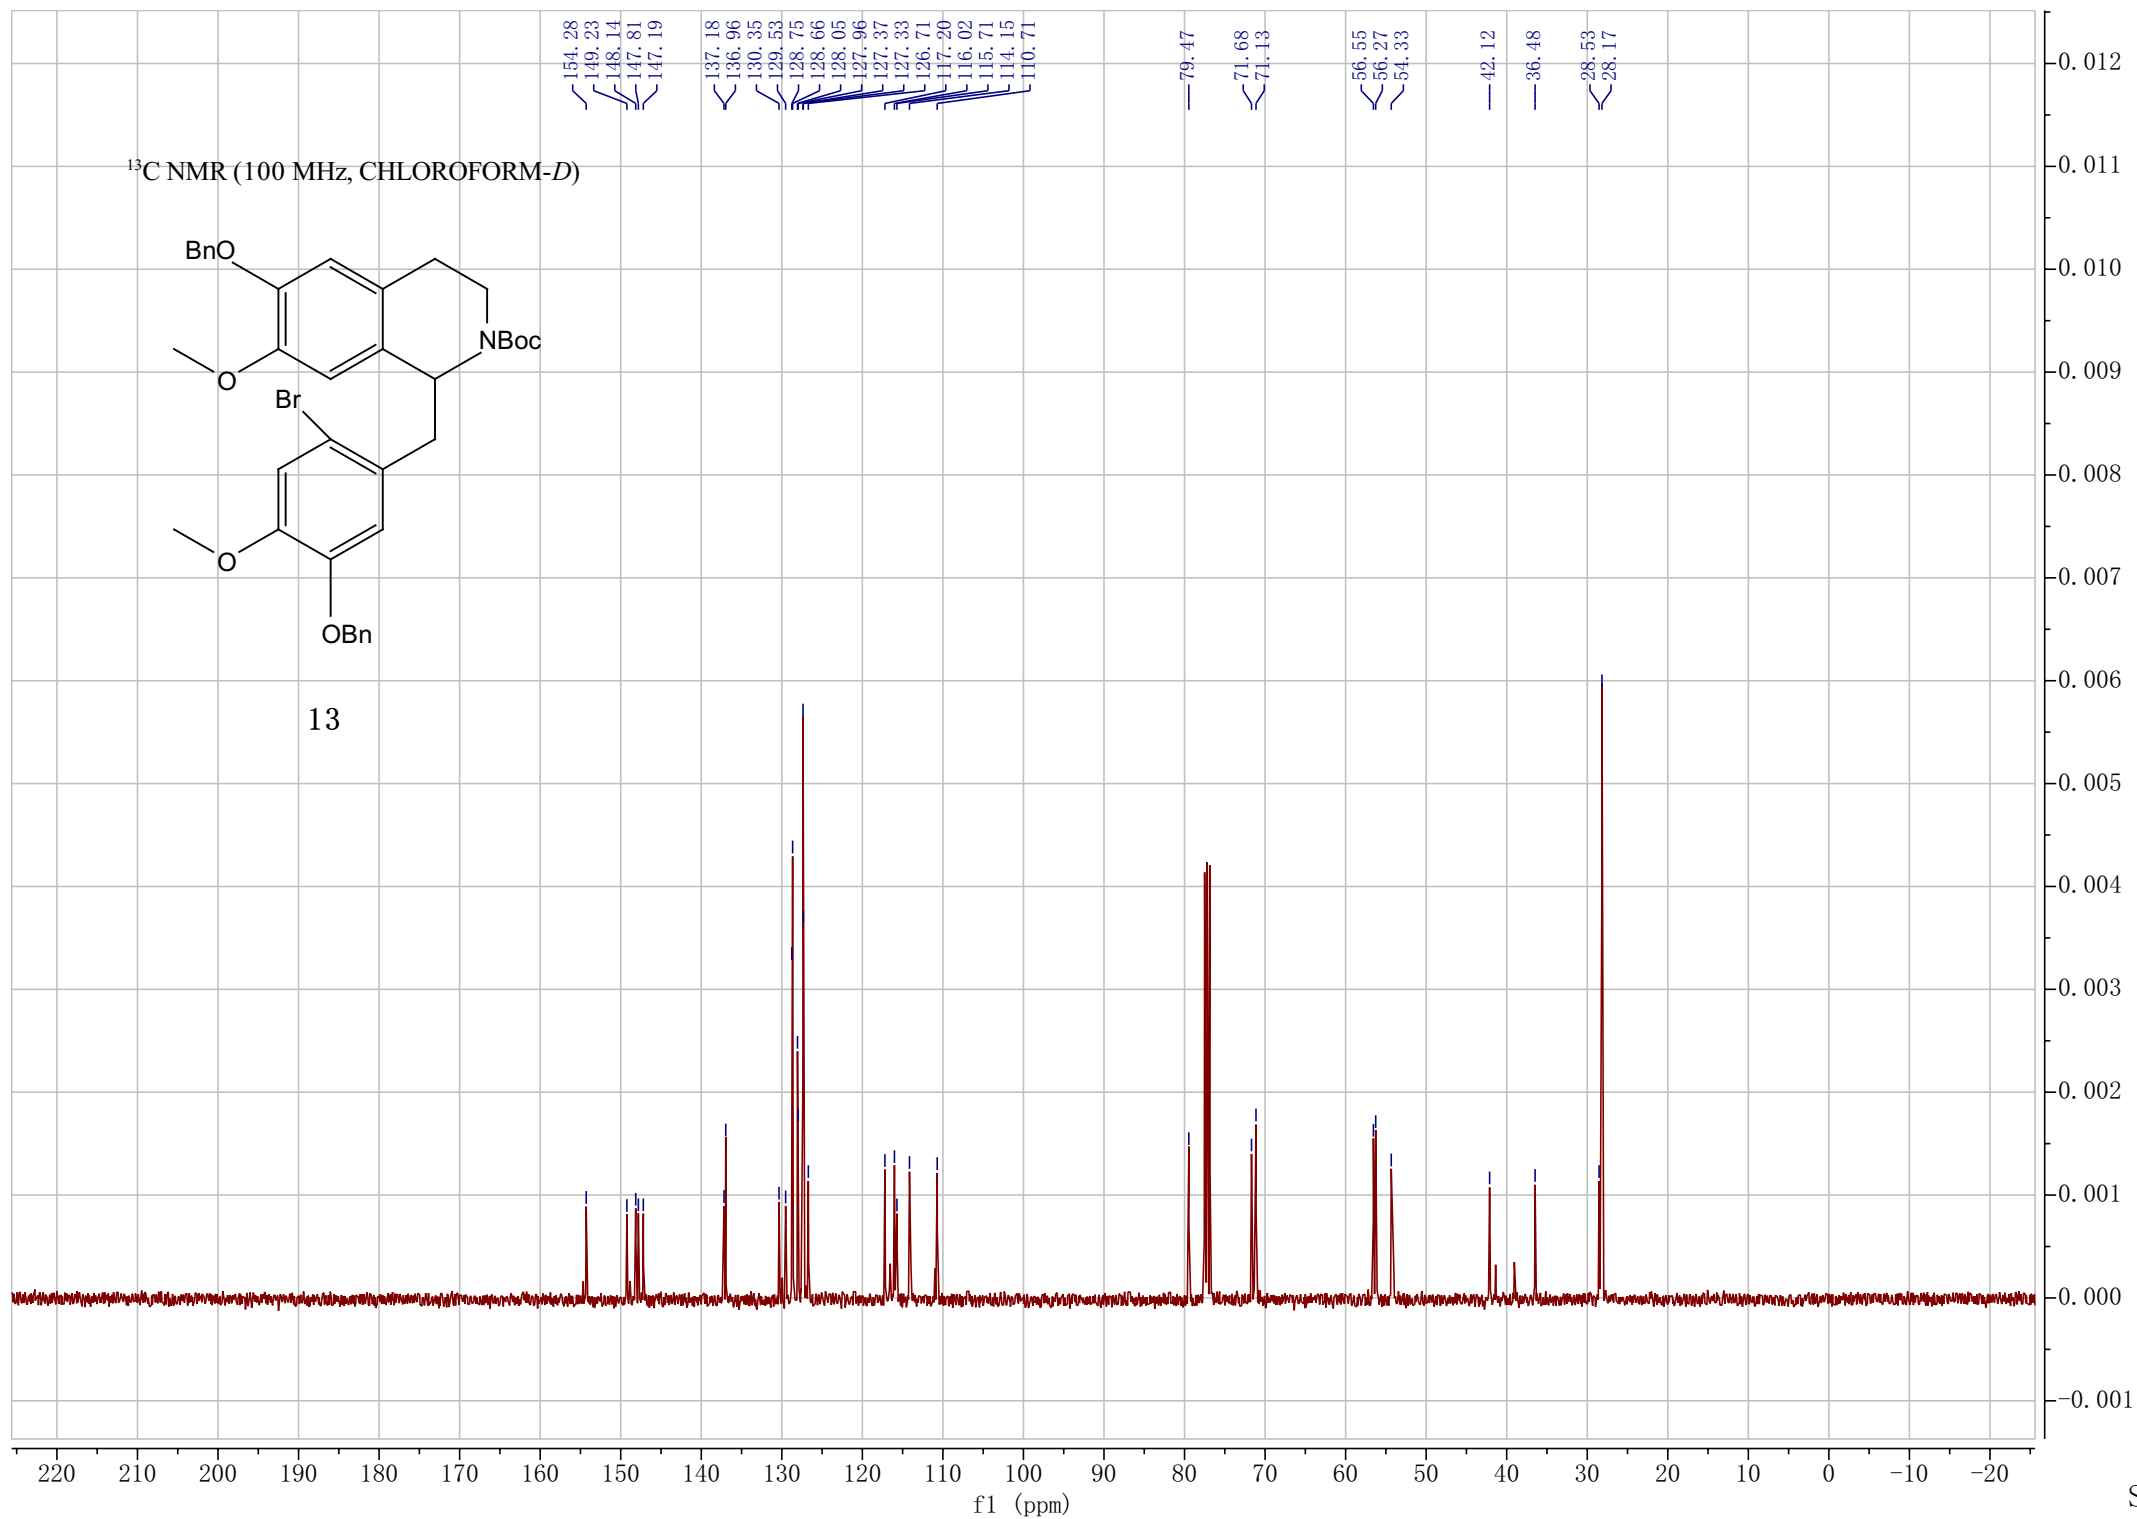

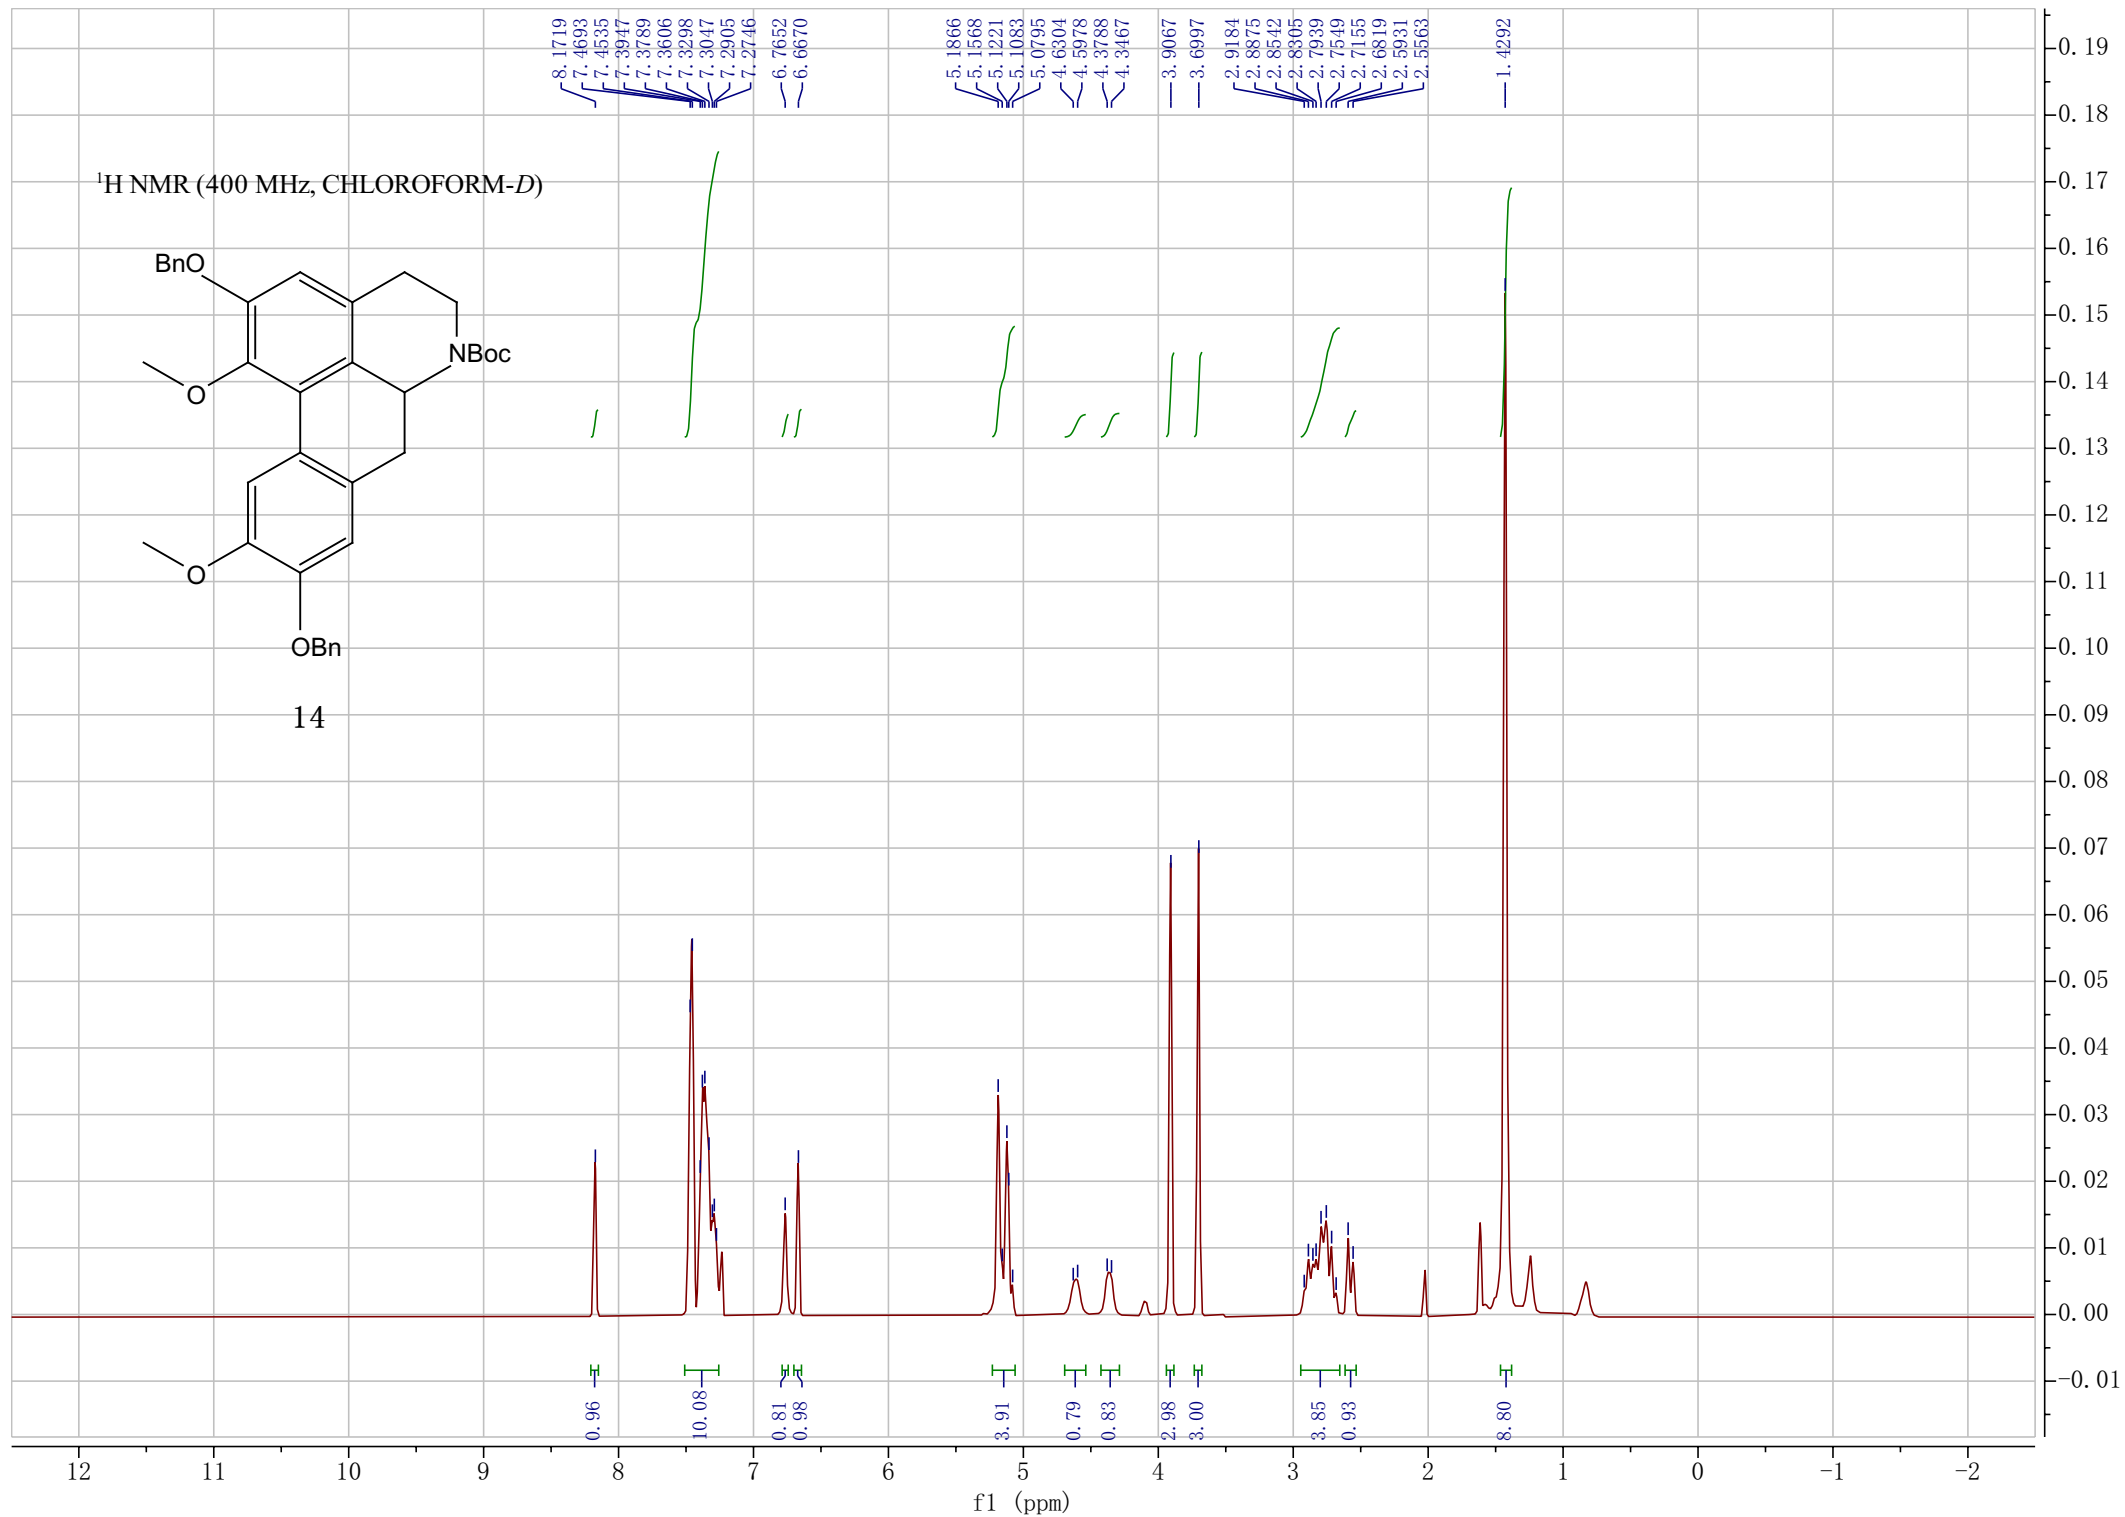



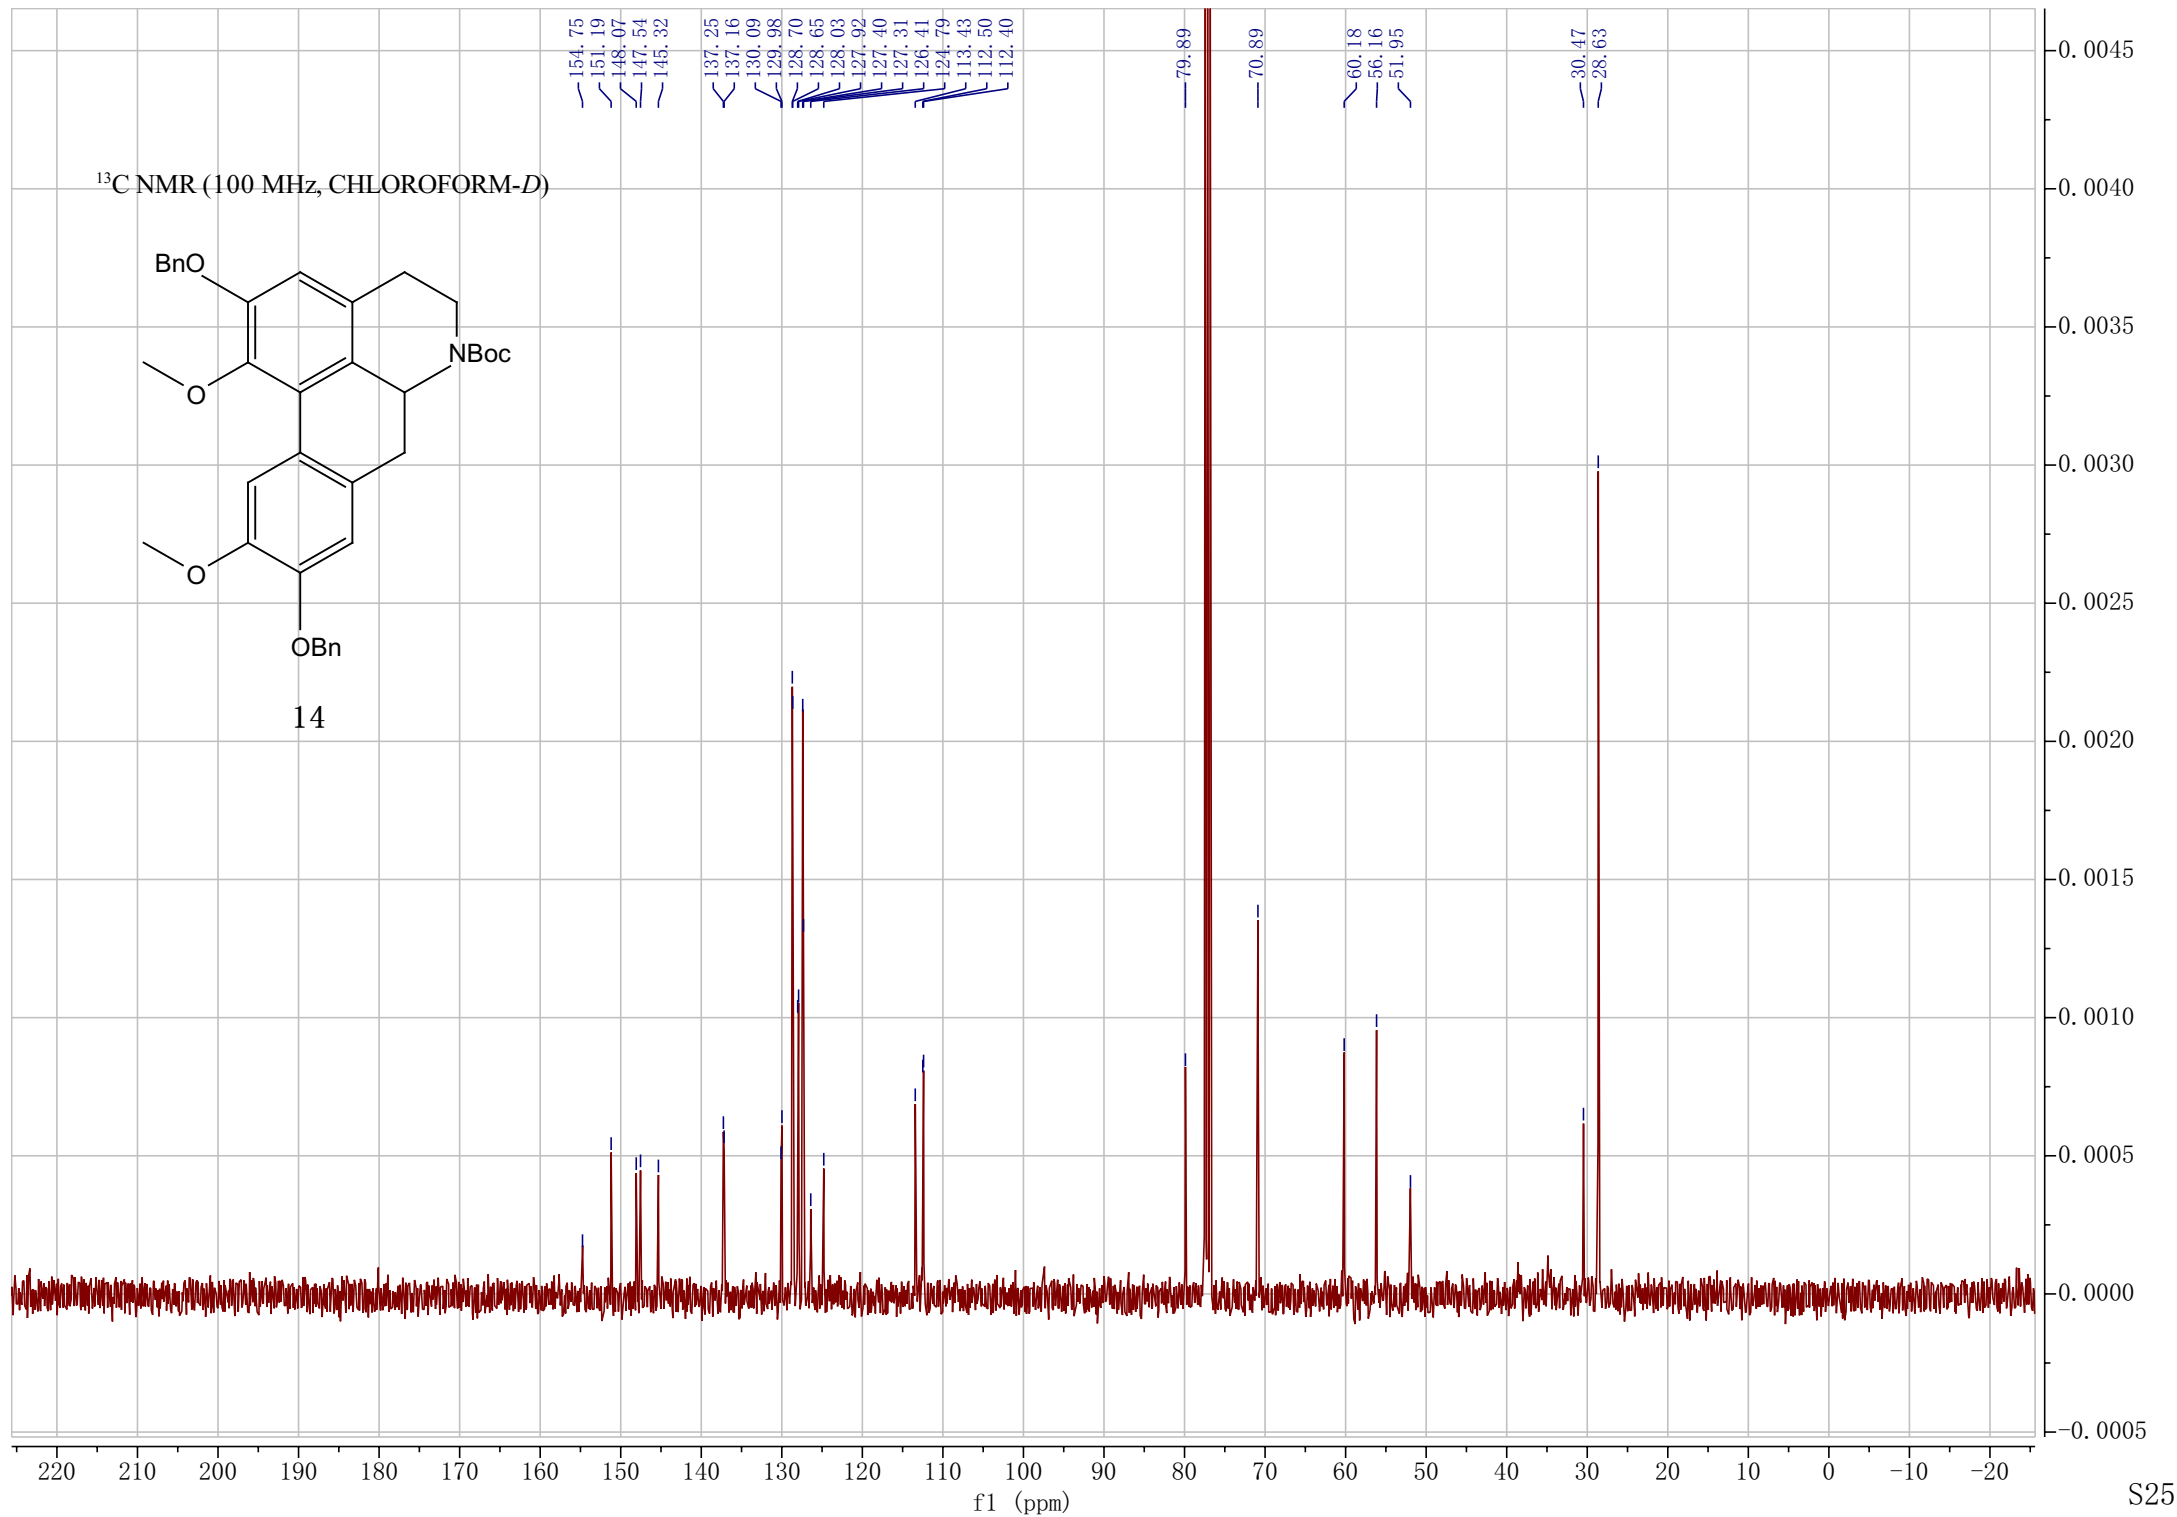

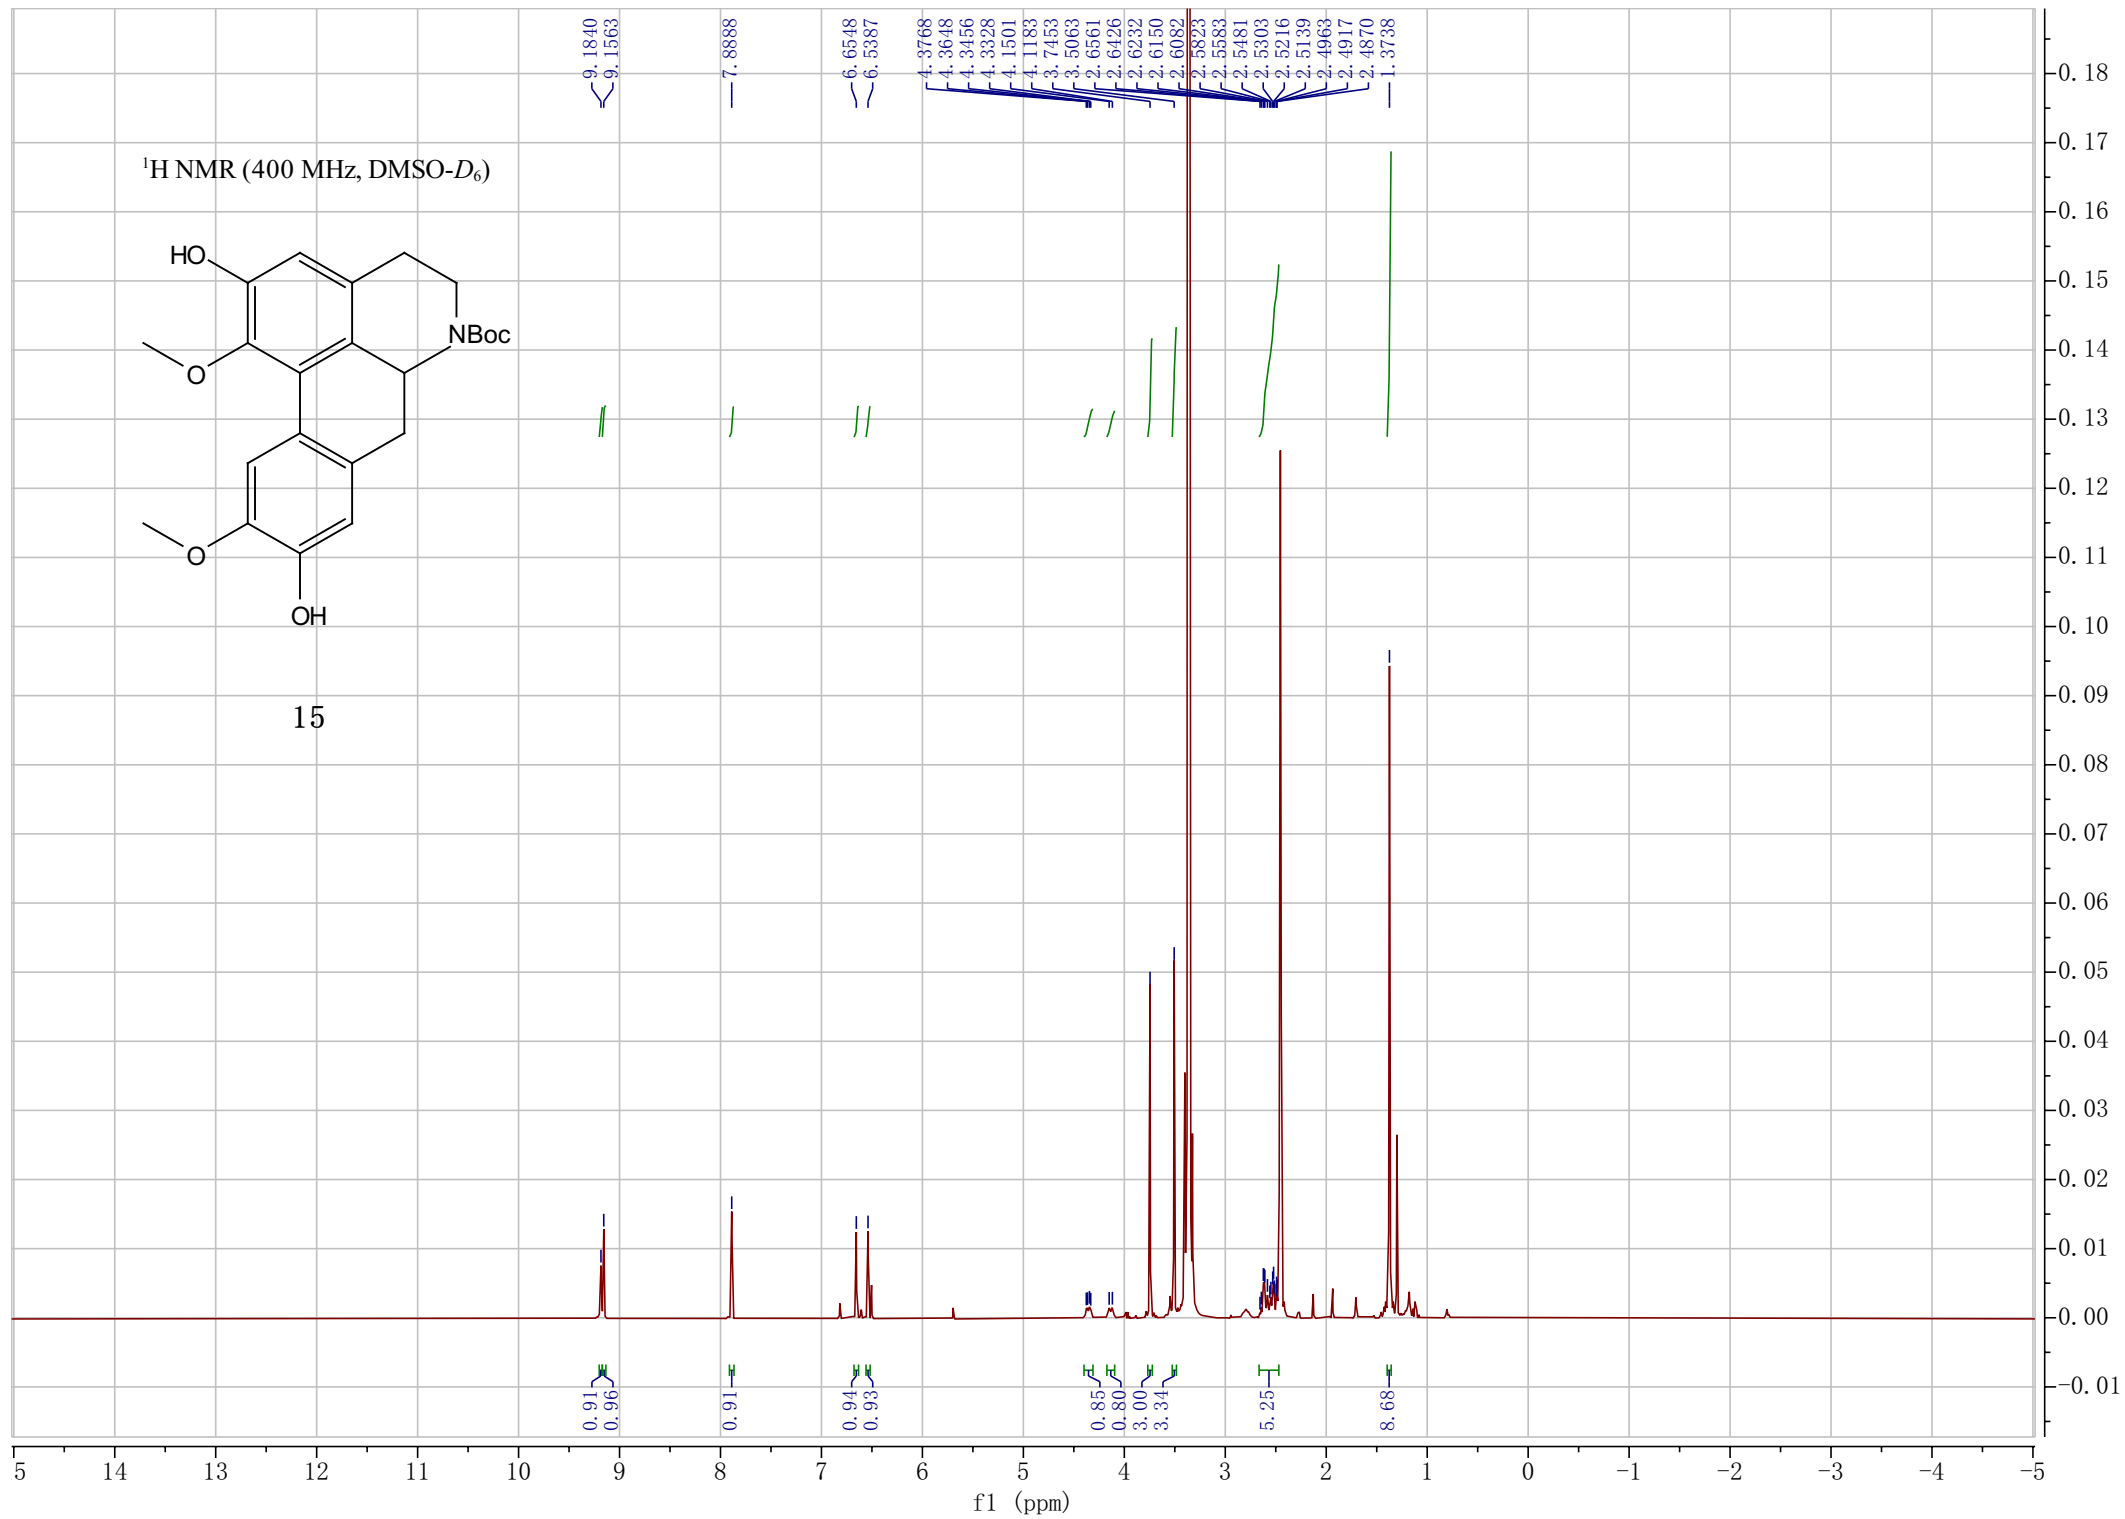

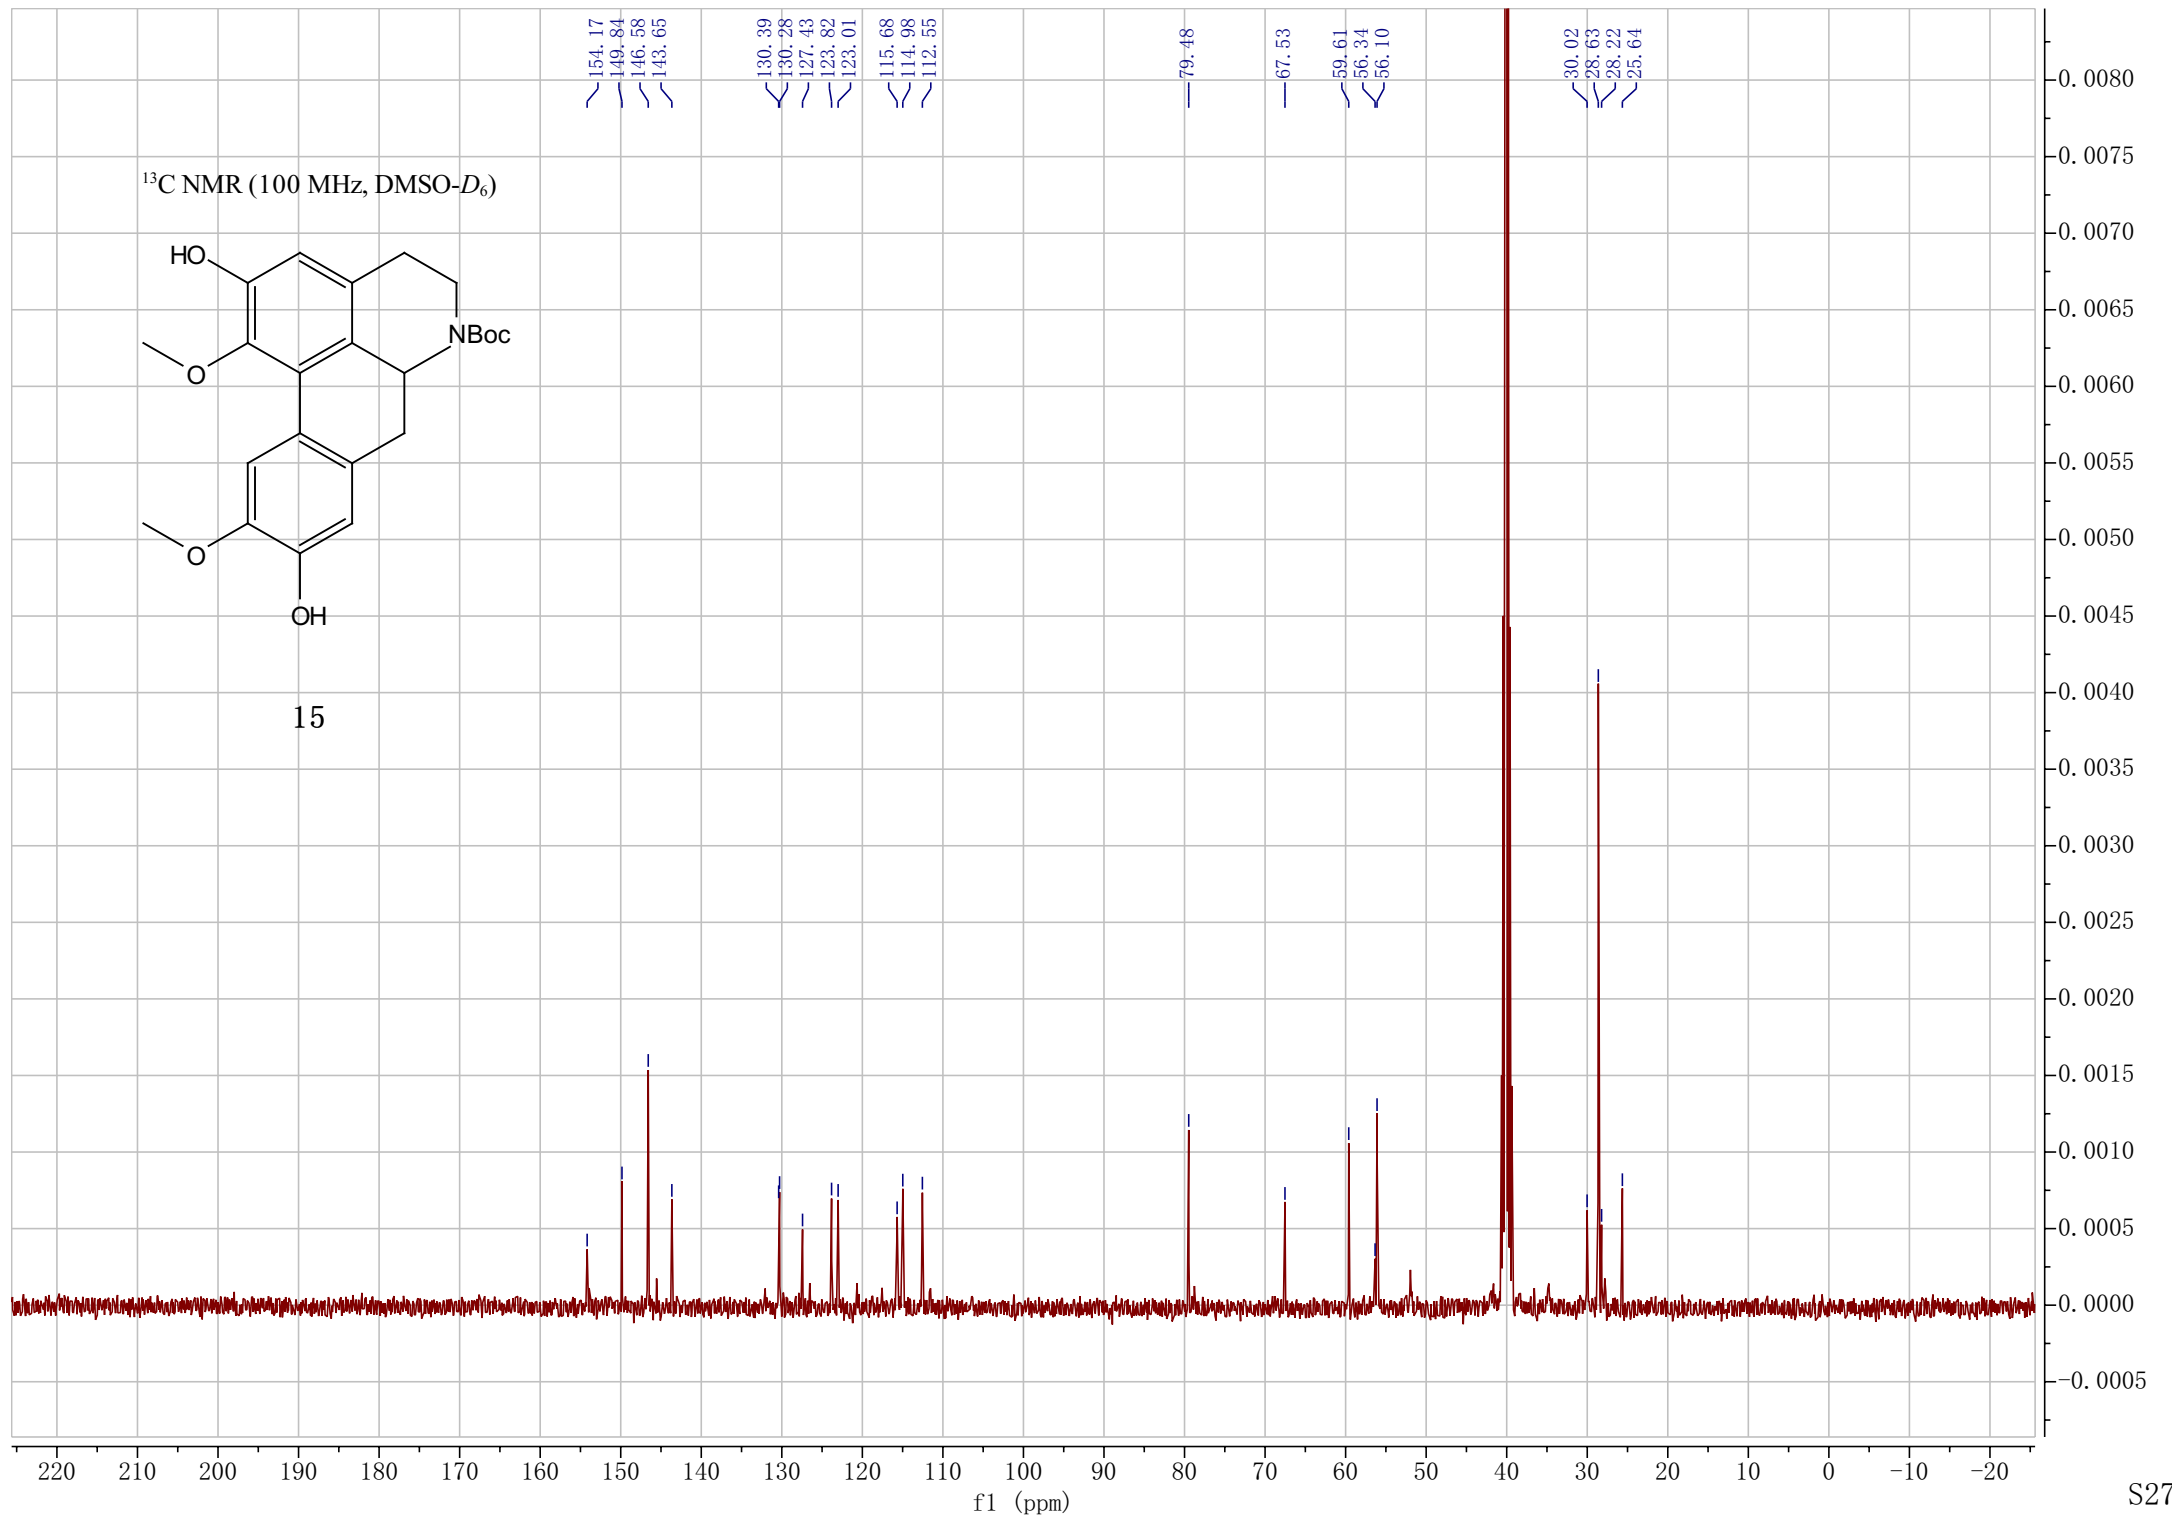

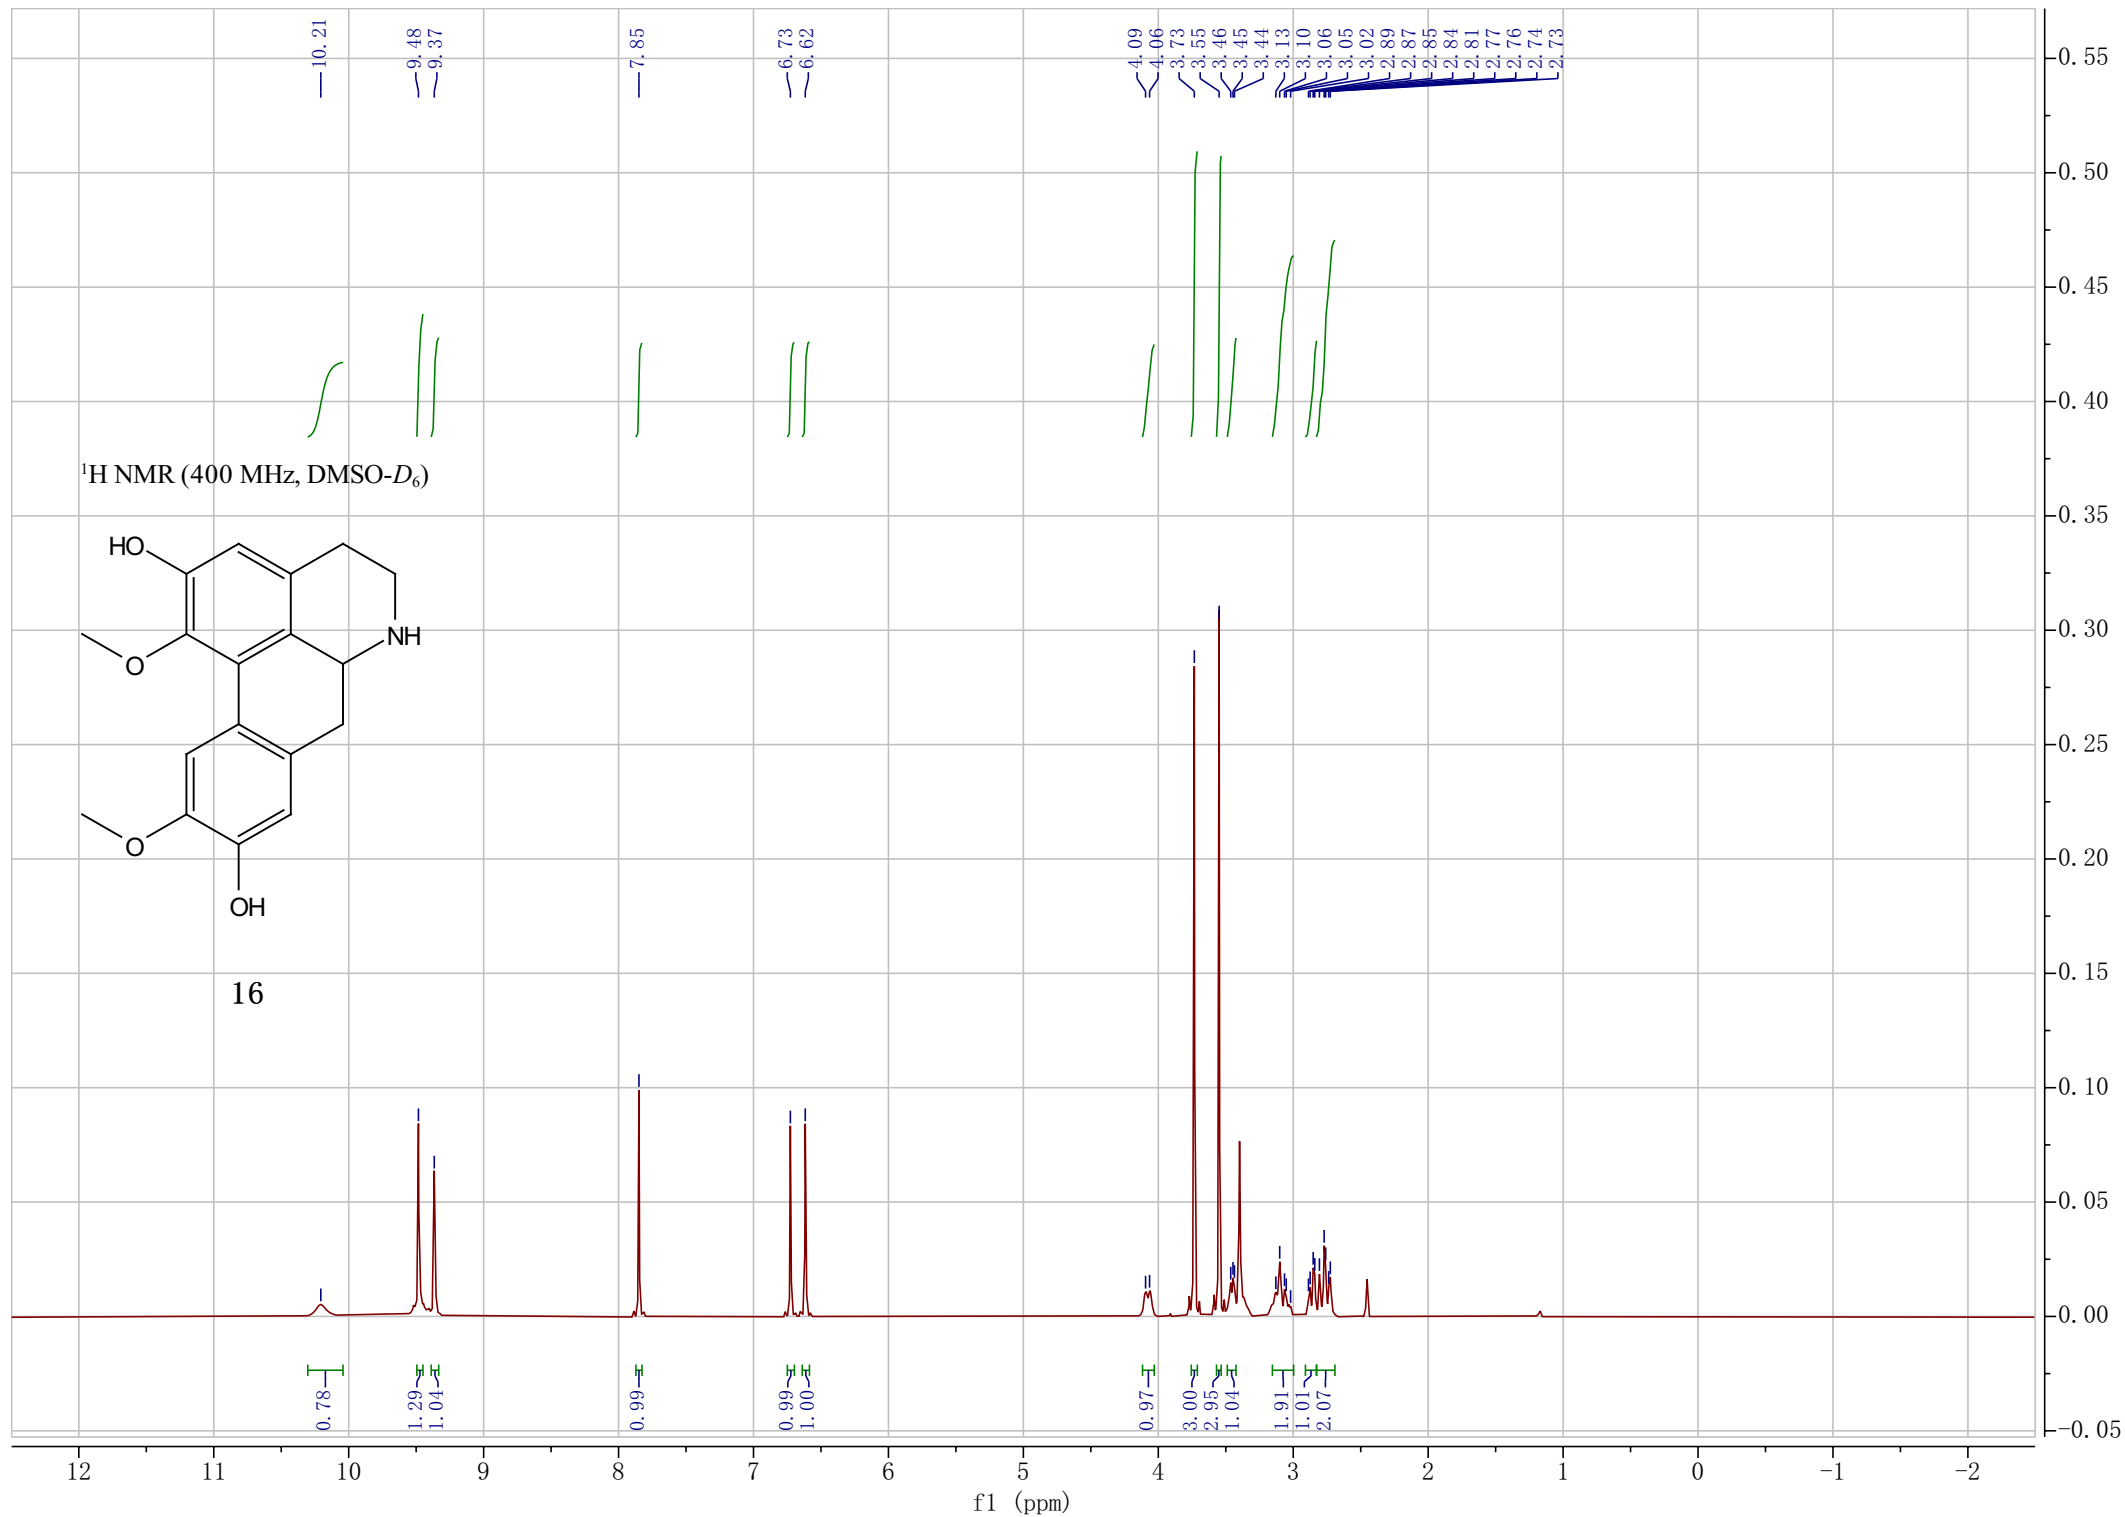

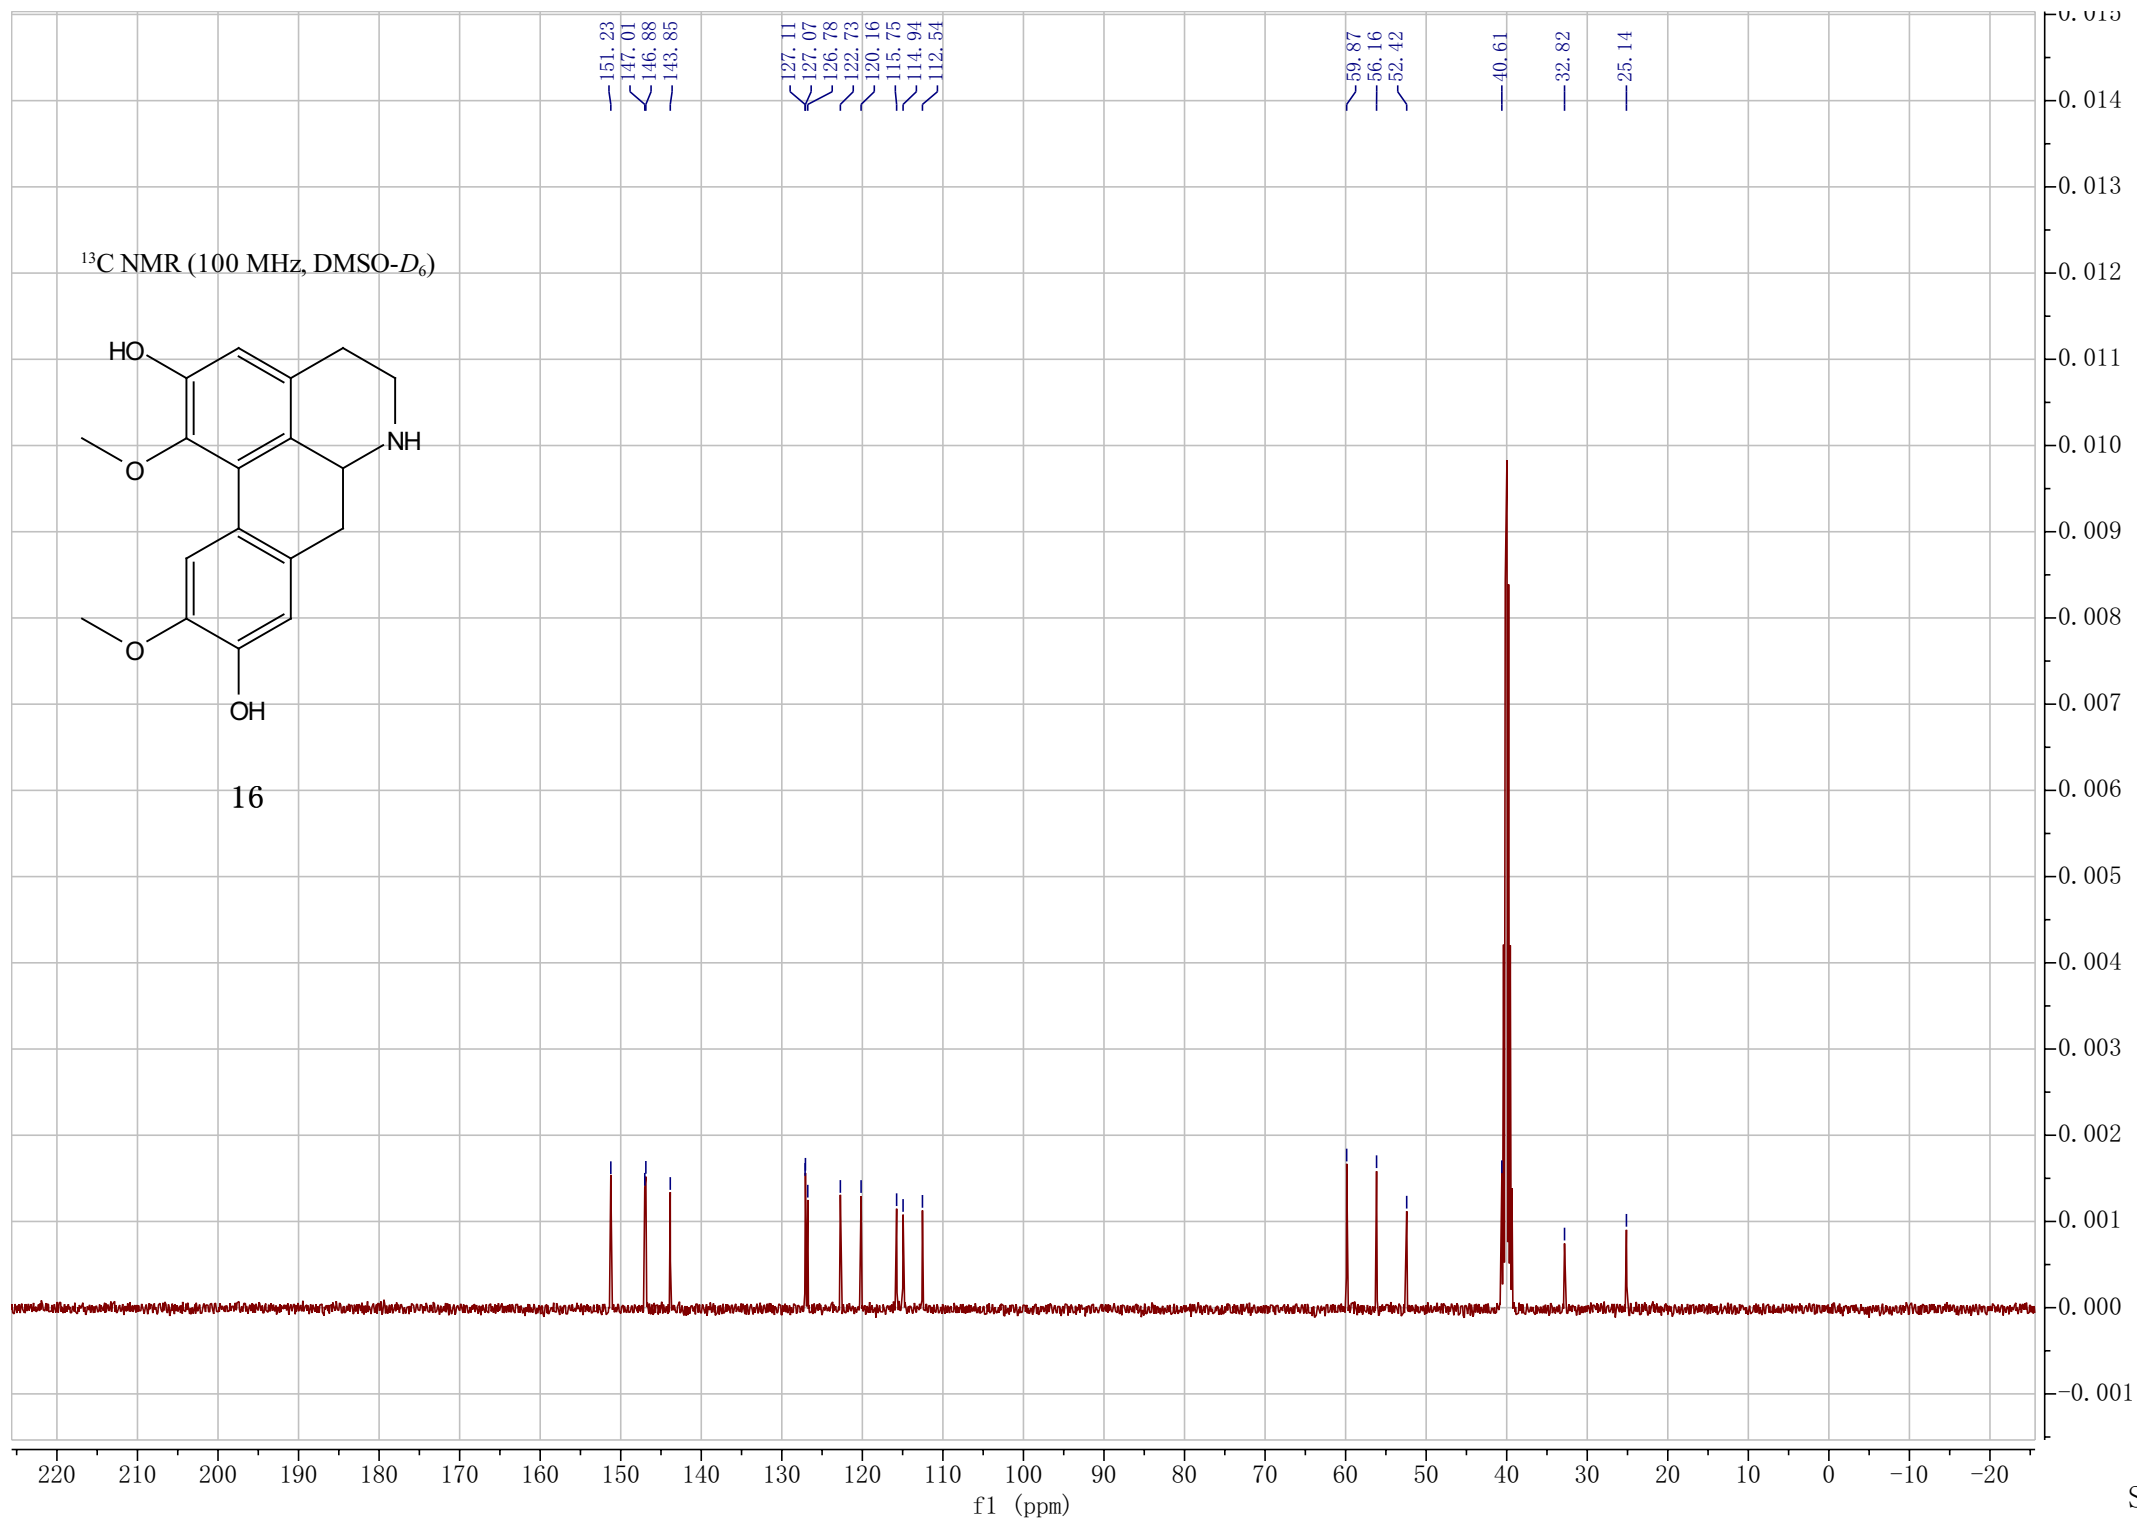

Supplement: s1 [file s1]
